# 1 Identification of a stereotypic molecular arrangement of glycine 2 receptors at native spinal cord synapses

3  
4  
5 **Stephanie A Maynard<sup>1</sup>, Philippe Rostaing<sup>1</sup>, Olivier Gemin<sup>1</sup>, Adrien Candat<sup>1</sup>, Andréa  
6 Dumoulin<sup>1</sup>, Natascha Schaefer<sup>2</sup>, Carmen Villmann<sup>2</sup>, Antoine Triller<sup>1\*</sup>, Christian G  
7 Specht<sup>1,3\*</sup>**  
8

9 <sup>1</sup> Institut de Biologie de l'ENS (IBENS), Ecole Normale Supérieure, CNRS, Inserm,  
10 Université PSL, Paris, France

11 <sup>2</sup> Institute for Clinical Neurobiology, University Hospital, Julius-Maximilians-University,  
12 Würzburg, Germany

13 <sup>3</sup> Diseases and Hormones of the Nervous System (DHNS), Inserm, Université Paris-Saclay,  
14 Le Kremlin-Bicêtre, Paris, France

15 \* correspondence: [triller@biologie.ens.fr](mailto:triller@biologie.ens.fr), [christian.specht@inserm.fr](mailto:christian.specht@inserm.fr)  
16

## 17 **ORCID numbers:**

18 Stephanie A Maynard 0000-0002-7838-3676

19 Olivier Gemin 0000-0003-3210-7876

20 Andréa Dumoulin 0000-0003-1309-3448

21 Natascha Schaefer 0000-0001-9743-1963

22 Carmen Villmann 0000-0003-1498-6950

23 Antoine Triller 0000-0002-7530-1233

24 Christian G Specht 0000-0001-6038-7735  
25

## 26 **Short title:**

27 Quantitative SR-CLEM of glycinergic synapses  
28

## 29 **Key words**

30 single molecule localization microscopy (SMLM); glycine receptor (GlyR); gephyrin;  
31 photoactivated localization microscopy (PALM); correlative light and electron microscopy  
32 (CLEM); super-resolution CLEM (SR-CLEM); super-resolution radial fluctuation (SRRF)  
33 analysis; spinal cord; synapse; hyperekplexia; oscillator mouse model; hypomorph

34

35 **Abstract**

36 Precise quantitative information about the molecular architecture of synapses is essential to  
37 understanding the functional specificity and downstream signaling processes at specific  
38 populations of synapses. Glycine receptors (GlyRs) are the primary fast inhibitory  
39 neurotransmitter receptors in the spinal cord and brain stem. These inhibitory glycinergic  
40 networks crucially regulate motor and sensory processes. Thus far the nanoscale organization  
41 of GlyRs underlying the different network specificities has not been defined. Here, we have  
42 quantitatively characterized the molecular arrangement and ultra-structure of glycinergic  
43 synapses in native spinal cord tissue using quantitative super-resolution correlative light and  
44 electron microscopy (SR-CLEM). We show that GlyRs exhibit equal receptor-scaffold  
45 occupancy and constant absolute packing densities of about 2000 GlyRs  $\mu\text{m}^{-2}$  at synapses  
46 across the spinal cord and throughout adulthood, even though ventral horn synapses have  
47 twice the total copy numbers, larger postsynaptic domains and more convoluted morphologies  
48 than dorsal horn synapses. We demonstrate that this stereotypic molecular arrangement is  
49 maintained at glycinergic synapses in the *oscillator* mouse model of the neuromotor disease  
50 hyperekplexia despite a decrease in synapse size, indicating that the molecular organization of  
51 GlyRs is preserved in this hypomorph. We thus conclude that the morphology and size of  
52 inhibitory PSDs rather than differences in GlyR packing determine the postsynaptic strength  
53 of glycinergic neurotransmission in motor and sensory spinal cord networks.

54

55 **Introduction**

56 Synaptic transmission relies on the integration of neurotransmitter-induced signals by  
57 membrane receptors in the postsynaptic density (PSD). The molecular arrangement of  
58 postsynaptic receptors and scaffold proteins is therefore key to the synaptic function, however  
59 the heterogeneity and complexity of the PSD has made it difficult to resolve its internal  
60 organization, to ascertain whether distinct compositional states exist, and to determine how  
61 the organization is affected in disease.

62

63 Glycine receptors (GlyRs) are the main inhibitory neurotransmitter receptors in the adult  
64 spinal cord and brainstem. Glycinergic neurons arise from different embryonic origins, with  
65 specific types of neurons residing in characteristic layers of the spinal cord (Lu et al., 2015).  
66 Depending on their location, glycinergic neurons mediate sensory and motor information in  
67 the dorsal and ventral spinal cord, respectively, which requires high reliability and fidelity of

68 transmission (Alvarez, 2017). Consequently, deficits in glycinergic transmission are involved  
69 in pain mechanisms (Harvey et al., 2004) and motor-related neurological diseases (Schaefer et  
70 al., 2018). The electrophysiological properties of glycinergic currents indicate that only a  
71 limited number of receptors are activated by the release of a single synaptic vesicle  
72 (Oleskevich et al., 1999; Singer and Berger, 1999), suggesting that the nanoscale organization  
73 of the receptors determines signal amplitude.

74  
75 It has been shown that neurotransmitter receptors at excitatory and inhibitory GABAergic  
76 synapses are organized within sub-synaptic domains (SSDs) that are aligned with presynaptic  
77 elements of the active zone (AZ) (Crosby et al., 2019; MacGillavry et al., 2013; Pennacchietti  
78 et al., 2017; Tang et al., 2016). These so-called trans-synaptic nanocolumns are thought to  
79 increase the efficacy of synaptic transmission (Haas et al., 2018). At mixed inhibitory  
80 synapses, both glycine and GABA<sub>A</sub> receptors are immobilized opposite to presynaptic release  
81 sites through direct interactions with their common scaffold protein gephyrin (Maric et al.,  
82 2011; Specht et al., 2013). However, absolute quantification of receptor numbers and their  
83 precise arrangement within the native PSD is lacking. Further, the question is raised as to  
84 whether the structure of glycinergic synapses varies in functionally diverse circuits of the  
85 dorsal and ventral spinal cord, if it changes over time such as aging, and if it is disturbed in  
86 GlyR pathologies such as the neuromotor disease hyperekplexia in humans. In these patients,  
87 mutations within the receptor subunit genes *GLRA1* and *GLRB* lead to decreased receptor  
88 availability and disturbances in glycinergic transmission, causing exaggerated startle reflexes,  
89 muscle hypertonia and stiffness in infancy (Chung et al., 2013; Chung et al., 2010; Schaefer et  
90 al., 2013).

91  
92 To investigate whether the molecular arrangement of GlyRs may account for differences in  
93 the functional specificity of sensory and motor circuits we have quantitatively analyzed the  
94 ultra-structural organization of inhibitory synapses in native tissue. We have combined  
95 molecule counting of endogenous GlyRs using single molecule localization microscopy  
96 (SMLM) with correlative light and electron microscopic analysis (CLEM) to obtain absolute  
97 receptor numbers as well as detailed spatial information of the synapse at the nanometer scale.  
98 We have further examined to what extent the molecular organization is maintained throughout  
99 adult development and during GlyR $\alpha$ 1-deficiency. We show that GlyRs are packed at a  
100 constant density of about 2000 receptor complexes per  $\mu\text{m}^2$  at mature synapses, suggesting  
101 that they are assembled in a stereotypic fashion. This GlyR molecular organization is

102 maintained in the hyperekplexia model *oscillator* despite a decrease in ventral synapse size,  
103 indicating that GlyR $\alpha$ 1-deficiency does not affect the integrity of the synaptic arrangement as  
104 such. Collectively, these results provide the structural basis for understanding the mechanisms  
105 underlying receptor availability and integration of neurotransmitter-induced signals.

106

## 107 **Results**

### 108 **Generation of a KI model expressing endogenous levels of mEos4b-GlyR $\beta$**

109 In order to quantify GlyR numbers and their precise distribution at native synapses we  
110 generated a knock-in (KI) mouse model expressing endogenous mEos4b-tagged GlyR $\beta$   
111 subunits (Fig. S1). The  $\beta$ -subunit drives the synaptic localization of the receptor through  
112 direct interactions with the synaptic scaffold protein gephyrin at inhibitory synapses (Kim et  
113 al., 2006; Meyer et al., 1995). To date, labeling the  $\beta$ -subunit has proven difficult and has thus  
114 limited the study of the receptor. The coding sequence of mEos4b was inserted in exon 2 of  
115 the *Glr*b gene by homologous recombination supported by a guide RNA (CRISPR-Cas9) to  
116 increase recombination efficiency (ICS, Illkirch, France). The correct insertion was confirmed  
117 by amplification and sequencing of genomic DNA. Semi-quantitative RT-PCR revealed that  
118 equal concentrations of *Glr*b<sup>Eos</sup> and the wild-type transcript (*Glr*b<sup>WT</sup>) are expressed in  
119 heterozygous animals. When bred to homozygosity, KI animals reach adulthood and display  
120 no overt phenotype, suggesting that the presence of the N-terminal fluorophore does not affect  
121 receptor expression and function.

122

### 123 **Quantitative confocal imaging of endogenous mEos4b-GlyR $\beta$ and mRFP-gephyrin at** 124 **native spinal cord synapses**

125 To verify the expression and synaptic targeting of the mEos4b-GlyR $\beta$  protein we carried out  
126 quantitative confocal imaging in 40  $\mu$ m vibratome tissue sections. *Glr*b<sup>Eos</sup> animals were  
127 crossed with a KI mouse line expressing mRFP-tagged gephyrin to visualize inhibitory  
128 postsynaptic densities (PSDs) (Specht et al., 2013). Since the synaptic localization of the  
129 GlyR is strictly dependent on its interaction with gephyrin (Patrizio et al., 2017), we expected  
130 a high degree of co-localization of the two proteins in the brainstem and spinal cord  
131 (Zeilhofer et al., 2005). Indeed, mEos4b-GlyR $\beta$  was widely expressed at inhibitory synapses  
132 in the thalamus, midbrain, pons and medulla (Fig. S1). Very little fluorescence was detected  
133 in the forebrain, despite the high reported expression of the *Glr*b transcript (Fujita et al., 1991;  
134 Malosio et al., 1991; Weltzien et al., 2012).

135

136 In the spinal cord, we observed bright punctate mEos4b-GlyR $\beta$  signals throughout the gray  
137 matter, with the exception of the superficial laminae of the dorsal horn, where the intensity of  
138 the green fluorescence was markedly lower (Fig. 1A). The expression of mEos4b-GlyR $\beta$  and  
139 mRFP-gephyrin in homozygous and heterozygous animals was quantified in confocal images  
140 of thoracic and lumbar spinal cord slices at 2 months (Fig. 1B) and 10 months of age (Fig. S2).  
141 The integrated mEos4b intensity at gephyrin-positive ventral horn synapses was exactly two  
142 times higher in *Glrb*<sup>Eos/Eos</sup> mice than in *Glrb*<sup>Eos/WT</sup>, demonstrating that both alleles are  
143 expressed with the same efficiency, and that the mEos4b fluorophore does not affect the  
144 synaptic localization of the receptor complexes. To confirm that the confocal image  
145 acquisition was in the linear dynamic range we bleached the mEos4b fluorophores by  
146 repeatedly scanning the same tissue area at constant laser power (Fig. 1A, white square),  
147 which resulted in a linear decay of pixel intensities over a range of more than 20 fold (Fig.  
148 1C).

149

150 Across the spinal cord slices, the intensity of synaptic mEos4b-GlyR $\beta$  puncta increased from  
151 dorsal to ventral both in homozygous (Fig. 1D-E) and in heterozygous animals (Fig. S2).  
152 Similarly, mRFP-gephyrin fluorescence was higher and more variable in the ventral horn,  
153 suggesting that synapses were on average about twice as big as those in the dorsal horn,  
154 despite being fewer in number (Fig. 1F, S2). The mEos4/mRFP ratio was relatively equal  
155 across the spinal cord with the exception of the superficial layers of the dorsal horn, where  
156 gephyrin levels largely exceeded the GlyRs (Fig. 1A and D). The lower GlyR-scaffold  
157 occupancy of synapses in laminae I-III can be explained by the predominant expression of  
158 GABA<sub>A</sub>Rs that compete for receptor binding sites at these mixed inhibitory synapses  
159 (Alvarez et al., 1996; Lorenzo et al., 2014; Todd et al., 1996).

160

### 161 **Dual-color super-resolution imaging of glycinergic spinal cord synapses**

162 To quantify the observed structural differences at super-resolution, we combined radial  
163 fluctuation (SRRF) analysis of mRFP-gephyrin and photo-activated localization microscopy  
164 (PALM, a form of SMLM) of mEos4b-GlyR $\beta$  in spinal cord tissue from double KI animals.  
165 Sucrose impregnated cryosections of 2  $\mu$ m thickness were prepared from dorsal and ventral  
166 tissue and placed on gridded coverslips (Fig. 2A). SRRF and PALM images were acquired  
167 sequentially. First, mRFP signals were recorded with high intensity 561 nm laser illumination

168 until all mRFP fluorophores were bleached (10,000 frames). mEos4b was then  
169 photoconverted with increasing 405 nm laser intensity and imaged at 561 nm for 25,000  
170 frames until all available fluorophores were exhausted. By acquiring both fluorophores in the  
171 same emission band (607/36 nm), any chromatic misalignment between the two super-  
172 resolved images was eliminated. SRRF reconstruction was carried out on the raw mRFP  
173 image sequence and PALM images were generated from individual mEos4b detections using  
174 Gaussian peak fitting (Fig. 2B).

175

176 The majority of synaptic clusters were small and spherical or elongated. Larger clusters  
177 displaying a variety of morphologies including elongated shapes seen in side-view (Fig. 2B)  
178 as well as convoluted structures which were more frequently seen in the ventral horn (Fig. S3).  
179 As expected of two directly interacting synaptic components the degree of co-localization of  
180 mEos4b-GlyR $\beta$  and mRFP-gephyrin was very high, with mean intensity correlation quotients  
181 (ICQ) around 0.3 (Fig. 2C and S3). Minor mismatches between the super-resolution images  
182 are explained by the fact that the majority of synapses are seen in cross-section and that the  
183 two fluorophores are located on opposite sides of the postsynaptic membrane (~30 nm  
184 distance, (Specht et al., 2013)). There were no obvious differences between the ICQ values of  
185 dorsal versus ventral synapses (0.28-0.3), indicating equivalent GlyR $\beta$ -gephyrin binding in  
186 the two regions. It should be noted that the ICQ reflects relative fluctuations between images  
187 and is not sensitive to absolute differences in signal intensities, resulting in similar ICQ values  
188 in animals that are heterozygous or homozygous for mRFP-gephyrin (Fig. 2C). Quantitative  
189 comparison of mEos4b-GlyR $\beta$  and mRFP-gephyrin intensities confirmed that the amounts of  
190 receptor and scaffold proteins are closely correlated, and that the occupancy of receptor  
191 binding sites is the same in the dorsal and ventral horn, independent of synapse size (Fig. 2D  
192 and S3). To estimate the sizes of the synapses we applied a density threshold to the PALM  
193 pointillist images and calculated the areas of the mEos4b-GlyR $\beta$  clusters (Fig. 2E). The mean  
194 synapse area in the ventral horn was larger and more variable than in the dorsal region, both  
195 in animals of 2 and 10 months of age (Fig. 2F). We also remarked that the overall number of  
196 synapses in ventral horn tissue was lower compared to the dorsal horn, significantly so by 10  
197 months (Fig. 2G, see also Fig. 1F and S2). The inverse relationship between synapse number  
198 and size is likely due to the presence of different cell types in the two regions, specifically  
199 Renshaw cells and large motor neurons in the ventral horn that require strong inhibitory  
200 control (e.g. (Bhumbra et al., 2014)).

201

202 **Absolute quantification of GlyR numbers and densities at native spinal cord synapses**

203 Given that mEos4b-GlyR $\beta$  subunits are expressed at endogenous levels in *Glr $\beta$ <sup>Eos/Eos</sup>* animals  
204 and that all the fluorophores were exhausted during the PALM recordings, we were able to  
205 count the absolute number of GlyR complexes at native spinal cord synapses. The total  
206 number of mEos4b-GlyR $\beta$  detections at synapses (Fig. S4) was converted into molecule  
207 numbers, taking into account the blinking properties of the fluorophore and the  $\alpha_3:\beta_2$   
208 stoichiometry of the pentameric GlyR complex (Durisic et al., 2014; Patrizio et al., 2017). To  
209 this aim, the average number of detections per fluorophore (detections/burst) and the fraction  
210 of functional fluorophores (probability of detection,  $P_{\text{det}}$ ; Fig. S5) were determined in each set  
211 of experiments using extrasynaptic receptor complexes (Fig. 2E, red arrowheads). We  
212 calculated a median copy number of 114 pentameric GlyR complexes at dorsal horn synapses  
213 and twice that number at ventral horn synapses in 2 month old animals (Fig. 2H). Copy  
214 numbers were almost identical at 10 months (Fig. S6), indicating that the glycinergic network  
215 was mature at both time points. These numbers exceed estimates derived from  
216 electrophysiological recordings in new-born, juvenile and adult rat spinal cord neurons that  
217 suggest an activation ranging from 7 up to about 110 GlyRs during an average miniature  
218 inhibitory postsynaptic current (mIPSC) (Chery and de Koninck, 1999; Oleskevich et al.,  
219 1999; Singer and Berger, 1999; Takahashi, 1992). The high absolute numbers of GlyRs  
220 measured by fluorophore counting therefore imply that the available receptors are not  
221 saturated by quantal release, which is likely to increase the dynamic range of postsynaptic  
222 inhibition (Alvarez, 2017).

223

224 Our quantitative PALM data further demonstrate that differences in receptor numbers result  
225 from differences in synapse size (Fig. 2F). By combining the two parameters, we derived  
226 mean GlyR densities of  $\sim 2000 \mu\text{m}^{-2}$  (Fig. 2I, S6). Similar receptor densities of  $1250 \mu\text{m}^{-2}$  and  
227  $\sim 2000 \mu\text{m}^{-2}$  have been measured at GABAergic synapses in cerebellar stellate cells and in  
228 cultured hippocampal neurons, respectively (Liu et al., 2020; Nusser et al., 1997). We saw no  
229 differences in the GlyR packing density at dorsal and ventral horn synapses, nor did we find a  
230 clear size dependence, as determined by linear regression of all synapses (Fig. 2I) and the  
231 evolution of the coefficient of variation of GlyR density with respect to synapse area (Fig. S6).  
232 These findings are significant because they indicate that GlyR density is constant and largely  
233 independent of neuron type, embryonic origin or physiological function. Assuming that

234 gephyrin molecules are clustered at densities of up to  $9000 \mu\text{m}^{-2}$  (Specht et al., 2013), our data  
235 also suggest that close to 50% of the receptor binding sites are occupied by GlyRs at native  
236 spinal cord synapses, in line with earlier observations of GlyR subunits that were  
237 overexpressed in cultured neurons (Patrizio et al., 2017).

238

### 239 **Quantitative SR-CLEM of GlyR $\beta$ molecular organization**

240 To integrate the results of molecule counting with three-dimensional ultra-structural  
241 information and the exact synapse size, we further analyzed dorsal and ventral horn synapses  
242 by SR-CLEM. Previously imaged cryosections of *Glr $\beta$ <sup>Eos/Eos</sup>* tissue from 10 month old  
243 animals were embedded in epoxy resin, and ultra-thin (70 nm) serial sections were collected  
244 on EM slot grids with an ultramicrotome (Fig. 3A). After osmium tetroxide enhancement,  
245 electron micrographs of identified synapses were acquired in all serial sections and registered  
246 manually, using the coverslip grids and cellular structures as reference (Fig. 3B-C). All of the  
247 synapses that were both, imaged by PALM and reconstructed with EM were functionally  
248 mature, as judged by the apposition of a single presynaptic terminal containing synaptic  
249 vesicles. In line with our PALM data we found that glycinergic synapses in the ventral horn  
250 were substantially larger and more variable in size than those in the dorsal horn (Fig. 3C-D).  
251 There was good correspondence between the calculated synapse areas in the EM and PALM  
252 image reconstructions, even though PALM underestimated the sizes of some large ventral  
253 horn synapses (Fig. S7). This is probably due to the fact that a majority of synapses are tilted,  
254 and that the axial component of the area is not captured in the SMLM projections. Whereas  
255 most synapses in the dorsal horn were macular, ventral synapses were frequently composed of  
256 sub-domains (Fig. 3E-G). In agreement with earlier studies (Alvarez et al., 1997; Lushnikova  
257 et al., 2011; Santuy et al., 2018), the degree of complexity scales with the size of the PSD  
258 (Fig. 3F), and was taken into account for the calculation of the combined area in the EM serial  
259 sections.

260

261 The ratio of GlyR copy numbers and the area of the inhibitory PSDs obtained by EM resulted  
262 in average receptors densities of approximately  $2000 \mu\text{m}^{-2}$  (Fig. 3H). Consistent with our  
263 PALM estimates we did not observe significant differences between synapses in the dorsal  
264 and the ventral horn (Fig. 2I, S6). Furthermore, the GlyR packing density was not dependent  
265 on synapse size (Fig. 3I), supporting an earlier proposal (Lim et al., 1999). This suggests that  
266 GlyRs are assembled in a systematic manner, where receptor numbers increase linearly with  
267 synapse size. Since the morphological complexity of synapses increases with size, it can also



268 be concluded that GlyR occupancy at individual sub-domains of the PSD is uniform. GlyR  
269 densities were indeed not significantly different within sub-clusters of reconstructed synapses  
270 (Fig. 3G and I, black data points). Together, these findings point to a tight regulation of the  
271 architecture of glycinergic synapses across different molecular length scales, where GlyRs are  
272 arranged in sub-synaptic signaling units.

273

### 274 **Integrity of GlyR molecular arrangement is unaltered in the hyperekplexia mouse** 275 **model *oscillator***

276 Having identified that GlyRs have a stereotypic molecular organization that is maintained  
277 throughout adulthood and across synapses in different neuronal circuits, we questioned  
278 whether this arrangement is altered in a mouse model of hyperekplexia, a motor-related  
279 neurological disease that significantly impacts motor processing in the ventral horn of the  
280 spinal cord. The mouse mutation *oscillator* (*Glr1*<sup>spd-ot/spd-ot</sup>) is recessively inherited and  
281 causes a microdeletion and frameshift in the TM3-4 intracellular loop of the GlyR $\alpha$ 1 subunit  
282 leading to subunit truncation and subsequent loss of functional GlyRs at synapses (Kling et  
283 al., 1997). Homozygous *oscillator* mice do not live past 3 weeks of age (Buckwalter et al.,  
284 1994). In contrast, heterozygous animals have a normal lifespan and exhibit a more subtle  
285 phenotype. *Glr1*<sup>spd-ot/WT</sup> mice display an increased startle reflex and lower GlyR $\alpha$ 1 levels  
286 (Kling et al., 1997), making them a suitable model for human hyperekplexia. We generated  
287 mutant mice that were homozygous for mEos4b-GlyR $\beta$  (as described above) and  
288 heterozygous for *oscillator* (*Glr1*<sup>Eos/Eos</sup> / *Glr1*<sup>spd-ot/WT</sup>) as well as wild-type littermates  
289 (*Glr1*<sup>Eos/Eos</sup> / *Glr1*<sup>WT/WT</sup>). In these experiments, inhibitory synapses were detected by  
290 immunolabeling of endogenous gephyrin using mAb7a antibody.

291

292 Quantitative confocal imaging in 40  $\mu$ m vibratome tissue sections showed bright punctate  
293 mEos4b-GlyR $\beta$  signals localized to synapses (Fig.4A). Across the spinal cord slices, the  
294 intensity of synaptic mEos4b-GlyR $\beta$  puncta increased from dorsal to ventral in homozygous  
295 WT animals (Fig. 4B), replicating the intensity profile observed previously (Fig. 1D). The  
296 intensity of synaptic mEos4b-GlyR $\beta$  puncta in *oscillator* animals were substantially lower  
297 than those of WT littermates, which explains the reductions in membrane levels of GlyR and  
298 gephyrin previously observed by Western blotting (Kling et al., 1997). The mEos4/gephyrin-  
299 7a ratio was relatively equal across the spinal cord with greater variation seen in *oscillator*.  
300 No ectopic GlyR $\beta$  clusters were detected, meaning that GlyRs and gephyrin always

301 colocalized (Fig. S8). The number of gephyrin-positive synapses across the spinal cord  
302 remained unchanged between WT and *oscillator*.

303

304 Using our quantitative PALM approach, we determined the number and size of glycinergic  
305 synapses in tissue slices of dorsal and ventral spinal cord, as well as the mEos4b detection  
306 density, in order to understand the alterations in glycinergic synapse architecture in this  
307 mutant mouse model. In WT animals we observed small and spherical dorsal synapses and  
308 larger, elongated ventral synapses, while *oscillator* synapses appeared small in both dorsal  
309 and ventral tissue. (Fig. 5A). This was confirmed by quantitative analysis. The mean synapse  
310 area in the ventral horn was significantly larger than in the dorsal region in WT animals (Fig.  
311 5B), in agreement with our earlier data (Fig. 2F). However, this difference was lost in  
312 *Gral*<sup>spd-ot/WT</sup> littermates. The overall number of synapses was lower in ventral horn tissue  
313 compared to the dorsal horn in both WT and *oscillator* animals (Fig. 5C). These data suggest  
314 that the decrease in functional receptors in heterozygous *oscillator* mice manifests itself as a  
315 reduction in the size of ventral synapses.

316

317 We further quantified the total number of mEos4b-GlyR $\beta$  detections at synapses (Fig.5D) and  
318 found that the number and distribution of WT mice detections matched that of 2 and 10 month  
319 old WT animals analyzed previously (Fig. S4). We found similar numbers of detections in  
320 *oscillator* dorsal synapses compared to WT littermates, however in ventral tissue we found a  
321 shift towards lower detection numbers per synapse, indicative of smaller synapses. By  
322 combining the measurements of synapse area with the number of detections per synapse we  
323 could derive the receptor density. Consistent with our previous PALM data, we found a  
324 constant density independent of synapse size in WT mice, as determined by the shallow slope  
325 of the linear regression (Fig.5E). We found a similar and constant GlyR packing density in  
326 synapses of *oscillator* mice. This suggests that despite a decrease in the total numbers of  
327 functional GlyRs in the heterozygous *oscillator* mouse model the molecular organization  
328 underlying receptor clustering within the synapse is maintained, in line with the lack of an  
329 overt neuromotor phenotype in these animals. In other words, the receptors are assembled  
330 stereotypically in the disease model, as in WT, with synapse size consistently scaling with  
331 receptor number. Together, our findings describe a highly regulated architecture of  
332 glycinergic synapses in both WT animals as well as in a model of synaptic pathology,  
333 providing a structural basis of glycinergic signaling.

334

## 335 **Discussion**

336 Combining single molecule PALM imaging, molecular counting and 3D electron microscopy  
337 we have shown that glycinergic synapses in different regions of the spinal cord follow the  
338 same structural principle, insofar as their receptor-scaffold occupancy and packing densities  
339 are the same. This uniformity extends to the sub-synaptic level. The presence of so-called  
340 sub-synaptic domains (SSDs) at inhibitory synapses has been shown by super-resolution  
341 microscopy (Crosby et al., 2019; Dzyubenko et al., 2016; Pennacchietti et al., 2017; Specht et  
342 al., 2013). However, it remains controversial whether the identified patterns represent the  
343 overall structure of the PSD itself or whether they reflect intra-synaptic variations in molecule  
344 clustering. Our quantitative SR-CLEM data lend support to the first model, whereby  
345 inhibitory PSDs in the spinal cord are composed of sub-domains that shape the distribution of  
346 the GlyRs. This organization is achieved through direct interactions between GlyRs and  
347 gephyrin, as shown by the close correspondence between the receptors and scaffold proteins.  
348 As such, the GlyR sub-clusters at spinal cord synapses do not constitute SSDs within the PSD  
349 in the strict sense, since they exhibit uniform binding to the synaptic scaffold (discussed in  
350 (Yang and Specht, 2019)). The stereotypic GlyR density within SSDs observed in our study  
351 supports the idea that these structures can instead be equated with the convolutions of the  
352 synaptic junction observed by EM (Alvarez et al., 1997; Lushnikova et al., 2011; Peters and  
353 Palay, 1996; Santuy et al., 2018). The formation of these convolutions is probably a  
354 consequence of gephyrin oligomerization that appears to introduce an asymmetry in the  
355 synaptic scaffold. The situation may be different at GABAergic synapses, where the co-  
356 existence of gephyrin-dependent and gephyrin-independent clustering mechanisms could lead  
357 to the formation of spatially more restricted SSDs containing different GABA<sub>A</sub>R subtypes  
358 (Pennacchietti et al., 2017; Specht, 2020).

359  
360 The nanoscale organization of inhibitory PSDs is the same in glycinergic neurons in the  
361 dorsal and the ventral spinal cord, despite their different embryonic origins. Ventral horn  
362 synapses are generally larger, more complex and contain more GlyRs, suggesting that the size  
363 of the synapse is differentially regulated in a regional and cell type specific manner to adjust  
364 the level of glycinergic inhibition. As such, these synapses may be particularly well adapted  
365 to motor circuits, assuring strong and reliable inhibition of the postsynaptic neuron (Alvarez,  
366 2017). At the same time, the long and tortuous perimeter of the PSD is likely to accelerate the  
367 dynamic exchange of GlyRs and other synaptic components (Chow et al., 2017; Santuy et al.,  
368 2018), thereby promoting the molecular plasticity at complex inhibitory synapses (Specht,

369 2020). It can further be argued that large and morphologically complex synapses may be  
370 particularly well adapted to integrate fast temporal, or indeed multi-vesicular release arising  
371 from one or more presynaptic sites, thus providing a strong and reliable inhibition of the  
372 postsynaptic neuron while maintaining fast neurotransmitter clearance (discussed in (Alvarez,  
373 2017; Rudolph et al., 2015)).

374

375 In addition, our data show that GlyR density and occupancy do not change between 2 and 10  
376 months of age, indicating that receptor clustering is fully mature by the earlier time point.  
377 Studies of normal aging of spinal cord synapses are scarce, and its effect on receptor  
378 organization has not been studied. Broadhead and colleagues (Broadhead et al., 2020) report  
379 no difference between the number of excitatory synapses in the ventral horn and only a slight  
380 increase in dorsal synapses between 2 to 9 month old mice. Broadly in line with these  
381 findings, we found no difference in the number of synapses, synapse area, and GlyR packing  
382 density in dorsal and ventral tissue between 2 and 10 months. Thus, glycinergic PSDs show  
383 considerable control over their molecular composition throughout adulthood, further  
384 emphasizing the functional significance of their synaptic architecture in both sensory and  
385 motor signaling. Our data therefore suggest that a constant GlyR density potentially provides  
386 the most efficient organization of the glycinergic PSD, while enabling the refinement of the  
387 size and complexity of the synapse due to ongoing neural activity.

388

389 The neuromotor disease hyperekplexia results from defects in glycinergic inhibition in  
390 humans. Several mouse models with analogous mutations in the *Glr1* gene recapitulate the  
391 phenotype of exaggerated startle reflexes and muscle stiffness (Schaefer et al., 2018). In  
392 general, the mutations in the various mouse models are less well tolerated than in humans,  
393 often with lethal phenotypes in homozygotes. Hyperekplexia can be recessively or dominantly  
394 inherited in humans, but neither has been shown to cause lethality. The *oscillator* model,  
395 whilst lethal as a homozygous, displays a relatively mild phenotype in heterozygous animals,  
396 with a measurable startle reflex and normal lifespan (Kling et al., 1997). Heterozygous  
397 *oscillator* therefore represents a relevant model for the subtler phenotype in humans and the  
398 long-term stability of glycinergic synapses beyond the developmental stage at which lethality  
399 occurs in homozygous animals. However, it is not known how the reduced GlyR levels in the  
400 *Glr1*<sup>spd-ot/WT</sup> hypomorph can affect (and sustain) functional motor networks. We  
401 characterized the molecular organization of heterozygous *oscillator* synapses and show that  
402 GlyR packing follows the same principle as in WT synapses, even though the total number of

403 available functional receptors is reduced, resulting in smaller synapses in the ventral spinal  
404 cord. This further emphasizes that the stereotypic arrangement of GlyRs dictates the size of  
405 the PSD. Most of the synapses that are formed in heterozygous *oscillator* likely achieve a size  
406 threshold capable of sustaining glycinergic signaling without serious motor defects. The lack  
407 of fundamental structural changes at glycinergic synapses further suggests that no or only  
408 limited compensatory effects take place in *oscillator*, in agreement with earlier findings that  
409  $\alpha 1\beta$  GlyR complexes cannot be compensated for by other subunit configurations,  $\alpha 1$ -  
410 homopentamers or GABA<sub>A</sub>Rs (Schaefer et al., 2012). Our findings thus provide a new  
411 perspective into the molecular basis of GlyR $\alpha 1$ -deficiency in an animal model of human  
412 hyperekplexia.

413  
414 Taken together, our data show that dorsal and ventral synapses are distinct populations.  
415 Ventral horn synapses have much higher GlyR copy numbers, even though receptor density is  
416 not different. In contrast to the relatively compact, macular synapses in the dorsal horn,  
417 ventral horn synapses achieve a greater receptor number by enlarging the synaptic surface,  
418 thus multiplying the sites of signal transmission. These region-specific glycinergic synapse  
419 morphologies are likely to underlie functional differences at sensory (dorsal) versus motor  
420 (ventral) circuits.

## 421 422 **Acknowledgements**

423 SAM is supported by a Fondation pour la Recherche Médicale (FRM) postdoctoral fellowship  
424 (SPF201809007132). NS was supported by funds of the Bavarian State Ministry of Science  
425 and the Arts and the University of Würzburg to the Graduate School of Life Sciences (GSLs),  
426 University of Würzburg. Research in our laboratory at IBENS is funded by the European  
427 Research Council (ERC, Platinhib), Agence Nationale de la Recherche (ANR, Synaptune  
428 and Syntrack), Labex (Memolife) and France-BioImaging (FBI). CV is supported by the  
429 Deutsche Forschungsgemeinschaft (DFG, VI586). We acknowledge the use of the EM  
430 platform of IBENS. We thank Pascal Legendre (ENP, Inserm) for insightful discussions and  
431 Constant Morez and Nadine Schibille for helpful comments on the manuscript. We also thank  
432 Marie-Christine Birling and Eve Geronimus from the Institut Clinique de la Souris (ICS,  
433 Illkirch, France) for the generation of the C57BL/6N-*Glr $\beta$* <sup>tm11cs</sup> mouse line.

434  
435  
436

437 **Author contributions**

438 SAM and CGS planned the experiments; SAM, PR, OG, AC, AD, NS and CGS performed  
439 the experiments; SAM, PR and CGS analyzed the data; CV generated the oscillator strain; AT  
440 secured funding; SAM and CGS wrote the manuscript; all authors read and approved the  
441 manuscript.

442

443 **Declaration of interests**

444 The authors declare no competing interests.

445

446 **Data and materials availability**

447 All data are available upon request.

448

449 **Materials and Methods**

450 **KI mouse model generation**

451 The knock-in (KI) mouse line C57BL/6N-*Glr*b<sup>tm1Ics</sup> (MGI:6331106) carrying the mutant allele  
452 *Glr*b<sup>tm1(Eos4)Ics</sup> (MGI:6331065) was created by homologous recombination at the Institut  
453 Clinique de la Souris (ICS, Illkirch, France). Flanked by 5' and 3' homology arms of 1.23 kb  
454 and 3.49 kb, respectively, the targeting vector encompassed exon 2 of the *Glr*b gene with an  
455 insertion of the coding sequence of mEos4b, as well as a *floxed* neomycin selection cassette  
456 containing the Cre recombinase under control of protamine promoter in intron 2-3. The  
457 selection cassette was excised in the F1 generation by germline expression of Cre, resulting in  
458 a single *loxP* site in intron 2-3 of the *Glr*b locus (Fig. S1A). The correct insertion of the  
459 mEos4b coding sequence was confirmed by sequencing of genomic *Glr*b<sup>Eos/Eos</sup> tail DNA.  
460 Genotyping was done using three primers (primer 1: TACCTTCTTGTTTTCTCTCC; primer  
461 2: GTCTGTTTTCCCTCATAAGG; primer 3: TCGCTTTTGTAATGATATGG) for the  
462 amplification of the mutant *Glr*b<sup>Eos</sup> (243 bp product) and/or the wild-type alleles (404 bp).

463

464 Purified spinal cord mRNA of *Glr*b<sup>Eos/Eos</sup>, *Glr*b<sup>Eos/WT</sup> and *Glr*b<sup>WT/WT</sup> animals was reverse  
465 transcribed (primer 6: GGAGTCTAACAGTAATCTGG), and amplified (primer 4:  
466 AGGCGCGTCAAACCTCGG; primer 5: CCATACCAACCAATGAAAGG). The correct  
467 splicing of the mutant transcript was confirmed by sequencing of amplified cDNA. For semi-  
468 quantitative RT-PCR, the *Glr*b<sup>Eos/Eos</sup> mRNA was spiked with wild-type cDNA at a ratio of  
469 1:2, 1:1 and 2:1 and amplified (Fig. S1B).

470

471 All experiments (with the exception of the data in Fig. S1A-B, 4, 5 and S8) were carried out  
472 with F2 animals resulting from a cross between the KI line C57BL/6N-*Glr*<sup>tm1Ics</sup> (see above)  
473 and a KI mouse line expressing mRFP-tagged gephyrin (Machado et al., 2011) in the  
474 C57BL/6J strain, meaning that the mice had a mixed C57BL/6N x C57BL/6J genetic  
475 background.

476

477 Adult *Glr*<sup>sp<sup>d</sup>-ot</sup> mice (*oscillator*, JAX stock #000536) from Jackson Laboratories (Bar  
478 Harbor, ME, USA) were transferred to the animal facility of the Institute of Clinical  
479 Neurobiology (Würzburg, Germany). Genotyping was done using primer 7:  
480 GCCTCCGTGCTTTCTCCCTGC and primer 8: CCAGCCACGCCCAAAG for the  
481 amplification of the mutant *Glr*<sup>sp<sup>d</sup>-ot</sup> (187 bp product) and/or the wild-type alleles (194 bp).  
482 *Oscillator* mice were backcrossed into the C57BL/6J background for at least 15 generations.  
483 Heterozygous *Glr*<sup>Eos/WT</sup> animals were crossed with heterozygous *oscillator* mice for two  
484 generations giving rise to F2 heterozygous *oscillator* animals that are homozygous for the  
485 *Glr*<sup>tm1(Eos4)Ics</sup> allele (*Glr*<sup>+sp<sup>d</sup>-ot</sup>/*Glr*<sup>Eos/Eos</sup>). These animals had a mixed C57BL/6N x  
486 C57BL/6J genetic background and were used for the experiments shown in Fig. 4, 5 and S8.

487

488 All experiments were in accordance with European Union guidelines and approved by the  
489 local veterinary authorities. Animals at IBENS were treated in accordance with the guidelines  
490 of the French Ministry of Agriculture and Direction Départementale des Services Vétérinaires  
491 de Paris (École Normale Supérieure, Animalerie des Rongeurs, license B 75-05-20).  
492 Procedures carried out at the Institute for Clinical Neurobiology were approved by the  
493 Veterinäramt der Stadt Würzburg and the Committee on the Ethics of Animal Experiments  
494 (Regierung von Unterfranken, Würzburg) and authorized under reference numbers 55.2-  
495 2531.01-09/14; 55.2.2-2532.2-949-31.

496

#### 497 **Spinal cord and brain tissue preparation and vibratome slices**

498 Mice were sacrificed at 2 and 10 months of age by perfusion with 4% w/v paraformaldehyde  
499 (PFA; Polysciences, EM grade) and 0.1% v/v glutaraldehyde (GA; Clinisciences) in  
500 phosphate buffered saline (PBS, pH 7.4). Perfused animals were kept on ice for 30 min,  
501 followed by the dissection of the brain and spinal cord in PBS. Tissue was post-fixed in 4%  
502 w/v PFA in PBS overnight at 4 °C. Brain and spinal cord tissue was rinsed in PBS, cut into  
503 smaller segments of thoracic and lumbar regions of the spinal cord and sliced on a vibratome

504 (Leica) at a thickness of 40  $\mu\text{m}$  (for confocal imaging) and 300  $\mu\text{m}$  (for Tokuyasu  
505 preparation), and stored in PBS at 4  $^{\circ}\text{C}$ .

506

### 507 **Confocal imaging and analysis**

508 In order to label the gephyrin in the oscillator and WT littermates, free-floating vibratome  
509 slices (40  $\mu\text{m}$  thickness) were blocked and permeabilized in PBS containing 0.25% Triton  
510 X100 (Sigma) and 0.1% fish gelatin (Sigma) for 1 h, and immunolabeled with a primary  
511 antibody against gephyrin (mouse, mAb7a, 1:500 dilution, Synaptic Systems, #147011) in  
512 PBS containing 0.1% Triton X100 and 0.1% fish gelatin overnight, followed by 3 hour  
513 incubation with a Cy3-conjugated secondary antibody (goat anti mouse, 1:1000, Invitrogen).

514

515 Glass slides (Vector Laboratories) were cleaned with 70% v/v ethanol (Sigma) and vibratome  
516 sections were rinsed 3 times in PBS and mounted onto the glass slides. The glass slides were  
517 then briefly rinsed in distilled water and dried. A drop of VectaShield (Vector Laboratories)  
518 was added to each spinal cord section and covered with a #1.5 glass coverslip, which was  
519 sealed with PicoDent Twinsil Speed (equal weights of catalyst and base). Slides were stored  
520 at 4  $^{\circ}\text{C}$  for confocal imaging.

521

522 Confocal imaging was carried out on a Leica SP8 TCX microscope using a Leica HC PL  
523 APO 40x/1.30 NA oil-immersion objective (Leica) and captured in 8-Bit using the Leica  
524 LAS-X software with setting HyD3. Images were captured sequentially, with laser  
525 illumination at wavelength 570 nm (mRFP, Cy3) imaged first, followed by laser illumination  
526 at 491 nm wavelength (mEos4). A cross-section from the dorsal horn to the ventral horn was  
527 imaged at a zoom of 5, speed of 25, 512 x 512 pixel (px) format. For decay analysis, 8  
528 consecutive frames were captured at a zoom of 5, speed 25, 512 x 512 px format. To tile the  
529 whole spinal cord, images were captured in at a zoom of 1, speed 100, 256 x 256 px format.

530

531 To ensure alignment of the clusters for the decay traces, images were opened in the image  
532 analysis software ICY, and the rigid registration plug-in used, taking the first frame of mRFP-  
533 gephyrin as reference. The mRFP-gephyrin/ and mEos4b-GlyR $\beta$  channels were then  
534 separated and the Spot Detector plug-in (de Chaumont et al., 2012) used to identify the  
535 clusters in each frame in the mRFP-gephyrin channel, with the identified clusters saved as a  
536 region of interest (ROI) set. Using the image analysis software FIJI, the identified mRFP-  
537 gephyrin positive cluster ROI-Set was used to identify inhibitory synapses in the first frame of



538 the mEos4b-GlyR $\beta$  channel. These inhibitory synapses were binned based on mEos4b  
539 intensity gray levels (5-12, 13-24, 25-49, 50-74, 75-99, 100-124, 125-255) in frame 1 and a  
540 new ROI-Set generated for each bin. Using the frame 1 intensity ROI-Sets, the integrated  
541 intensity of mEos4b was then measured at individual clusters across the 8 frames. This  
542 enabled decay analysis of mEos4b intensity at synapses relative to their starting intensity, see  
543 Fig. 1C.

544  
545 In order to analyze the intensity of mRFP-gephyrin and mEos4b-GlyR $\beta$  clusters within the  
546 spinal cords from mice of different genotypes, the identified mRFP-gephyrin clusters from the  
547 first frame of the decay traces (as measured by the ICY Spot Detector plug-in, see above)  
548 were used to measure the relative intensity of mRFP-gephyrin and mEos4b-GlyR $\beta$  clusters at  
549 those locations. The ROI-Set of all mRFP-gephyrin positive clusters was used in FIJI to  
550 identify inhibitory synapses, where the integrated intensity of mRFP and mEos4b was  
551 measured for each synapse (Fig. 1B).

552  
553 For the cross-sectional analysis, the mRFP-gephyrin/gephyrin-7a clusters were identified  
554 across the imaged tissue using the ICY Spot Detector plug-in, as described above, and saved  
555 as an ROI-Set. In FIJI the integrated intensity of these identified clusters was measured in the  
556 mRFP-gephyrin/gephyrin-7a channel and the mEos4b-GlyR $\beta$  channel (Fig. 1D and 1F).

557

### 558 **Cryosectioning of sucrose impregnated spinal cord tissue**

559 Sucrose impregnated cryosections were prepared using a ultracryotomy protocol adapted from  
560 (Tokuyasu, 1973). The 300  $\mu$ m spinal cord vibratome slices were transferred into a 2.3 M  
561 sucrose solution in PBS overnight at 4°C and micro-dissected to isolate gray matter of the  
562 dorsal and the ventral horn region. These fragments were placed individually on top of drops  
563 of sucrose solution on aluminium EM pins (Leica) and immediately frozen in liquid nitrogen.  
564 Sections of 2  $\mu$ m thickness were sliced on an ultramicrotome (Leica EM UC6) at -80°C and  
565 placed onto gridded coverslips (type 1.5 H, Ibidi GmbH), covered in PBS, and stored at 4°C  
566 for a maximum of 5 days before imaging.

567

### 568 **Single molecule localization microscopy (SMLM)**

569 Sucrose cryosections on gridded coverslips were rinsed once in PBS, and imaged in PBS.  
570 Dual-colour super resolution images were acquired on an inverted Nikon Eclipse Ti  
571 microscope with a 100x/1.49 NA oil-immersion objective, with an additional 1.5x lens in the

572 emission path, using an Andor iXon EMCCD camera (16-Bit, 107 nm pixel size), and NIS-  
573 Elements software (Nikon). An emission filter 607/36 was chosen for imaging both mRFP-  
574 gephyrin and mEos4b-GlyR $\beta$ . Brightfield images were taken of the whole grid square  
575 identifying tissue structures. Lamp images were taken of the unconverted mEos4b-GlyR $\beta$  and  
576 mRFP-gephyrin (10 frames of 100 ms, ND8). mRFP-gephyrin movies of 10,000 frames were  
577 recorded with HiLo 561 nm continuous laser illumination (output power 50% 400 mW, 50 ms  
578 frames). This was followed by 2 min of 100% 561 nm laser illumination to ensure all mRFP-  
579 gephyrin was bleached. Movies of 25,000 frames were recorded with photoconversion of  
580 mEos4b-GlyR $\beta$  by 0.5 ms pulsed 405 nm laser illumination (gradually increased to 100% by  
581 frame 22,000) with continuous 561 nm laser illumination (output power 50% 400 mW, 50 ms  
582 frames). The focal plane was maintained using a Nikon perfect focus system.

583

#### 584 **SMLM image analysis (SRRF and PALM)**

585 Frames 100-6000 of the mRFP-gephyrin movies were taken for analysis (to remove saturated  
586 frames at the beginning and bleached frames at the end) and were drift corrected and  
587 reconstructed using SRRF plugin for FIJI (Gustafsson et al., 2016).

588 Quantification of mEos4b-GlyR $\beta$  was carried out using a lab script for MATLAB  
589 (Mathworks). The mEos4b single fluorophores were detected by Gaussian fitting. The  
590 resulting pointillist images were drift corrected in the x/y plane using 5 dense clusters of  
591 detections over a sliding window of 2000 frames. Rendered images were produced with a  
592 pixel size of 10 nm, sigma 0.01.

593

594 The mRFP-gephyrin and mEos4b-GlyR $\beta$  rendered images were aligned by rigid registration  
595 using the FIJI plug-in TurboReg. The co-localization of mRFP-gephyrin and mEos4b-GlyR $\beta$   
596 was carried out by individually cropping each synapse as separate images. The FIJI plug-in  
597 Intensity correlation quotient (ICQ) was then applied to each synapse (Li et al., 2004). The  
598 occupancy analysis was analyzed by thresholding the synapses in the mEos4b-GlyR $\beta$  images  
599 and measuring the intensity of each synapse in both channels. To analyse the PALM mEos4b-  
600 GlyR $\beta$  clusters, a lab written script for MATLAB (CountMol; (Patrizio et al., 2017)) was used  
601 to identify synapses (minimum number of detections 250, minimum cluster size 200 nm,  
602 maximum cluster size 3000 nm) and an intensity threshold of 0.1. For molecule conversion,  
603 CountMol was used to identify extrasynaptic receptor complexes (minimum number of  
604 detections 5, minimum cluster size 10 nm, maximum cluster size 120 nm). The number of  
605 detections per burst (identified as a minimum of 2 detections, with 1 burst per 1000 frames)

606 and the probability of detection  $P_{det} = (1 - \frac{N_1/N_2}{2+N_1/N_2})$  were calculated, and used to convert  
607 the detections to mEos4b-GlyR $\beta$  molecules (Durisic et al., 2014; Patrizio et al., 2017).

608

### 609 **Electron microscopy (EM)**

610 Cryosections used for SMLM imaging on gridded coverslips were postfixed by incubation in  
611 1% osmium tetroxide for 1 h at 4 °C, dehydrated in graded ethanol concentrations, and  
612 embedded in araldite epoxy resin. Grid squares imaged in SMLM were identified using the  
613 grid pattern imprinted in the resin. Serial ultra-thin 70 nm sections of these regions were cut,  
614 transferred onto formvar-coated EM grids (0.432 mm slot grids) using a UC6 ultramicrotome  
615 (Leica). Sections were counterstained with 5% uranyl acetate in 70% methanol for 10 min,  
616 then washed in distilled water and air dried before observation on a Philips TECNAI 12  
617 microscope (Thermo Fisher Scientific).

618

619 For 3D synapse reconstruction, synapses were manually outlined in each serial section image  
620 using FIJI, followed by manual rotation and coarse alignment using the software GIMP, then  
621 fine alignment of the synaptic area with the Microscopy Image Browser (MIB) software. The  
622 aligned images were then opened in IMOD software to generate the 3D reconstruction.

623

624 The length of the PSD of identified synapses was measured in high magnification EM images  
625 with ImageJ software. The total PSD area was calculated as the cumulative length of the PSD  
626 in the entire stack of serial sections multiplied by the thickness of each section (70 nm). The  
627 segmentation index is the number of gaps in the PSD that were detected in the x/y plane of the  
628 images or along the z-axis (i.e. an interruption of the PSD in one or several continuous  
629 sections in the stack), and represents an estimate of the morphological complexity of the  
630 synapse.

631

### 632 **Graphing and statistical analysis**

633 All graphing and statistical analysis was carried out using the software GraphPad Prism v.8.  
634 Data were tested for normality of distribution using D'Agostino-Pearson and Kolmogorov-  
635 Smirnov tests. Data is represented as dot plots with median  $\pm$  interquartile range (IQR), or  
636 histograms, unless otherwise stated. \* $p < 0.05$ , \*\*  $p < 0.01$ , \*\*\*  $p < 0.001$ , ns = not  
637 significant.

638

639 **References**

- 640 Alvarez, F.J. (2017). Gephyrin and the regulation of synaptic strength and dynamics at glycinergic  
641 inhibitory synapses. *Brain Res Bull* 129, 50-65.
- 642 Alvarez, F.J., Dewey, D.E., Harrington, D.A., and Fyffe, R.E. (1997). Cell-type specific  
643 organization of glycine receptor clusters in the mammalian spinal cord. *J Comp Neurol* 379,  
644 150-170.
- 645 Alvarez, F.J., Taylor-Blake, B., Fyffe, R.E., De Blas, A.L., and Light, A.R. (1996). Distribution of  
646 immunoreactivity for the beta 2 and beta 3 subunits of the GABAA receptor in the mammalian  
647 spinal cord. *J Comp Neurol* 365, 392-412.
- 648 Bhumbra, G.S., Bannatyne, B.A., Watanabe, M., Todd, A.J., Maxwell, D.J., and Beato, M. (2014).  
649 The recurrent case for the Renshaw cell. *J Neurosci* 34, 12919-12932.
- 650 Broadhead, M.J., Bonthron, C., Arcinas, L., Bez, S., Zhu, F., Goff, F., Nylk, J., Dholakia, K.,  
651 Gunn-Moore, F., Grant, S.G.N., *et al.* (2020). Nanostructural Diversity of Synapses in the  
652 Mammalian Spinal Cord. *Sci Rep* 10, 8189.
- 653 Buckwalter, M.S., Cook, S.A., Davisson, M.T., White, W.F., and Camper, S.A. (1994). A  
654 frameshift mutation in the mouse alpha 1 glycine receptor gene (*Glr1*) results in progressive  
655 neurological symptoms and juvenile death. *Hum Mol Genet* 3, 2025-2030.
- 656 Chery, N., and de Koninck, Y. (1999). Junctional versus extrajunctional glycine and GABA(A)  
657 receptor-mediated IPSCs in identified lamina I neurons of the adult rat spinal cord. *J Neurosci*  
658 19, 7342-7355.
- 659 Chow, D.M., Zuchowski, K.A., and Fetcho, J.R. (2017). In vivo measurement of glycine receptor  
660 turnover and synaptic size reveals differences between functional classes of motoneurons in  
661 zebrafish. *Curr Biol* 27, 1173-1183.
- 662 Chung, S.K., Bode, A., Cushion, T.D., Thomas, R.H., Hunt, C., Wood, S.E., Pickrell, W.O.,  
663 Drew, C.J., Yamashita, S., Shiang, R., *et al.* (2013). *GLRB* is the third major gene of effect in  
664 hyperekplexia. *Hum Mol Genet* 22, 927-940.
- 665 Chung, S.K., Vanbellinghen, J.F., Mullins, J.G., Robinson, A., Hantke, J., Hammond, C.L.,  
666 Gilbert, D.F., Freilinger, M., Ryan, M., Kruer, M.C., *et al.* (2010). Pathophysiological  
667 mechanisms of dominant and recessive *GLRA1* mutations in hyperekplexia. *J Neurosci* 30,  
668 9612-9620.
- 669 Crosby, K.C., Gookin, S.E., Garcia, J.D., Hahm, K.M., Dell'Acqua, M.L., and Smith, K.R. (2019).  
670 Nanoscale subsynaptic domains underlie the organization of the inhibitory synapse. *Cell Rep*  
671 26, 3284-3297 e3283.
- 672 de Chaumont, F., Dallongeville, S., Chenouard, N., Herve, N., Pop, S., Provoost, T., Meas-Yedid,  
673 V., Pankajakshan, P., Lecomte, T., Le Montagner, Y., *et al.* (2012). Icy: an open bioimage  
674 informatics platform for extended reproducible research. *Nat Methods* 9, 690-696.
- 675 Durisic, N., Laparra-Cuervo, L., Sandoval-Alvarez, A., Borbely, J.S., and Lakadamyali, M.  
676 (2014). Single-molecule evaluation of fluorescent protein photoactivation efficiency using an in  
677 vivo nanotemplate. *Nat Methods* 11, 156-162.
- 678 Dzyubenko, E., Rozenberg, A., Hermann, D.M., and Faissner, A. (2016). Colocalization of  
679 synapse marker proteins evaluated by STED-microscopy reveals patterns of neuronal synapse  
680 distribution in vitro. *J Neurosci Methods* 273, 149-159.
- 681 Fujita, M., Sato, K., Sato, M., Inoue, T., Kozuka, T., and Tohyama, M. (1991). Regional  
682 distribution of the cells expressing glycine receptor beta subunit mRNA in the rat brain. *Brain*  
683 *Res* 560, 23-37.

- 684 Gustafsson, N., Culley, S., Ashdown, G., Owen, D.M., Pereira, P.M., and Henriques, R. (2016).  
685 Fast live-cell conventional fluorophore nanoscopy with ImageJ through super-resolution radial  
686 fluctuations. *Nat Commun* 7, 12471.
- 687 Haas, K.T., Compans, B., Letellier, M., Bartol, T.M., Grillo-Bosch, D., Sejnowski, T.J., Sainlos,  
688 M., Choquet, D., Thoumine, O., and Hossy, E. (2018). Pre-post synaptic alignment through  
689 neuroligin-1 tunes synaptic transmission efficiency. *Elife* 7.
- 690 Harvey, R.J., Depner, U.B., Wassle, H., Ahmadi, S., Heindl, C., Reinold, H., Smart, T.G., Harvey,  
691 K., Schutz, B., Abo-Salem, O.M., *et al.* (2004). GlyR alpha3: an essential target for spinal  
692 PGE2-mediated inflammatory pain sensitization. *Science* 304, 884-887.
- 693 Kim, E.Y., Schrader, N., Smolinsky, B., Bedet, C., Vannier, C., Schwarz, G., and Schindelin, H.  
694 (2006). Deciphering the structural framework of glycine receptor anchoring by gephyrin. *Embo*  
695 *J* 25, 1385-1395.
- 696 Kling, C., Koch, M., Saul, B., and Becker, C.M. (1997). The frameshift mutation oscillator  
697 (Glr1(spdt-ot)) produces a complete loss of glycine receptor alpha1-polypeptide in mouse  
698 central nervous system. *Neuroscience* 78, 411-417.
- 699 Li, Q., Lau, A., Morris, T.J., Guo, L., Fordyce, C.B., and Stanley, E.F. (2004). A syntaxin 1,  
700 Galpha(o), and N-type calcium channel complex at a presynaptic nerve terminal: analysis by  
701 quantitative immunocolocalization. *J Neurosci* 24, 4070-4081.
- 702 Lim, R., Alvarez, F.J., and Walmsley, B. (1999). Quantal size is correlated with receptor cluster  
703 area at glycinergic synapses in the rat brainstem. *J Physiol* 516 ( Pt 2), 505-512.
- 704 Liu, Y.T., Tao, C.L., Zhang, X., Xia, W., Shi, D.Q., Qi, L., Xu, C., Sun, R., Li, X.W., Lau, P.M.,  
705 *et al.* (2020). Mesophasic organization of GABA(A) receptors in hippocampal inhibitory  
706 synapses. *Nat Neurosci*.
- 707 Lorenzo, L.E., Godin, A.G., Wang, F., St-Louis, M., Carbonetto, S., Wiseman, P.W., Ribeiro-da-  
708 Silva, A., and De Koninck, Y. (2014). Gephyrin clusters are absent from small diameter  
709 primary afferent terminals despite the presence of GABA(A) receptors. *J Neurosci* 34, 8300-  
710 8317.
- 711 Lu, D.C., Niu, T., and Alaynick, W.A. (2015). Molecular and cellular development of spinal cord  
712 locomotor circuitry. *Front Mol Neurosci* 8, 25.
- 713 Lushnikova, I., Skibo, G., Muller, D., and Nikonenko, I. (2011). Excitatory synaptic activity is  
714 associated with a rapid structural plasticity of inhibitory synapses on hippocampal CA1  
715 pyramidal cells. *Neuropharmacology* 60, 757-764.
- 716 MacGillavry, Harold D., Song, Y., Raghavachari, S., and Blanpied, Thomas A. (2013). Nanoscale  
717 Scaffolding Domains within the Postsynaptic Density Concentrate Synaptic AMPA Receptors.  
718 *Neuron* 78, 615-622.
- 719 Machado, P., Rostaing, P., Guigonis, J.M., Renner, M., Dumoulin, A., Samson, M., Vannier, C.,  
720 and Triller, A. (2011). Heat shock cognate protein 70 regulates gephyrin clustering. *J Neurosci*  
721 31, 3-14.
- 722 Malosio, M.L., Marquèze-Pouey, B., Kuhse, J., and Betz, H. (1991). Widespread expression of  
723 glycine receptor subunit mRNAs in the adult and developing rat brain. *Embo j* 10, 2401-2409.
- 724 Maric, H.M., Mukherjee, J., Tretter, V., Moss, S.J., and Schindelin, H. (2011). Gephyrin-mediated  
725 gamma-aminobutyric acid type A and glycine receptor clustering relies on a common binding  
726 site. *J Biol Chem* 286, 42105-42114.
- 727 Meyer, G., Kirsch, J., Betz, H., and Langosch, D. (1995). Identification of a gephyrin binding  
728 motif on the glycine receptor beta subunit. *Neuron* 15, 563-572.
- 729 Nusser, Z., Cull-Candy, S., and Farrant, M. (1997). Differences in synaptic GABA(A) receptor  
730 number underlie variation in GABA mini amplitude. *Neuron* 19, 697-709.

- 731 Oleskevich, S., Alvarez, F.J., and Walmsley, B. (1999). Glycinergic miniature synaptic currents  
732 and receptor cluster sizes differ between spinal cord interneurons. *J Neurophysiol* 82, 312-319.
- 733 Patrizio, A., Renner, M., Pizzarelli, R., Triller, A., and Specht, C.G. (2017). Alpha subunit-  
734 dependent glycine receptor clustering and regulation of synaptic receptor numbers. *Sci Rep* 7,  
735 10899.
- 736 Pennacchiotti, F., Vascon, S., Nieuws, T., Rosillo, C., Das, S., Tyagarajan, S.K., Diaspro, A., Del  
737 Bue, A., Petrini, E.M., Barberis, A., *et al.* (2017). Nanoscale molecular reorganization of the  
738 inhibitory postsynaptic density is a determinant of GABAergic synaptic potentiation. *J*  
739 *Neurosci* 37, 1747-1756.
- 740 Peters, A., and Palay, S.L. (1996). The morphology of synapses. *J Neurocytol* 25, 687-700.
- 741 Rudolph, S., Tsai, M.C., von Gersdorff, H., and Wadiche, J.I. (2015). The ubiquitous nature of  
742 multivesicular release. *Trends Neurosci* 38, 428-438.
- 743 Santuy, A., Rodriguez, J.R., DeFelipe, J., and Merchan-Perez, A. (2018). Study of the size and  
744 shape of synapses in the juvenile rat somatosensory cortex with 3D electron microscopy.  
745 *eNeuro* 5.
- 746 Schaefer, N., Langlhofer, G., Kluck, C.J., and Villmann, C. (2013). Glycine receptor mouse  
747 mutants: model systems for human hyperekplexia. *Br J Pharmacol* 170, 933-952.
- 748 Schaefer, N., Roemer, V., Janzen, D., and Villmann, C. (2018). Impaired glycine receptor  
749 trafficking in neurological diseases. *Front Mol Neurosci* 11, 291.
- 750 Schaefer, N., Vogel, N., and Villmann, C. (2012). Glycine receptor mutants of the mouse: what  
751 are possible routes of inhibitory compensation? *Front Mol Neurosci* 5, 98.
- 752 Singer, J.H., and Berger, A.J. (1999). Contribution of single-channel properties to the time course  
753 and amplitude variance of quantal glycine currents recorded in rat motoneurons. *J*  
754 *Neurophysiol* 81, 1608-1616.
- 755 Specht, C.G. (2020). Fractional occupancy of synaptic binding sites and the molecular plasticity of  
756 inhibitory synapses. *Neuropharmacology* 169, 107493.
- 757 Specht, C.G., Izeddin, I., Rodriguez, P.C., El Beheiry, M., Rostaing, P., Darzacq, X., Dahan, M.,  
758 and Triller, A. (2013). Quantitative nanoscopy of inhibitory synapses: counting gephyrin  
759 molecules and receptor binding sites. *Neuron* 79, 308-321.
- 760 Takahashi, T. (1992). The minimal inhibitory synaptic currents evoked in neonatal rat  
761 motoneurons. *J Physiol* 450, 593-611.
- 762 Tang, A.H., Chen, H., Li, T.P., Metzbower, S.R., MacGillavry, H.D., and Blanpied, T.A. (2016).  
763 A trans-synaptic nanocolumn aligns neurotransmitter release to receptors. *Nature* 536, 210-214.
- 764 Todd, A.J., Watt, C., Spike, R.C., and Sieghart, W. (1996). Colocalization of GABA, glycine, and  
765 their receptors at synapses in the rat spinal cord. *J Neurosci* 16, 974-982.
- 766 Tokuyasu, K.T. (1973). A technique for ultracryotomy of cell suspensions and tissues. *J Cell Biol*  
767 57, 551-565.
- 768 Weltzien, F., Puller, C., O'Sullivan, G.A., Paarmann, I., and Betz, H. (2012). Distribution of the  
769 glycine receptor beta-subunit in the mouse CNS as revealed by a novel monoclonal antibody. *J*  
770 *Comp Neurol* 520, 3962-3981.
- 771 Yang, X., and Specht, C.G. (2019). Subsynaptic domains in super-resolution microscopy: The  
772 treachery of images. *Front Mol Neurosci* 12, 161.
- 773 Zeilhofer, H.U., Studler, B., Arabadzisz, D., Schweizer, C., Ahmadi, S., Layh, B., Bosl, M.R., and  
774 Fritschy, J.M. (2005). Glycinergic neurons expressing enhanced green fluorescent protein in  
775 bacterial artificial chromosome transgenic mice. *J Comp Neurol* 482, 123-141.
- 776

777 **Figures and Legends**  
778

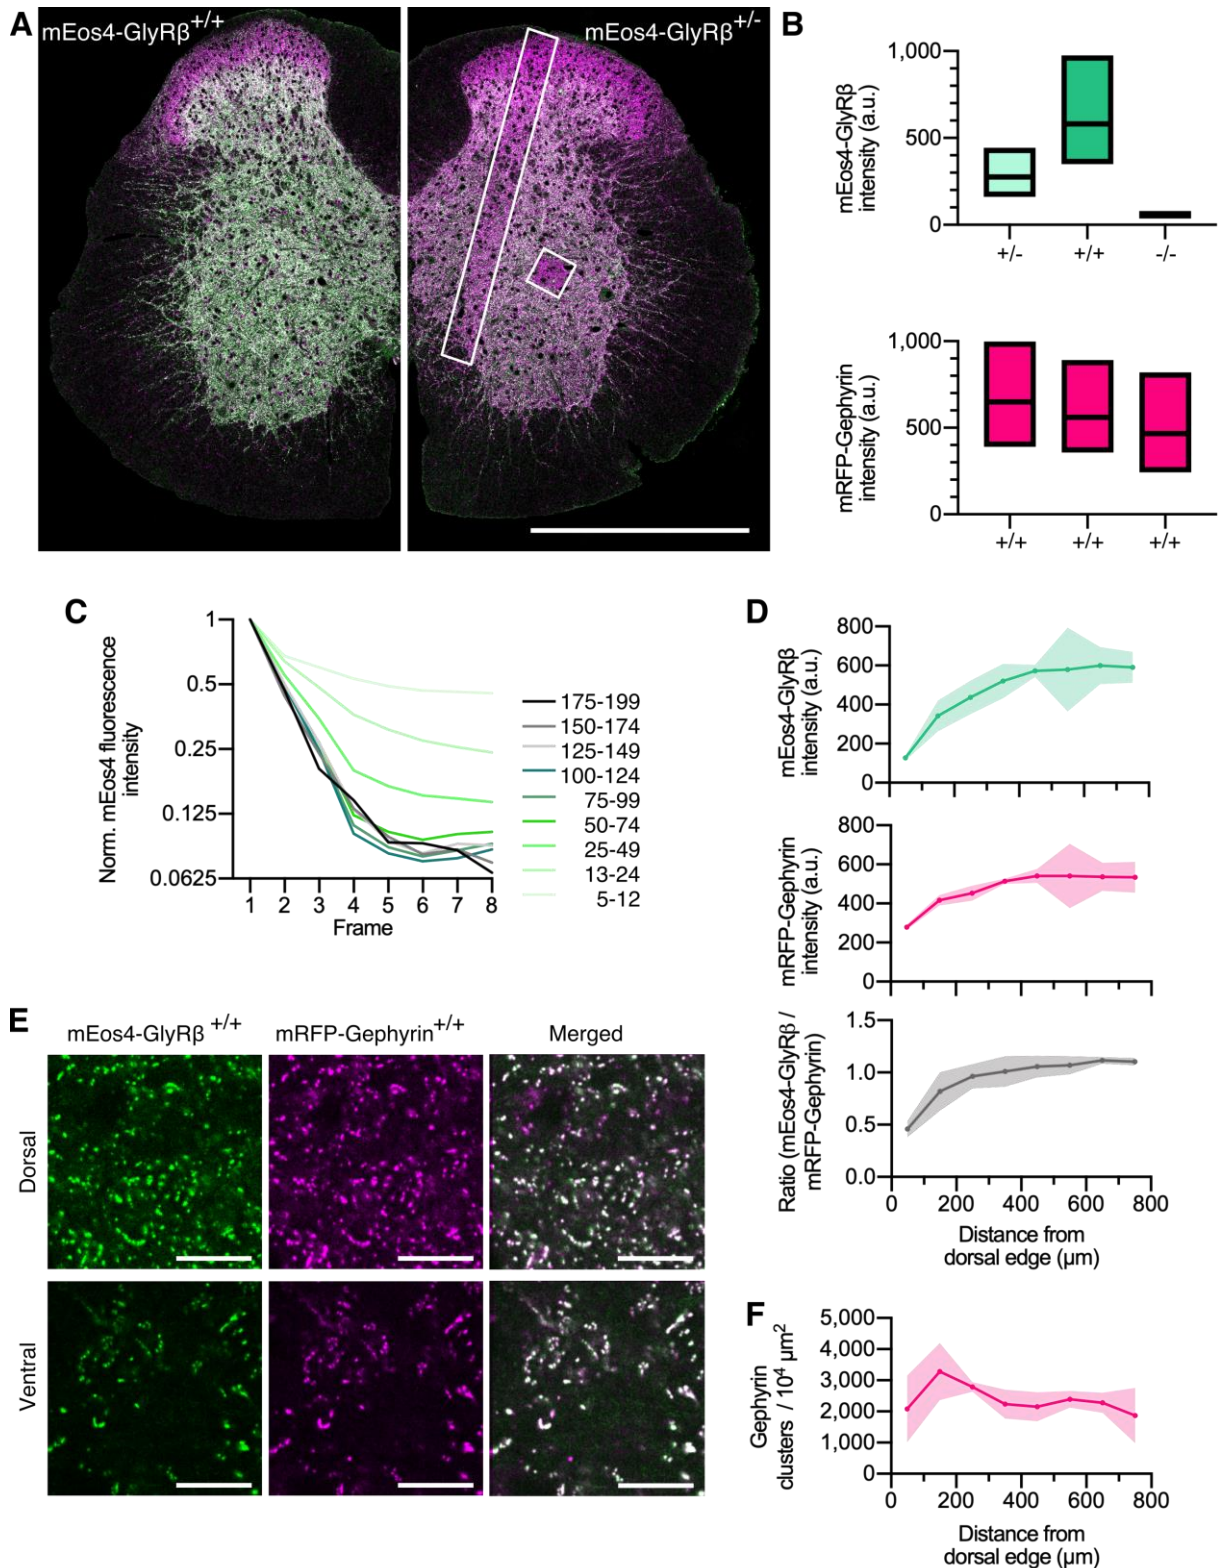

779  
780  
781  
782  
783  
784  
785

**Fig. 1. Quantitative confocal imaging.** (A) Representative confocal images of 40  $\mu$ m spinal cord tissue sections from homozygous (+/+) and heterozygous (+/-) mEos4b-GlyR $\beta$  mice (green). Both mice are homozygous for mRFP-gephyrin (magenta). Scale bar = 0.5 mm. (B) Quantification of mEos4b-GlyR $\beta$  and mRFP-gephyrin fluorescent intensity of homozygous and heterozygous 2 month old animals. Plots show median and quartiles. N = 5 images per

786 condition. (C) Normalized fluorescent decay traces of homozygous mEos4b measured in the  
787 area indicated by the white square in (A) over 8 consecutive frames. Intensities were binned  
788 in the first image and tracked on an individual synapse basis across the 8 frames. (D) Mean  
789 intensity  $\pm$  95% confidence interval of mEos4b-GlyR $\beta$  and mRFP-gephyrin measured from  
790 distal edge of spinal cord in 2 month old homozygous mice. Intensities measured in region as  
791 indicated by white rectangle in (A). N = 3 images. (E) Representative images of homozygous  
792 mEos4b-GlyR $\beta$  and mRFP-gephyrin at dorsal and ventral synapses. Scale bar = 10  $\mu$ m. (F)  
793 Quantification of numbers of gephyrin clusters across the spinal cord. Plot shows mean  $\pm$   
794 95% confidence interval. N = 3 images.  
795



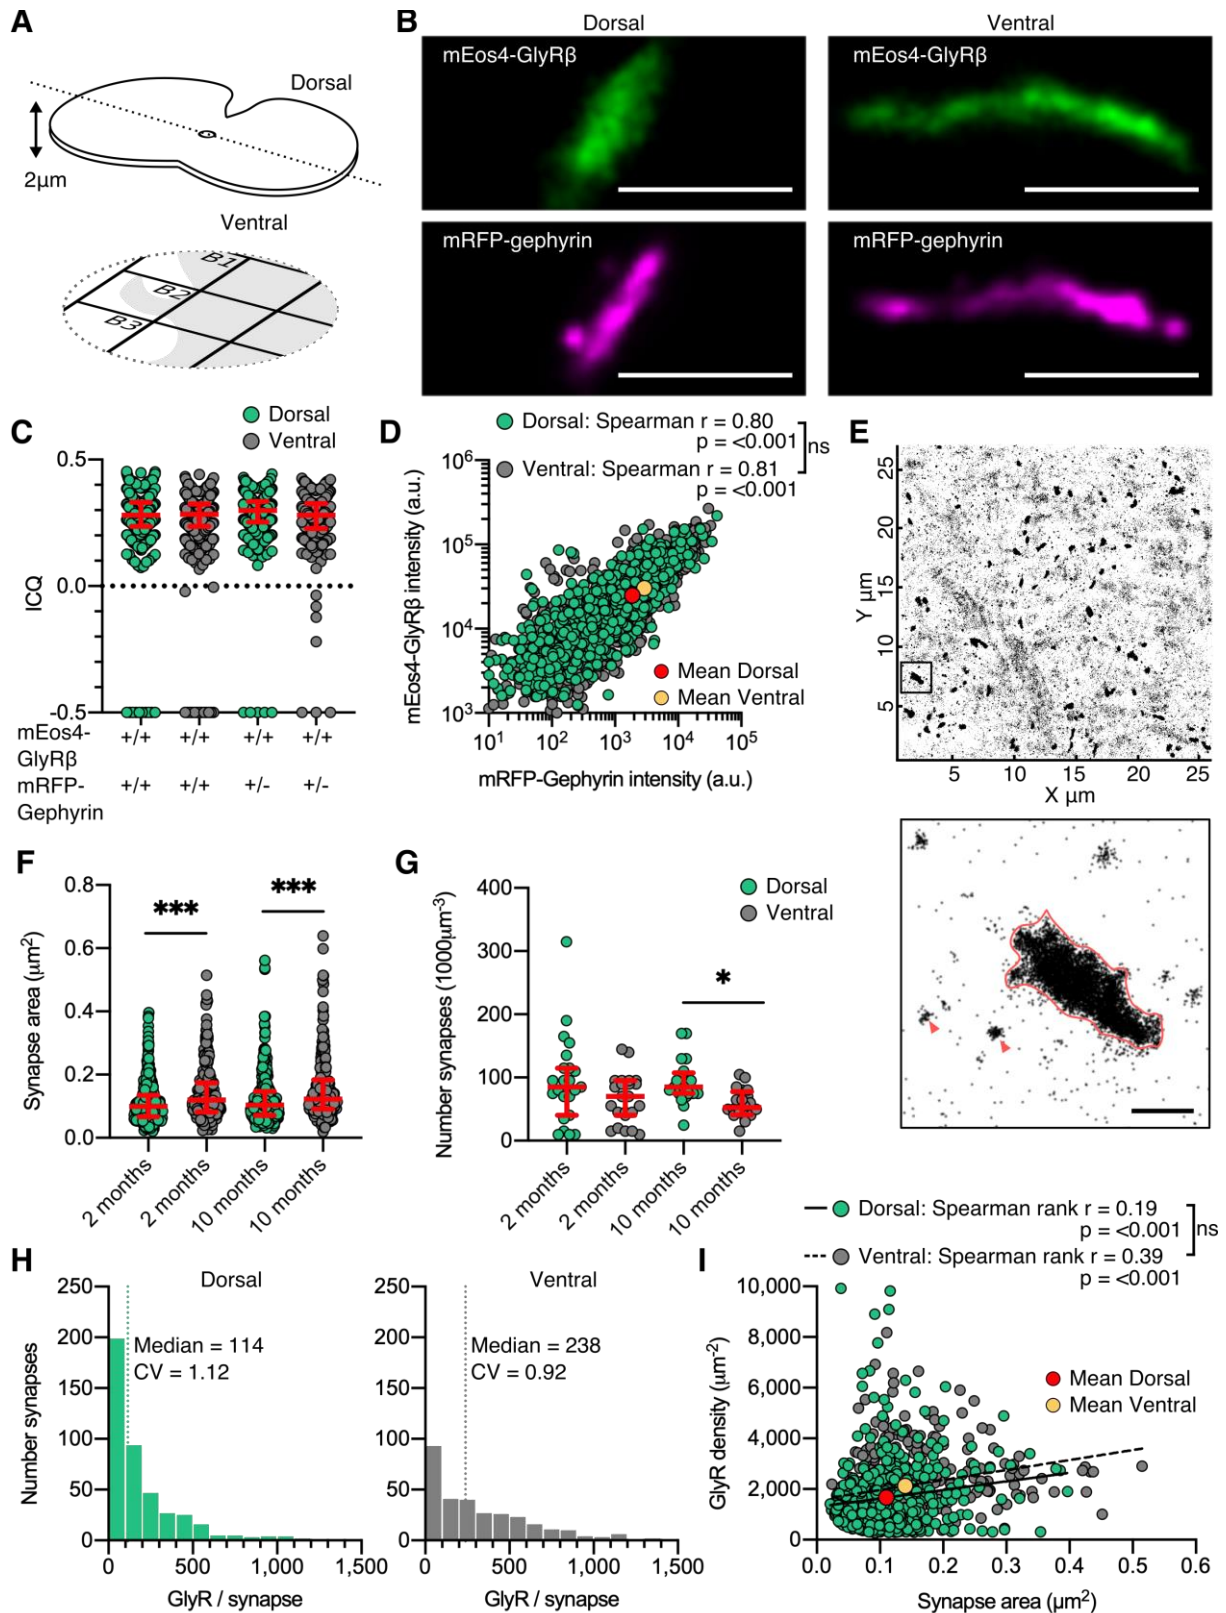

796  
797

798 **Fig. 2. Dual-color super-resolution imaging.** (A) 2  $\mu\text{m}$  cryosections of spinal cord tissue  
799 were cut from dorsal and ventral tissue and placed on gridded glass coverslips. (B)  
800 Representative SMLM reconstruction of mEos4b-GlyR $\beta$  and SRRF reconstruction of mRFP-  
801 gephyrin at single dorsal and ventral synapses. Scale bar = 500 nm. (C) Intensity correlation  
802 quotient (ICQ) of mEos4b-GlyR $\beta$  and mRFP-gephyrin in heterozygous and homozygous 2

803 month old mice. N = 357-604 synapses from 22 dorsal and 22 ventral images. (D)  
804 Quantification of GlyR-gephyrin occupancy. Non-parametric Spearman's rank shows the  
805 same positive correlation at dorsal and ventral synapses. (E) Pointillist reconstruction of  
806 mEos4b-GlyR $\beta$  detections. Insert shows a single synapse; red arrows indicate extrasynaptic  
807 receptor complexes. Scale bar = 500 nm. (F) Area of dorsal vs ventral synapses in 2 and 10  
808 month old homozygous mice. N = 234-433 synapses. Nonparametric Kruskal Wallis ANOVA  
809 with Dunn's multiple comparison test. (G) Number of synapses in dorsal and ventral tissue in  
810 2 and 10 month old homozygous mice. N = 20-23 images. Nonparametric Kruskal Wallis  
811 ANOVA with Dunn's multiple comparison test. (H) Histogram of the number of GlyRs per  
812 synapse calculated from the molecular conversion of detections (see Fig. S4 and S5). N = 433  
813 dorsal synapses and 304 ventral synapses. CV = coefficient of variation. (I) Scatter plot of  
814 GlyR density vs synapse area shows no difference between dorsal and ventral synapse  
815 densities. N = 433 dorsal synapses and 304 ventral synapses. \*p < 0.05, \*\*p < 0.01, \*\*\*p <  
816 0.001.  
817

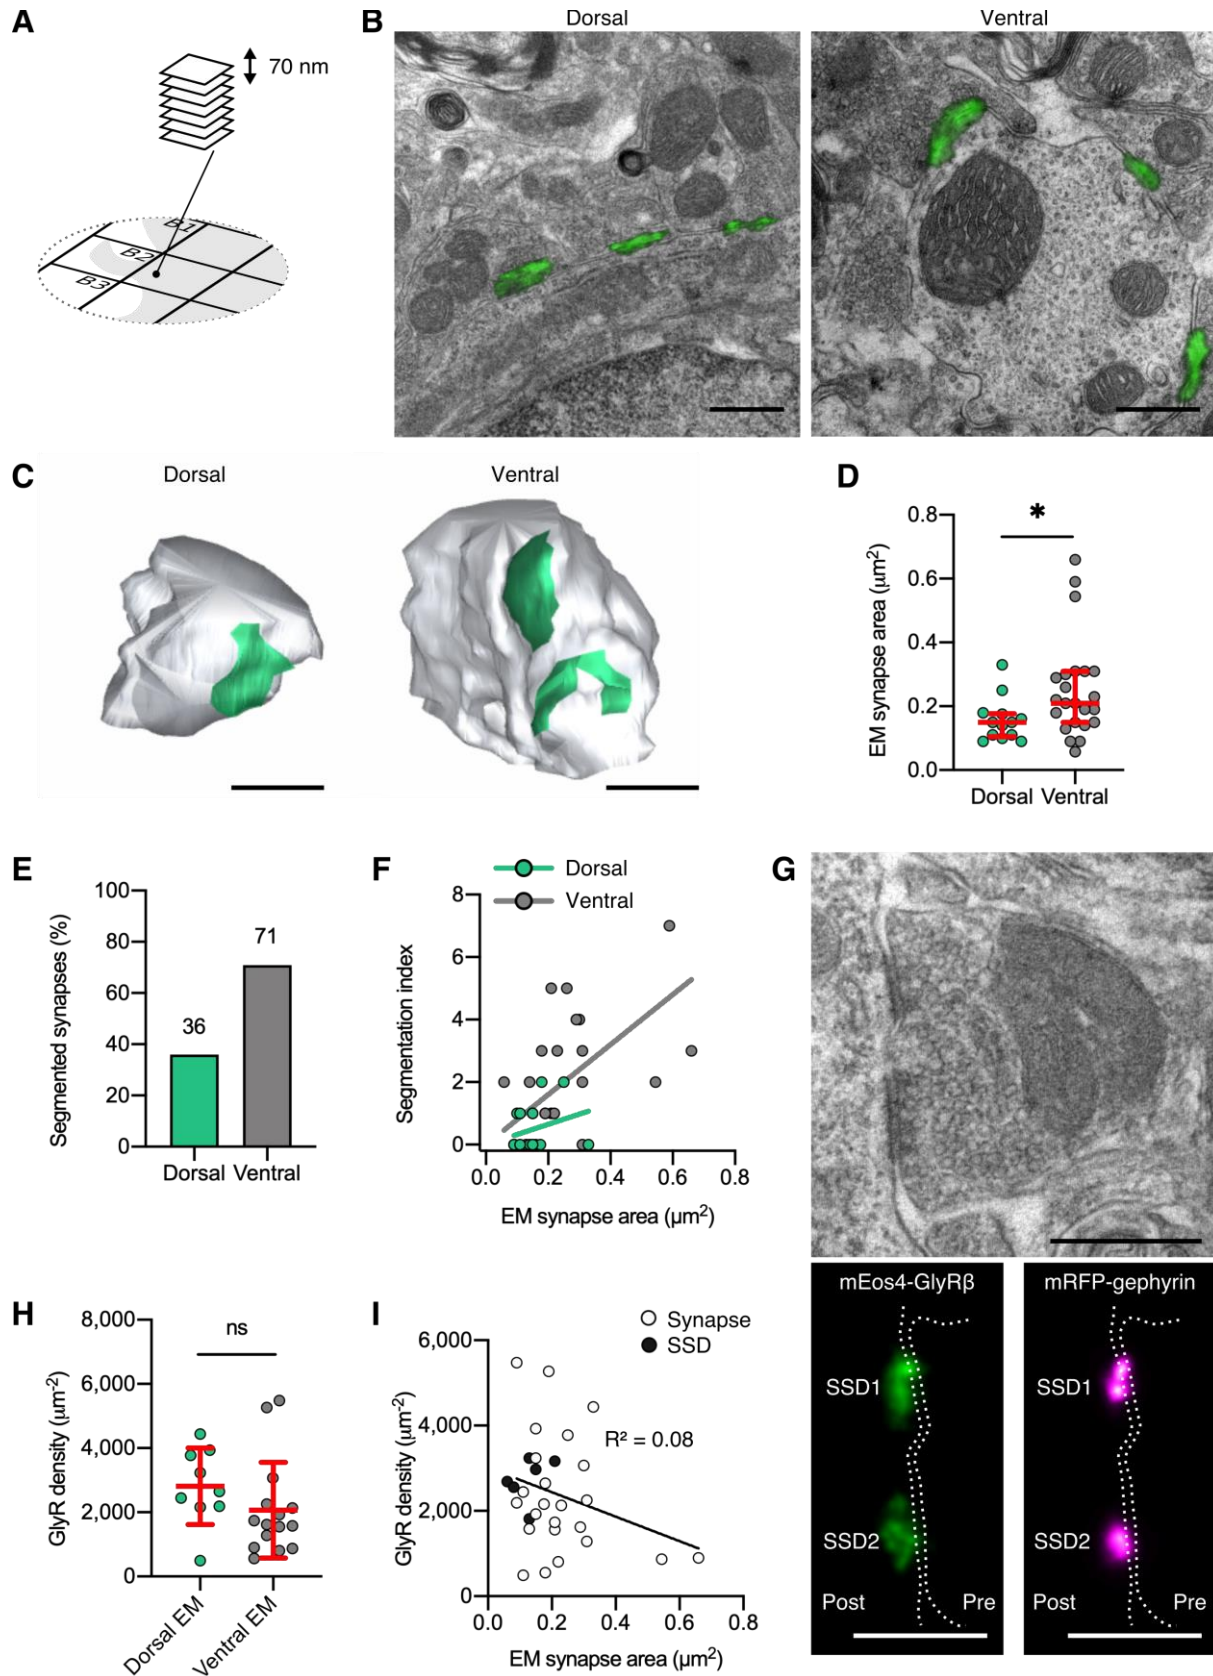

818  
819

820 **Fig. 3. Quantitative SR-CLEM.** (A) Samples used for PALM were re-sectioned as serial  
821 ultra-thin 70 nm sections for CLEM. (B) Representative dorsal and ventral synapses imaged  
822 with PALM (green) and super-imposed with their corresponding electron micrographs. Scale  
823 bar = 500 nm. (C) Representative 3D reconstructions of dorsal and ventral synapses. Green =

824 PSD, gray = presynaptic bouton. Scale bar = 500 nm. (D) Area of dorsal and ventral synapses  
825 measured by EM. Nonparametric unpaired two-tailed t-test, Mann-Whitney post hoc. (E)  
826 Percentage of total synapses measured in EM with segmented shapes. (F) Comparison of  
827 segmentation index with synaptic area in dorsal and ventral synapses. (G) Juxtaposition of a  
828 raw electron micrograph and reconstructed PALM/SRRF images of sub-synaptic domains  
829 (SSDs) in the same ventral synapse. Scale bar = 500 nm. (H) Analysis of GlyR density  
830 following correction for EM area measurements. (I) Combined scatter plot of dorsal and  
831 ventral synapse densities shows density is independent of synapse size. White = all synapses,  
832 black = SSDs. N = 13 dorsal and 23 ventral synapses. \* $p < 0.05$ , ns = not significant.

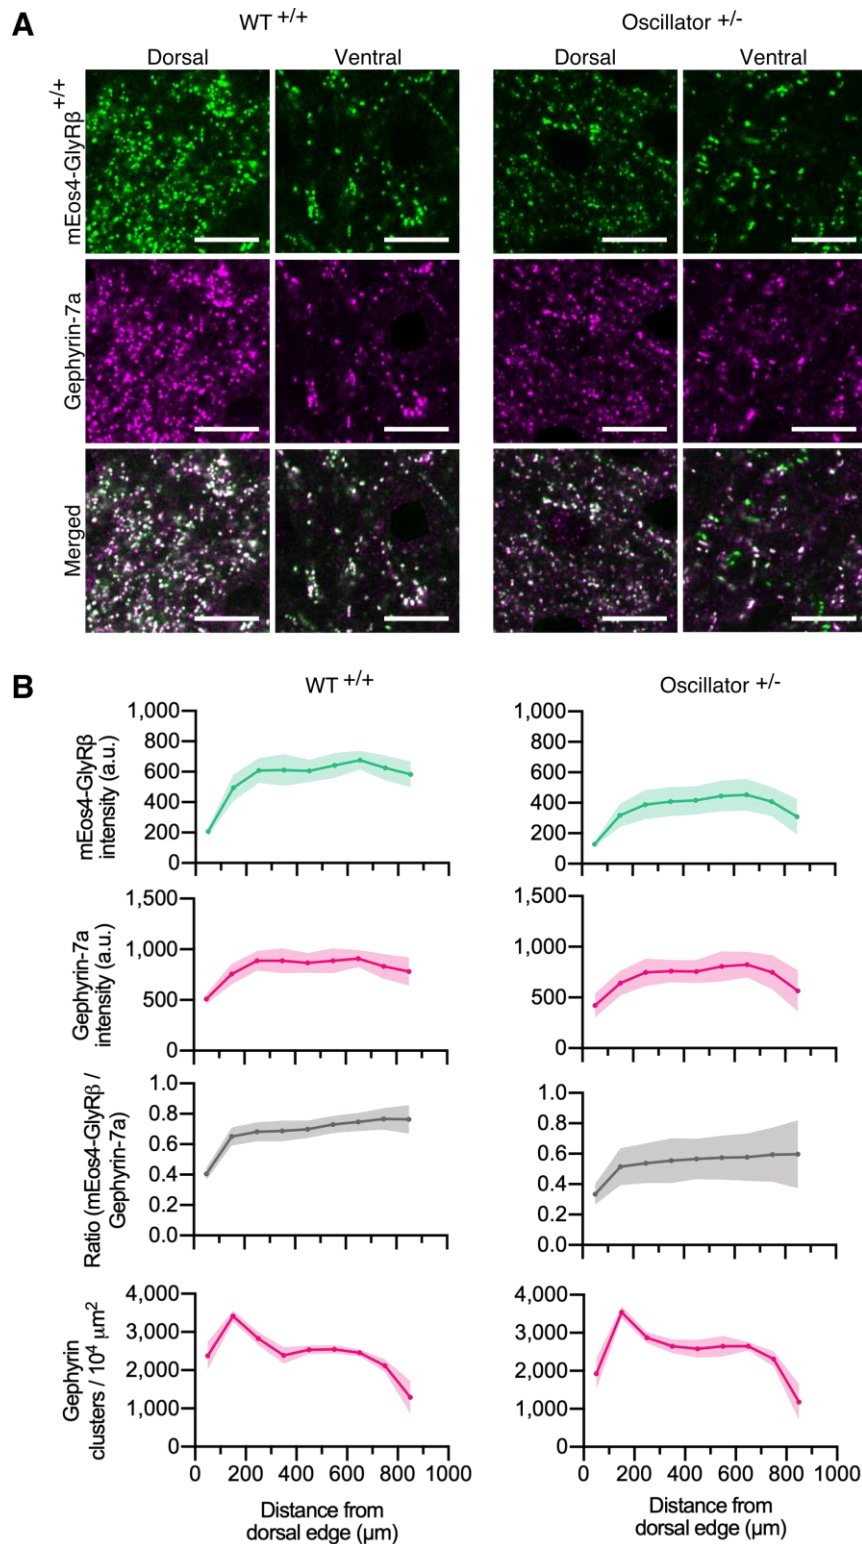

833  
834

835 **Fig. 4. Quantitative confocal imaging of the *oscillator* mouse model.** (A) Representative  
836 confocal images of dorsal and ventral synapses from heterozygous *oscillator* mice (+/-)  
837 compared to homozygous WT (+/+) littermates. All mice are homozygous for mEos4b-GlyR $\beta$   
838 (green), with gephyrin-7a immunolabeling (magenta). Scale bar = 10  $\mu\text{m}$ . (B) Mean intensity  
839  $\pm$  95% confidence interval of mEos4b-GlyR $\beta$  and gephyrin-7a at gephyrin-positive puncta,  
840 and numbers of gephyrin clusters measured from distal edge of spinal cord in 2 month old  
841 mice. N = 9-11 images per genotype.

842

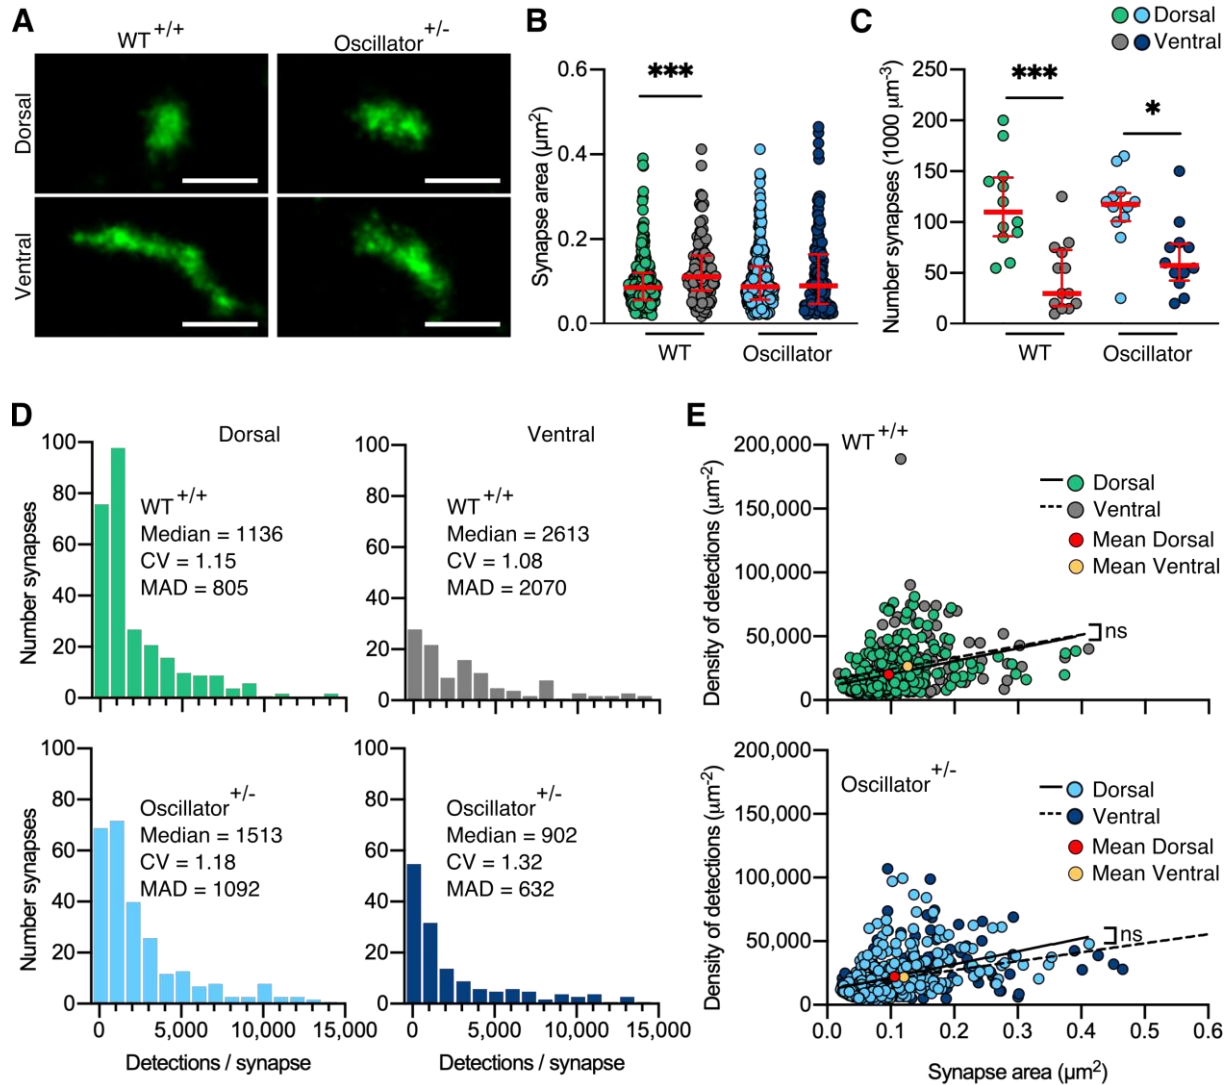

843

844

845 **Fig. 5. PALM imaging of the GlyR in the *oscillator* mouse model.** (A) Representative

846 PALM reconstructions of mEos4b-GlyR $\beta$  at single dorsal and ventral synapses in

847 heterozygous (+/-) *oscillator* and homozygous (+/+) WT littermates. Scale bar = 500 nm. (B)

848 Area of dorsal vs ventral synapses in heterozygous *oscillator* vs WT littermates. N = 120-282

849 synapses. Nonparametric Kruskal Wallis ANOVA with Dunn's multiple comparison test. (C)

850 Number of synapses in dorsal and ventral tissue in heterozygous *oscillator* vs WT mice. N =

851 12-13 images. Parametric one-way ANOVA with Tukey's multiple comparison test. (D)

852 Histogram of the number of mEos4b detections per synapse. N = 282 WT dorsal and 120

853 ventral synapses, 273 *oscillator* dorsal and 156 ventral synapses. CV = coefficient of

854 variation, MAD = median absolute deviation. (E) Scatter plots of mEos4 detection density vs

855 synapse area shows no difference between dorsal and ventral synapse densities in *oscillator*.

856 N = same as in (D). \*p < 0.05, \*\*\*p < 0.001, ns = not significant.

857
