# 1 Identification of a stereotypic molecular arrangement of 2 endogenous glycine receptors at spinal cord synapses

3  
4  
5 **Stephanie A Maynard<sup>1</sup>, Philippe Rostaing<sup>1</sup>, Natascha Schaefer<sup>2</sup>, Olivier Gemin<sup>1</sup>, Adrien  
6 Candat<sup>1</sup>, Andréa Dumoulin<sup>1</sup>, Carmen Villmann<sup>2</sup>, Antoine Triller<sup>1\*</sup>, Christian G  
7 Specht<sup>1,3\*</sup>**  
8

9 <sup>1</sup> Institut de Biologie de l'ENS (IBENS), Ecole Normale Supérieure, CNRS, Inserm,  
10 Université PSL, Paris, France

11 <sup>2</sup> Institute for Clinical Neurobiology, University Hospital, Julius-Maximilians-University,  
12 Würzburg, Germany

13 <sup>3</sup> Diseases and Hormones of the Nervous System (DHNS), Inserm, Université Paris-Saclay,  
14 Le Kremlin-Bicêtre, Paris, France

15 \* correspondence: [christian.specht@inserm.fr](mailto:christian.specht@inserm.fr), [triller@biologie.ens.fr](mailto:triller@biologie.ens.fr)  
16

## 17 **ORCID numbers:**

18 Stephanie A Maynard 0000-0002-7838-3676

19 Natascha Schaefer 0000-0001-9743-1963

20 Olivier Gemin 0000-0003-3210-7876

21 Andréa Dumoulin 0000-0003-1309-3448

22 Carmen Villmann 0000-0003-1498-6950

23 Antoine Triller 0000-0002-7530-1233

24 Christian G Specht 0000-0001-6038-7735  
25

## 26 **Short title:**

27 Quantitative SR-CLEM of glycinergic synapses  
28

## 29 **Key words**

30 single molecule localization microscopy (SMLM); glycine receptor (GlyR); gephyrin;  
31 photoactivated localization microscopy (PALM); correlative light and electron microscopy  
32 (CLEM); super-resolution CLEM (SR-CLEM); super-resolution radial fluctuation (SRRF)  
33 analysis; spinal cord; synapse; hyperekplexia; oscillator mouse model; hypomorph

## 34 **Abstract**

35 Precise quantitative information about the molecular architecture of synapses is essential to  
36 understanding the functional specificity and downstream signaling processes at specific  
37 populations of synapses. Glycine receptors (GlyRs) are the primary fast inhibitory  
38 neurotransmitter receptors in the spinal cord and brainstem. These inhibitory glycinergic  
39 networks crucially regulate motor and sensory processes. Thus far the nanoscale organization  
40 of GlyRs underlying the different network specificities has not been defined. Here, we have  
41 quantitatively characterized the molecular arrangement and ultra-structure of glycinergic  
42 synapses in spinal cord tissue using quantitative super-resolution correlative light and electron  
43 microscopy (SR-CLEM). We show that endogenous GlyRs exhibit equal receptor-scaffold  
44 occupancy and constant packing densities of about 2000 GlyRs  $\mu\text{m}^{-2}$  at synapses across the  
45 spinal cord and throughout adulthood, even though ventral horn synapses have twice the total  
46 copy numbers, larger postsynaptic domains and more convoluted morphologies than dorsal  
47 horn synapses. We demonstrate that this stereotypic molecular arrangement is maintained at  
48 glycinergic synapses in the *oscillator* mouse model of the neuromotor disease hyperekplexia  
49 despite a decrease in synapse size, indicating that the molecular organization of GlyRs is  
50 preserved in this hypomorph. We thus conclude that the morphology and size of inhibitory  
51 postsynaptic specializations rather than differences in GlyR packing determine the  
52 postsynaptic strength of glycinergic neurotransmission in motor and sensory spinal cord  
53 networks.

54

## 55 **Introduction**

56 Synaptic transmission relies on the integration of spatially and temporally controlled signals  
57 by neurotransmitter receptors in the postsynaptic membrane. The molecular arrangement of  
58 postsynaptic receptors and scaffold proteins is therefore key to the synaptic function, however  
59 the heterogeneity and complexity of postsynaptic sites has made it difficult to resolve its  
60 internal organization, to ascertain whether distinct compositional states exist, and to  
61 determine how the organization is affected in disease.

62

63 Glycine receptors (GlyRs) are the main inhibitory neurotransmitter receptors in the adult  
64 spinal cord and brainstem. Glycinergic neurons arise from different embryonic origins, with  
65 specific types of neurons residing in characteristic layers of the spinal cord (Lu et al., 2015).  
66 Depending on their location, glycinergic neurons mediate sensory and motor information in  
67 the dorsal and ventral spinal cord, respectively, which requires high reliability and fidelity of

68 transmission (Alvarez, 2017). Consequently, deficits in glycinergic transmission are involved  
69 in pain mechanisms (Harvey et al., 2004) and motor-related neurological diseases (Schaefer et  
70 al., 2018). The electrophysiological properties of glycinergic currents indicate that only a  
71 limited number of receptors are activated by the release of a single synaptic vesicle  
72 (Oleskevich et al., 1999, Singer & Berger, 1999), suggesting that the nanoscale organization  
73 of the receptors determines signal amplitude.

74

75 It has been shown that neurotransmitter receptors at excitatory and inhibitory synapses are  
76 organized within sub-synaptic domains (SSDs) that are aligned with presynaptic elements of  
77 the active zone (AZ) (Crosby et al., 2019, MacGillavry et al., 2013, Pennacchietti et al., 2017,  
78 Tang et al., 2016, Yang et al., 2021). These so-called trans-synaptic nanocolumns are thought  
79 to increase the efficacy of synaptic transmission (Haas et al., 2018). At mixed inhibitory  
80 synapses, both glycine and GABA<sub>A</sub> receptors are immobilized opposite to presynaptic release  
81 sites through direct interactions with their common scaffold protein gephyrin (Maric et al.,  
82 2011, Specht et al., 2013, Yang et al., 2021). However, accurate quantification of receptor  
83 numbers and their precise arrangement within postsynaptic sites in native tissue is lacking.  
84 Further, the question is raised as to whether the structure of glycinergic synapses varies in  
85 functionally diverse circuits of the dorsal and ventral spinal cord, if it changes over time, and  
86 if it is disturbed in GlyR pathologies such as the neuromotor disease hyperekplexia in  
87 humans. In hyperekplexic patients, mutations in the receptor subunit genes *GLRA1* and *GLRB*  
88 lead to decreased receptor availability and disturbances in glycinergic transmission, resulting  
89 in exaggerated startle reflexes, muscle hypertonia and stiffness in infancy (Chung et al., 2013,  
90 Chung et al., 2010, Schaefer et al., 2013).

91

92 To investigate whether the molecular arrangement of GlyRs may account for differences in  
93 the functional specificity of sensory and motor circuits we have quantitatively analyzed the  
94 ultra-structural organization of inhibitory synapses in spinal cord tissue. We have combined  
95 molecule counting of endogenous GlyRs using single molecule localization microscopy  
96 (SMLM) with correlative light and electron microscopic analysis (CLEM) to obtain receptor  
97 numbers as well as detailed spatial information of the synapse at the nanometer scale. We  
98 have further examined to what extent the molecular organization is maintained throughout  
99 adult development and during GlyR $\alpha$ 1-deficiency. We show that GlyRs are packed at a  
100 constant density of about 2000 receptor complexes per  $\mu\text{m}^2$  at mature synapses, suggesting  
101 that they are assembled in a stereotypic fashion. This GlyR molecular organization is

102 maintained in the hyperekplexia model *oscillator* despite a decrease in ventral synapse size,  
103 indicating that GlyR $\alpha$ 1-deficiency does not affect the integrity of the synaptic arrangement as  
104 such. Collectively, our results provide the structural basis for understanding the mechanisms  
105 underlying receptor availability and the integration of neurotransmitter-induced signals.

106

## 107 **Results**

### 108 **Generation of a KI model expressing endogenous levels of mEos4b-GlyR $\beta$**

109 In order to quantify GlyR numbers and their precise distribution at synapses we generated a  
110 knock-in (KI) mouse model expressing endogenous mEos4b-tagged GlyR $\beta$  subunits (Fig. S1).  
111 The  $\beta$ -subunit drives the synaptic localization of the receptor through direct interactions with  
112 the synaptic scaffold protein gephyrin at inhibitory synapses (Kim et al., 2006, Meyer et al.,  
113 1995). To date, labeling of GlyR $\beta$  *in situ* using immunocytochemistry has proven difficult  
114 due to a lack of reliable antibodies that recognize the native  $\beta$ -subunit (only antibodies for  
115 Western blotting recognizing the denatured protein are available), which has severely limited  
116 the study of the receptor. The coding sequence of mEos4b was inserted in exon 2 of the *Glr**b*  
117 gene by homologous recombination supported by a guide RNA (CRISPR-Cas9) to increase  
118 recombination efficiency (ICS, Illkirch, France). Specifically, the fluorophore sequence was  
119 inserted after the signal peptide and before the N-terminus of the mature GlyR $\beta$  subunit,  
120 meaning that it does not interrupt the coding sequence of the receptor (Fig. S1B). The correct  
121 insertion was confirmed by amplification and sequencing of genomic DNA. Semi-quantitative  
122 RT-PCR revealed that equal concentrations of *Glr**b*<sup>Eos</sup> and the wild-type transcript (*Glr**b*<sup>WT</sup>)  
123 are expressed in heterozygous animals. When bred to homozygosity, KI animals follow  
124 Mendelian inheritance (Fig. S2A), exhibit normal lifespans (Fig. S2B), and display no overt  
125 phenotype, suggesting that the GlyR expression and/or function are not altered.

126

127 To further confirm that GlyR function is not altered by the introduction of mEos4b, we  
128 carried out whole cell recordings in cultured spinal cord neurons of *Glr**b*<sup>WT/WT</sup> and  
129 homozygous *Glr**b*<sup>Eos/Eos</sup> animals (Fig. S2C). The agonist glycine was applied in a  
130 concentration series from 1  $\mu$ M to 300  $\mu$ M. The maximal chloride currents at saturating  
131 glycine concentrations of 300  $\mu$ M were not significantly different in *Glr**b*<sup>Eos/Eos</sup> animals,  
132 despite a minor increase in the EC<sub>50</sub> (*Glr**b*<sup>WT/WT</sup> 100  $\pm$  5  $\mu$ M, *Glr**b*<sup>Eos/Eos</sup> 130  $\pm$  9  $\mu$ M, p =  
133 0.0123 t-test). In view of the millimolar concentration of glycine present during synaptic  
134 transmission (Beato, 2008, Legendre, 1998) these data indicate that the presence of the N-

135 terminal fluorophore does not affect GlyR function under physiological conditions. Hill  
136 coefficients for *Glrb*<sup>WT/WT</sup> and *Glrb*<sup>Eos/Eos</sup> were in a range of 3.5-4, arguing for cooperativity  
137 of the subunits during glycine binding. The glycinergic origin of the chloride influx was  
138 confirmed by blocking the currents recorded in the presence of 100  $\mu$ M glycine with 10  $\mu$ M  
139 strychnine.

140

#### 141 **Quantitative confocal imaging of endogenous mEos4b-GlyR $\beta$ and mRFP-gephyrin at** 142 **spinal cord synapses in tissue**

143 To verify the expression and synaptic targeting of the mEos4b-GlyR $\beta$  protein we carried out  
144 quantitative confocal imaging in 40  $\mu$ m vibratome tissue sections. *Glrb*<sup>Eos/Eos</sup> animals were  
145 crossed with a previously established KI mouse line expressing mRFP-tagged gephyrin to  
146 visualize inhibitory postsynaptic sites (Specht et al., 2013). Since the synaptic localization of  
147 the GlyR is strictly dependent on its interaction with gephyrin (Patrizio et al., 2017), we  
148 expected a high degree of co-localization of the two proteins in the brainstem and spinal cord  
149 (Zeilhofer et al., 2005). Indeed, mEos4b-GlyR $\beta$  was widely expressed at inhibitory synapses  
150 in the thalamus, midbrain, pons and medulla (Fig. S3). Very little fluorescence was detected  
151 in the forebrain despite the high reported expression of the *Glrb* transcript (Fujita et al., 1991,  
152 Malosio et al., 1991), suggesting that protein levels are controlled by post-transcriptional  
153 mechanisms in a region-specific manner, as previously proposed (Weltzien et al., 2012).

154

155 In the spinal cord, we observed bright punctate mEos4b-GlyR $\beta$  signals throughout the gray  
156 matter, with the exception of the superficial laminae of the dorsal horn, where the intensity of  
157 the green fluorescence was markedly lower (Fig. 1A). The expression of mEos4b-GlyR $\beta$  and  
158 mRFP-gephyrin in homozygous and heterozygous animals was quantified in confocal images  
159 of thoracic and lumbar spinal cord slices at 2 months (Fig. 1B) and 10 months of age (Fig. S4).  
160 The same region of the ventral horn, indicated by the white square in Fig. 1A was taken for  
161 quantification of mEos4b-GlyR $\beta$  and mRFP-gephyrin expression in all conditions. The  
162 integrated mEos4b intensity at gephyrin-positive ventral horn synapses was exactly two times  
163 higher in *Glrb*<sup>Eos/Eos</sup> mice than in *Glrb*<sup>Eos/WT</sup>, demonstrating that both alleles are expressed  
164 with the same efficiency, and that the mEos4b fluorophore does not affect the synaptic  
165 localization of the receptor complexes. To confirm that the confocal image acquisition was in  
166 the linear dynamic range we bleached the mEos4b fluorophores by repeatedly scanning the

167 same tissue area at constant laser power (Fig. 1A, white square), which resulted in a linear  
168 decay of pixel intensities over a range of more than 20 fold (Fig. 1C).

169

170 Across the spinal cord slices, the intensity of synaptic mEos4b-GlyR $\beta$  puncta increased from  
171 dorsal to ventral both in homozygous (Fig. 1D-E) and in heterozygous animals (Fig. S4).  
172 Similarly, mRFP-gephyrin fluorescence was higher and more variable in the ventral horn,  
173 suggesting that synapses were on average about twice as big as those in the dorsal horn,  
174 despite being fewer in number (Fig. 1F, S4). The mEos4b/mRFP ratio was relatively equal  
175 across the spinal cord with the exception of the superficial layers of the dorsal horn, where  
176 GlyR levels were largely exceeded by gephyrin (Fig. 1A and D). The lower GlyR-scaffold  
177 occupancy of synapses in laminae I-III can be explained by the predominant expression of  
178 GABA<sub>A</sub>Rs that compete for receptor binding sites at these mixed inhibitory synapses  
179 (Alvarez et al., 1996, Lorenzo et al., 2014, Todd et al., 1996).

180

### 181 **Dual-color super-resolution imaging of glycinergic spinal cord synapses**

182 To quantify the observed structural differences at super-resolution, we combined radial  
183 fluctuation (SRRF) analysis of mRFP-gephyrin and photo-activated localization microscopy  
184 (PALM, a form of SMLM) of mEos4b-GlyR $\beta$  in spinal cord tissue from double KI animals.  
185 Sucrose impregnated cryosections of 2  $\mu$ m thickness were prepared from dorsal and ventral  
186 tissue and placed on gridded coverslips (Fig. 2A). SRRF and PALM images were acquired  
187 sequentially. First, mRFP signals were recorded with high intensity 561 nm laser illumination  
188 until all mRFP fluorophores were bleached (10,000 frames). mEos4b was then  
189 photoconverted with increasing 405 nm laser intensity and imaged at 561 nm for 25,000  
190 frames until all available fluorophores were exhausted. By acquiring both fluorophores,  
191 mRFP and photoconverted mEos4b, in the same emission band (607/36 nm), any chromatic  
192 misalignment between the two super-resolved images was eliminated. SRRF reconstruction  
193 was carried out on the raw mRFP image sequence and PALM images were generated from  
194 individual mEos4b detections using Gaussian peak fitting (Fig. 2B). The spatial resolution  
195 was estimated using Fourier ring correlation (FRC), which measures the similarity of two  
196 images as a function of spatial frequency by comparing the odd and even frames of the raw  
197 image sequence. According to this analysis, the spatial resolution of SRRF was 46 nm and  
198 that of PALM 21 nm. It should be noted that the synaptic puncta in the SRRF images appear  
199 somewhat smaller and brighter due to differences in the reconstruction methods that result in  
200 differences in the dynamic intensity range.



201  
202 The majority of synaptic clusters in the dual super-resolution images were small and spherical  
203 or elongated. Larger clusters displayed a variety of morphologies including elongated shapes  
204 seen in side-view (Fig. 2B) as well as convoluted structures, and were more frequently  
205 observed in the ventral horn (Fig. S5). All mEos4b-GlyR clusters closely matched the mRFP-  
206 gephyrin clusters, confirming the localization of the receptors in the postsynaptic membrane.  
207 As expected of two directly interacting synaptic components the degree of co-localization of  
208 mEos4b-GlyR $\beta$  and mRFP-gephyrin was very high, with mean intensity correlation quotients  
209 (ICQ) around 0.3 (Fig. 2C and S5), a value indicative of close spatial correlation (Li et al.,  
210 2004). Minor mismatches between the super-resolution images are explained by the fact that  
211 the majority of synapses are seen in cross-section and that the two fluorophores are located on  
212 opposite sides of the postsynaptic membrane (~30 nm distance, (Specht et al., 2013)). There  
213 were no obvious differences between the ICQ values of dorsal versus ventral synapses (0.28-  
214 0.3), indicating equivalent GlyR $\beta$ -gephyrin binding in the two regions. It should be noted that  
215 the ICQ reflects relative fluctuations between images and is not sensitive to absolute  
216 differences in signal intensities, resulting in similar ICQ values in animals that are  
217 heterozygous or homozygous for mRFP-gephyrin (Fig. 2C). Quantitative comparison of  
218 mEos4b-GlyR $\beta$  and mRFP-gephyrin intensities confirmed that the amounts of receptor and  
219 scaffold proteins are closely correlated, and that the occupancy of receptor binding sites is the  
220 same in the dorsal and ventral horn, independent of synapse size (Fig. 2D and S5). To  
221 estimate the sizes of the synapses we applied a density threshold to the PALM pointillist  
222 images and calculated the areas of the mEos4b-GlyR $\beta$  clusters (Fig. 2E). The mean synapse  
223 area in the ventral horn was larger and more variable than in the dorsal region, both in animals  
224 of 2 and 10 months of age (Fig. 2F). We also remarked that the overall number of synapses in  
225 ventral horn tissue was lower compared to the dorsal horn, significantly so by 10 months (Fig.  
226 2G, see also Fig. 1F and S4). The inverse relationship between synapse number and size is  
227 likely due to the presence of different cell types in the two regions, specifically Renshaw cells  
228 and large motor neurons in the ventral horn that require strong inhibitory control (e.g.  
229 (Bhumbra et al., 2014)).

230

### 231 **Quantification of GlyR numbers and densities at native spinal cord synapses**

232 Given that mEos4b-GlyR $\beta$  subunits are expressed at endogenous levels in *Glr $\beta$* <sup>Eos/Eos</sup> animals  
233 and that all the fluorophores were exhausted during the PALM recordings, we were able to

234 count the number of GlyRs at spinal cord synapses. The total number of mEos4b-GlyR $\beta$   
235 detections at synapses (Fig. S6) were converted into molecule numbers taking into account  
236 the blinking properties of the fluorophore and the  $\alpha_3:\beta_2$  stoichiometry of the pentameric GlyR  
237 complex (Durisic et al., 2014, Patrizio et al., 2017). To this aim, the average number of  
238 detections per fluorophore (detections/burst) and the fraction of functional fluorophores  
239 (probability of detection,  $P_{det}$ ; Fig. S7) were determined in each set of experiments using  
240 extrasynaptic receptor complexes (Fig. 2E, red arrowheads). We calculated a median copy  
241 number of 114 pentameric GlyR complexes at dorsal horn synapses and twice that number at  
242 ventral horn synapses in 2 month old animals (Fig. 2H). Copy numbers were almost identical  
243 at 10 months (Fig. S8), indicating that the glycinergic network was mature at both time points.  
244 These numbers exceed estimates derived from electrophysiological recordings in new-born,  
245 juvenile and adult rat spinal cord neurons that suggest the activation of as few as 7 and up to  
246 about 110 GlyRs during an average miniature inhibitory postsynaptic current (mIPSC) (Chery  
247 & de Koninck, 1999, Oleskevich et al., 1999, Singer & Berger, 1999, Takahashi, 1992). The  
248 high numbers of GlyRs measured by fluorophore counting therefore imply that the available  
249 receptors are not saturated by quantal release, which is likely to increase the dynamic range of  
250 postsynaptic inhibition (Alvarez, 2017).

251  
252 Our quantitative PALM data further demonstrate that differences in receptor numbers result  
253 from differences in synapse size (Fig. 2F). By combining the two parameters, we derived  
254 mean GlyR densities of  $\sim 2000 \mu\text{m}^{-2}$  (Fig. 2I, S8). Similar receptor densities of  $1250 \mu\text{m}^{-2}$  and  
255  $\sim 2000 \mu\text{m}^{-2}$  have been measured at GABAergic synapses in cerebellar stellate cells and in  
256 cultured hippocampal neurons, respectively (Liu et al., 2020, Nusser et al., 1997). We saw no  
257 differences in the GlyR packing density at dorsal and ventral horn synapses, nor did we find a  
258 clear size dependence, as determined by linear regression of all synapses (Fig. 2I) and the  
259 evolution of the coefficient of variation of GlyR density with respect to synapse area (Fig. S8).  
260 These findings are significant because they indicate that GlyR density is constant and largely  
261 independent of neuron type, embryonic origin or physiological function. Assuming that  
262 gephyrin molecules are clustered at densities of up to  $9000 \mu\text{m}^{-2}$  (Specht et al., 2013), our data  
263 also suggest that close to 50% of the receptor binding sites are occupied by GlyRs at native  
264 spinal cord synapses, in line with earlier observations of GlyR subunits that were  
265 overexpressed in cultured neurons (Patrizio et al., 2017).

266  
267



## 268 **Quantitative SR-CLEM of GlyR $\beta$ molecular organization**

269 To integrate the results of molecule counting with three-dimensional ultra-structural  
270 information and the exact synapse size, we further analyzed dorsal and ventral horn synapses  
271 by SR-CLEM. Previously imaged cryosections of *Glr $\beta$ <sup>Eos/Eos</sup>* tissue from 10 month old  
272 animals were embedded in epoxy resin, and ultra-thin (70 nm) serial sections were collected  
273 on EM slot grids with an ultramicrotome (Fig. 3A). After osmium tetroxide enhancement,  
274 electron micrographs of identified synapses were acquired in all serial sections and registered  
275 manually, using the coverslip grids and cellular structures as reference (Fig. 3B-C). All of the  
276 synapses that were both, imaged by PALM and reconstructed with EM were functionally  
277 mature, as judged by the apposition of a single presynaptic terminal containing synaptic  
278 vesicles. In line with our PALM data we found that glycinergic synapses in the ventral horn  
279 were substantially larger and more variable in size than those in the dorsal horn (Fig. 3C-D).  
280 There was good correspondence between the calculated synapse areas in the EM and PALM  
281 image reconstructions, even though PALM underestimated the sizes of some large ventral  
282 horn synapses (Fig. S9). This is probably due to the fact that a majority of synapses are tilted,  
283 and that the axial component of the area is not captured in the SMLM projections. Whereas  
284 most synapses in the dorsal horn were macular, ventral synapses were frequently composed of  
285 sub-domains (Fig. 3E-G). In agreement with earlier studies (Alvarez et al., 1997, Lushnikova  
286 et al., 2011, Santuy et al., 2018), the degree of complexity scales with the size of the  
287 postsynaptic specialization (Fig. 3F), and was taken into account for the calculation of the  
288 combined area in the EM serial sections.

289  
290 The ratio of GlyR copy numbers and the area of the inhibitory postsynaptic specialization  
291 obtained by EM resulted in average receptor densities of approximately 2000  $\mu\text{m}^{-2}$  (Fig. 3H).  
292 Consistent with our PALM estimates we did not observe significant differences between  
293 synapses in the dorsal and the ventral horn (Fig. 2I, S8). Furthermore, the GlyR packing  
294 density was not dependent on synapse size (Fig. 3I), supporting an earlier proposal (Lim et  
295 al., 1999). This suggests that GlyRs are assembled in a systematic manner, where receptor  
296 numbers increase linearly with synapse size. Since the morphological complexity of synapses  
297 increases with size, it can also be concluded that GlyR occupancy at individual sub-domains  
298 of the postsynaptic sites is uniform. GlyR densities were indeed not significantly different  
299 within sub-clusters of reconstructed synapses (Fig. 3G and I, black data points). Together,  
300 these findings point to a tight regulation of the architecture of glycinergic synapses across  
301 different molecular length scales, where GlyRs are arranged in sub-synaptic signaling units.

302

303 **GlyR packing density is unaltered in the hyperekplexia mouse model *oscillator***

304 Having identified that GlyRs have a stereotypic molecular organization that is maintained  
305 throughout adulthood and across synapses in different neuronal circuits, we questioned  
306 whether this arrangement is altered in a mouse model of hyperekplexia, a motor-related  
307 neurological disease that significantly impacts motor processing in the ventral horn of the  
308 spinal cord. The mouse mutation *oscillator* (*Glr1*<sup>spd-ot/spd-ot</sup>) is recessively inherited and  
309 causes a microdeletion and frameshift in the TM3-4 intracellular loop of the GlyR $\alpha$ 1 subunit  
310 leading to subunit truncation and subsequent loss of functional GlyRs at synapses (Kling et  
311 al., 1997). Homozygous *oscillator* mice do not live past 3 weeks of age (Buckwalter et al.,  
312 1994). In contrast, heterozygous animals have a normal lifespan and exhibit a more subtle  
313 phenotype. *Glr1*<sup>spd-ot/WT</sup> mice display an increased startle reflex and lower GlyR $\alpha$ 1 levels  
314 (Kling et al., 1997), making them a suitable model for human hyperekplexia. We generated  
315 mutant mice that were homozygous for mEos4b-GlyR $\beta$  (as described above) and  
316 heterozygous for *oscillator* (*Glr1*<sup>Eos/Eos</sup> / *Glr1*<sup>spd-ot/WT</sup>) as well as wild-type (WT) littermates  
317 (*Glr1*<sup>Eos/Eos</sup> / *Glr1*<sup>WT/WT</sup>). In these experiments, inhibitory synapses were detected by  
318 immunolabeling of endogenous gephyrin using the mAb7a antibody.

319

320 Quantitative confocal imaging in 40  $\mu$ m vibratome tissue sections showed bright punctate  
321 mEos4b-GlyR $\beta$  signals localized at synapses (Fig.4A). Across the spinal cord slices, the  
322 intensity of synaptic mEos4b-GlyR $\beta$  puncta increased from dorsal to ventral in wild-type  
323 animals (Fig. 4B), replicating the intensity profile observed previously (Fig. 1D). The  
324 intensity of synaptic mEos4b-GlyR $\beta$  puncta in heterozygous *oscillator* animals were  
325 substantially lower than those of WT littermates, which explains the reductions in membrane  
326 levels of GlyR and gephyrin previously observed by Western blotting (Kling et al., 1997).  
327 The mEos4b/gephyrin-7a ratio was relatively equal across the spinal cord with greater  
328 variation seen in *oscillator*. No ectopic GlyR $\beta$  clusters were detected, meaning that GlyRs  
329 and gephyrin always colocalized (Fig. S10). The number of gephyrin-positive synapses across  
330 the spinal cord remained unchanged between WT and *oscillator*.

331

332 Using our quantitative PALM approach, we determined the number and size of glycinergic  
333 synapses in tissue slices of dorsal and ventral spinal cord, as well as the mEos4b detection  
334 density (Fig S11), in order to understand the alterations in glycinergic synapse architecture in

335 this mutant mouse model. The detections per synapse were converted into molecule numbers  
336 as described before (Fig. S7 and S12). In WT animals we observed small and spherical dorsal  
337 synapses and larger, elongated ventral synapses, while *oscillator* synapses appeared small  
338 both in dorsal and ventral horn tissue (Fig. 5A). This was confirmed by quantitative analysis.  
339 The mean synapse area in the ventral horn was significantly larger than in the dorsal region in  
340 WT animals (Fig. 5B), in agreement with our earlier data (Fig. 2F). However, this difference  
341 was lost in *Glra1*<sup>spd-ot/WT</sup> littermates. The overall number of synapses was lower in ventral  
342 horn tissue compared to the dorsal horn in both WT and *oscillator* animals (Fig. 5C). These  
343 data suggest that the decrease in functional receptors in heterozygous *oscillator* mice  
344 manifests itself as a reduction in the size of ventral synapses.

345

346 We further quantified the total number of endogenous GlyRs at synapses (Fig. 5D) and found  
347 that the number and distribution of receptors in WT mice matched that of 2 and 10 month old  
348 WT animals analyzed previously (Fig. 2H and S8). This is remarkable considering that these  
349 experiments were performed independently and subsequent to the previous dataset, attesting  
350 to the stability of the measurements. It should also be pointed out that the GlyR copy numbers  
351 were indistinguishable from those in mRFP-gephyrin double KI animals, confirming that the  
352 presence of the fluorophores does not affect their expression and synaptic clustering. We  
353 found similar copy numbers in dorsal synapses of heterozygous *oscillator* mice compared to  
354 WT littermates, however in ventral tissue we found a shift towards lower receptor numbers  
355 per synapse, suggestive of smaller synapses. By combining the measurements of GlyR copy  
356 numbers with synapse area we could derive the receptor density. Consistent with our previous  
357 PALM data, we found a constant receptor density independent of synapse size in WT mice, as  
358 judged by the shallow slope of the linear regression (Fig. 5E). We observed a similar and  
359 constant GlyR packing density in synapses of *oscillator* mice. This suggests that despite a  
360 decrease in the total number of functional GlyRs in the heterozygous *oscillator* mouse model  
361 the molecular organization underlying receptor clustering within the synapse is maintained, in  
362 line with the lack of an overt neuromotor phenotype in these animals. In other words, the  
363 receptors are assembled stereotypically in the disease model, as in WT, with synapse size  
364 consistently scaling with receptor number. Together, our findings describe a highly regulated  
365 architecture of glycinergic synapses in both wild-type animals as well as in a model of  
366 synaptic pathology, providing a structural basis of glycinergic signaling.

367

368

369 **Discussion**

370 Combining single molecule PALM imaging, molecular counting and 3D electron microscopy  
371 we have shown that glycinergic synapses in different regions of the spinal cord follow the  
372 same structural principle, insofar as their receptor-scaffold occupancy and packing densities  
373 are the same. This uniformity extends to the sub-synaptic level. The presence of so-called  
374 sub-synaptic domains (SSDs) at inhibitory synapses has been shown by super-resolution  
375 microscopy (Crosby et al., 2019, Dzyubenko et al., 2016, Pennacchietti et al., 2017, Specht et  
376 al., 2013, Yang et al., 2021). However, it remains controversial whether the identified patterns  
377 represent the overall structure of the postsynaptic specialization itself or whether they reflect  
378 intra-synaptic variations in molecule clustering. Our quantitative SR-CLEM data lend support  
379 to the first model, whereby inhibitory postsynaptic sites in the spinal cord are composed of  
380 sub-domains that determine the distribution of the GlyRs. This organization is achieved  
381 through direct interactions between GlyRs and gephyrin, as shown by the close  
382 correspondence between the receptors and scaffold proteins. As such, the GlyR sub-clusters at  
383 spinal cord synapses do not constitute SSDs within the postsynaptic membrane in the strict  
384 sense, since they exhibit uniform binding to the synaptic scaffold (discussed in (Yang &  
385 Specht, 2019)). The stereotypic GlyR density within SSDs observed in our study supports the  
386 idea that these structures can instead be equated with the convolutions of the synaptic junction  
387 observed by EM (Alvarez et al., 1997, Lushnikova et al., 2011, Peters & Palay, 1996, Santuy  
388 et al., 2018). The formation of these convolutions is probably a consequence of gephyrin  
389 oligomerization that appears to introduce an asymmetry in the synaptic scaffold. The situation  
390 may be different at GABAergic synapses, where the co-existence of gephyrin-dependent and  
391 gephyrin-independent clustering mechanisms could lead to the formation of spatially more  
392 restricted SSDs containing different GABA<sub>A</sub>R subtypes (Pennacchietti et al., 2017, Specht,  
393 2020).

394

395 The nanoscale organization of inhibitory synapses is the same in glycinergic neurons in the  
396 dorsal and the ventral spinal cord, despite their different embryonic origins. Ventral horn  
397 synapses are generally larger, more complex and contain more GlyRs, suggesting that the size  
398 of the synapse is differentially regulated in a regional and cell type specific manner to adjust  
399 the level of glycinergic inhibition. As such, these synapses may be particularly well adapted  
400 to motor circuits, assuring strong and reliable inhibition of the postsynaptic neuron (Alvarez,  
401 2017). At the same time, the long and tortuous perimeter of the postsynaptic specialization is  
402 likely to accelerate the dynamic exchange of GlyRs and other synaptic components (Chow et

403 al., 2017, Santuy et al., 2018), thereby promoting the molecular plasticity at complex  
404 inhibitory synapses (Specht, 2020). Whether glycinergic plasticity results from transient  
405 changes in GlyR occupancy and/or from the recruitment of extrasynaptic GlyR-gephyrin  
406 complexes (Chapdelaine et al., 2021) has not been proven thus far. However, our data suggest  
407 that ultimately it is the size and complexity rather than the GlyR packing density that is  
408 dynamically regulated. It can further be argued that large and morphologically complex  
409 synapses may be particularly well adapted to integrate fast repetitive, or indeed multi-  
410 vesicular release arising from one or more presynaptic sites, thus providing a strong and  
411 reliable inhibition of the postsynaptic neuron while maintaining fast neurotransmitter  
412 clearance (discussed in (Alvarez, 2017, Rudolph et al., 2015)).

413

414 In addition, our data show that GlyR density and occupancy do not change between 2 and 10  
415 months of age, indicating that receptor clustering is fully mature by the earlier time point.  
416 Studies of normal aging of spinal cord synapses are scarce, and its effect on receptor  
417 organization has not been studied. Broadhead and colleagues (Broadhead et al., 2020) report  
418 no difference between the number of excitatory synapses in the ventral horn and only a slight  
419 increase in dorsal synapses between 2 to 9 month old mice. Broadly in line with these  
420 findings, we found no difference in the number of synapses, synapse area, and GlyR packing  
421 density in dorsal and ventral tissue between 2 and 10 months. Thus, glycinergic postsynaptic  
422 sites show considerable control over their molecular composition throughout adulthood,  
423 further emphasizing the functional significance of their synaptic architecture in both sensory  
424 and motor signaling. Our data therefore suggest that a constant GlyR density potentially  
425 provides the most efficient organization of the glycinergic postsynaptic site, while enabling  
426 the refinement of the size and complexity of the synapse due to ongoing neural activity.

427

428 Their molecular organization sets glycinergic synapses apart from excitatory synapses that do  
429 not exhibit systematic receptor clustering. Different glutamate receptors are highly variable  
430 and occupy separate sub-synaptic domains within the overall postsynaptic density (PSD)  
431 (Goncalves et al., 2020). The number of AMPARs at excitatory synapses can range from  
432 essentially zero (at silent synapses) to more than 100 (Nusser et al., 1998). Within SSDs, the  
433 average AMPAR density has been estimated at around  $5000 \mu\text{m}^{-2}$  (Goncalves et al., 2020),  
434 although the absolute values will have to be confirmed using quantitative labeling strategies  
435 such as the one described here. Interestingly, AMPAR content of SSDs was shown to vary in  
436 response to synaptic plasticity without an apparent change in SSD size (Compans et al.,

437 2021). This suggests that the packing density of AMPARs is not constant even at the  
438 nanoscale, which may be the basis for AMPAR plasticity at excitatory synapses.

439

440 The neuromotor disease hyperekplexia results from defects in glycinergic inhibition in  
441 humans. Several mouse models with analogous mutations in the *Glr1* gene recapitulate the  
442 phenotype of exaggerated startle reflexes and muscle stiffness (Schaefer et al., 2018). In  
443 general, the mutations in the various mouse models are less well tolerated than in humans and  
444 often have lethal phenotypes in homozygotes. Hyperekplexia can be recessively or  
445 dominantly inherited in humans, but neither has been shown to cause lethality. The *oscillator*  
446 mouse model, whilst lethal in the homozygous form, displays a relatively mild phenotype in  
447 heterozygous animals, with a measurable startle reflex and normal lifespan (Kling et al.,  
448 1997). Heterozygous *oscillator* therefore represents a relevant model for the subtler  
449 phenotype in humans and the long-term stability of glycinergic synapses beyond the  
450 developmental stage at which lethality occurs in homozygous animals. However, it is not  
451 known how the reduced GlyR levels in the *Glr1*<sup>spd-ot/WT</sup> hypomorph can affect (and sustain)  
452 functional motor networks. Our characterization of the molecular organization of  
453 heterozygous *oscillator* synapses shows that GlyR packing follows the same principle as in  
454 wild-type synapses, even though the total number of available functional receptors is reduced,  
455 resulting in smaller synapses in the ventral spinal cord. This further emphasizes that the  
456 stereotypic arrangement of GlyRs dictates the size of the postsynaptic domain. Most of the  
457 synapses that are formed in heterozygous *oscillator* likely achieve a size threshold capable of  
458 sustaining glycinergic signaling without serious motor defects. The lack of fundamental  
459 structural changes at glycinergic synapses further suggests that no or only limited  
460 compensatory effects take place in *oscillator*, in agreement with earlier findings that  $\alpha 1\beta$   
461 heteropentameric GlyR complexes cannot be compensated for by other subunit  
462 configurations,  $\alpha 1$ -homopentamers or GABA<sub>A</sub>Rs (Schaefer et al., 2012). Our findings thus  
463 provide a new perspective into the molecular basis of GlyR $\alpha 1$ -deficiency in an animal model  
464 of human hyperekplexia.

465

466 Taken together, our data show that dorsal and ventral synapses are distinct populations.  
467 Ventral horn synapses have much higher GlyR copy numbers, even though receptor density is  
468 not different. In contrast to the relatively compact, macular synapses in the dorsal horn,  
469 ventral horn synapses achieve a greater receptor number by enlarging the synaptic surface,



470 thus multiplying the sites of signal transmission. These region-specific glycinergic synapse  
471 morphologies are likely to underlie functional differences at sensory (dorsal) versus motor  
472 (ventral) circuits.

473

474

#### 475 **Acknowledgements**

476 SAM is supported by a Fondation pour la Recherche Médicale (FRM) postdoctoral fellowship  
477 (SPF201809007132). NS was supported by funds of the Bavarian State Ministry of Science  
478 and the Arts and the University of Würzburg to the Graduate School of Life Sciences (GSLS),  
479 University of Würzburg. Research in our laboratory at IBENS is funded by the European  
480 Research Council (ERC, Plastinhib), Agence Nationale de la Recherche (ANR, Synaptune  
481 and Syntrack), Labex (Memolife) and France-BioImaging (FBI). CV is supported by the  
482 Deutsche Forschungsgemeinschaft (DFG, VI586). We acknowledge the use of the EM  
483 platform of IBENS. We thank Pascal Legendre (ENP, Inserm) for insightful discussions and  
484 Constant Morez and Nadine Schibille for helpful comments on the manuscript. We also thank  
485 Marie-Christine Birling and Eve Geronimus from the Institut Clinique de la Souris (ICS,  
486 Illkirch, France) for the generation of the C57BL/6N-*Glr3<sup>tm1Ics</sup>* mouse line.

487

#### 488 **Author contributions**

489 SAM and CGS planned the experiments; SAM, PR, NS, OG, AC, AD, and CGS performed  
490 the experiments; SAM, PR, NS, CV and CGS analyzed the data; CV generated the oscillator  
491 strain; CV and AT secured funding; SAM and CGS wrote the manuscript; all authors read and  
492 approved the manuscript.

493

#### 494 **Declaration of interests**

495 The authors declare no competing interests.

496

#### 497 **Data and materials availability**

498 All data are available upon request.

499

500

501

502

503

## 504 **Materials and Methods**

### 505 **KI mouse model generation**

506 The knock-in (KI) mouse line C57BL/6N-*Glrb*<sup>tm1Ics</sup> (MGI:6331106) carrying the mutant allele  
507 *Glrb*<sup>tm1(Eos4)Ics</sup> (MGI:6331065) was created by homologous recombination at the Institut  
508 Clinique de la Souris (ICS, Illkirch, France). Flanked by 5' and 3' homology arms of 1.23 kb  
509 and 3.49 kb, respectively, the targeting vector encompassed exon 2 of the *Glrb* gene with an  
510 insertion of the coding sequence of mEos4b, as well as a *floxed* neomycin selection cassette  
511 containing the Cre recombinase under control of protamine promoter in intron 2-3. The  
512 selection cassette was excised in the F1 generation by germline expression of Cre, resulting in  
513 a single *loxP* site in intron 2-3 of the *Glrb* locus (Fig. S1A). The correct insertion of the  
514 mEos4b coding sequence was confirmed by sequencing of genomic *Glrb*<sup>Eos/Eos</sup> tail DNA.  
515 Genotyping was done using three primers (primer 1: TACCTTCTTGTTTTCTCTCC; primer  
516 2: GTCTGTTTTCCCTCATAAGG; primer 3: TCGCTTTTGTAATGATATGG) for the  
517 amplification of the mutant *Glrb*<sup>Eos</sup> (243 bp product) and/or the wild-type alleles (404 bp).

518

519 Purified spinal cord mRNA of *Glrb*<sup>Eos/Eos</sup>, *Glrb*<sup>Eos/WT</sup> and *Glrb*<sup>WT/WT</sup> animals was reverse  
520 transcribed (primer 6: GGAGTCTAACAGTAATCTGG), and amplified (primer 4:  
521 AGGCGCGTCAAACCTCGG; primer 5: CCATACCAACCAATGAAAGG). The correct  
522 splicing of the mutant transcript was confirmed by sequencing of amplified cDNA. For semi-  
523 quantitative RT-PCR, the *Glrb*<sup>Eos/Eos</sup> mRNA was spiked with wild-type cDNA at a ratio of  
524 1:2, 1:1 and 2:1 and amplified (Fig. S1B).

525

526 All experiments (with the exception of the data in Fig. 4, 5, S1, S2, and S10-12) were carried  
527 out with F2 animals resulting from a cross between the KI line C57BL/6N-*Glrb*<sup>tm1Ics</sup> (see  
528 above) and a KI mouse line expressing mRFP-tagged gephyrin (*Gphn*<sup>mRFP</sup>) (Machado et al.,  
529 2011) in the C57BL/6J strain, meaning that the mice had a mixed C57BL/6N x C57BL/6J  
530 genetic background.

531

532 Adult *Glr1*<sup>spt-ot</sup> mice (*oscillator*, JAX stock #000536) from Jackson Laboratories (Bar  
533 Harbor, ME, USA) were transferred to the animal facility of the Institute of Clinical  
534 Neurobiology (Würzburg, Germany). Genotyping was done using primer 7:  
535 GCCTCCGTGCTTTCTCCCTGC and primer 8: CCAGCCACGCCCAAAG for the  
536 amplification of the mutant *Glr1*<sup>spt-ot</sup> (187 bp product) and/or the wild-type alleles (194 bp).  
537 *Oscillator* mice were backcrossed into the C57BL/6J background for at least 15 generations.

538 Heterozygous *Glr*b<sup>Eos/WT</sup> animals were crossed with heterozygous *oscillator* mice for two  
539 generations giving rise to F2 heterozygous *oscillator* animals that are homozygous for the  
540 *Glr*b<sup>tm1(Eos4)Ics</sup> allele (*Glr*a1<sup>+/spd-ot</sup>/*Glr*b<sup>Eos/Eos</sup>). These animals had a mixed C57BL/6N x  
541 C57BL/6J genetic background and were used for the experiments shown in Fig. 4, 5 and S10-  
542 12.

543

544 All experiments were in accordance with European Union guidelines and approved by the  
545 local veterinary authorities. Animals at IBENS were treated in accordance with the guidelines  
546 of the French Ministry of Agriculture and Direction Départementale des Services Vétérinaires  
547 de Paris (École Normale Supérieure, Animalerie des Rongeurs, license B 75-05-20).

548 Procedures carried out at the Institute for Clinical Neurobiology were approved by the  
549 Veterinäramt der Stadt Würzburg and the Committee on the Ethics of Animal Experiments  
550 (Regierung von Unterfranken, Würzburg) and authorized under reference numbers 55.2-  
551 2531.01-09/14; 55.2.2-2532.2-949-31.

552

### 553 **Primary cultures of spinal cord neurons**

554 Cultures of mixed spinal cord neurons were prepared at embryonic day 13 (E13) from  
555 C57BL/6J wild-type *Glr*b<sup>WT/WT</sup> and *Glr*b<sup>Eos/Eos</sup> littermates. Spinal cord tissue was trypsinized  
556 in trypsin/EDTA (1 mg/ml) and DNase I (final concentration 0.1 mg/ml) for 20 min at 37°C.  
557 Trypsinization was stopped with 10% FCS. After trituration, spinal cord neurons were  
558 centrifuged at 800 rpm for 10 min. Cells were plated in a 3 cm dish on polylysine-coated  
559 coverslips at a density of 2-2.5 x 10<sup>5</sup> cells/dish. Neurons were kept at 37°C and 5% CO<sub>2</sub> in  
560 neurobasal medium containing 2 mM L-glutamine and B27 supplement (Thermo Fisher  
561 Scientific) with an exchange of half the medium after 4 days in culture.

562

### 563 **Electrophysiological recordings**

564 Spinal cord neuronal cultures at day *in vitro* 13 (DIV13) were used for patch-clamp  
565 recordings in whole-cell configuration. Currents were amplified with a EPC-10 amplifier  
566 (HEKA). A laminar flow of increasing agonist concentration (1, 10, 30, 60, 100, 300 μM  
567 glycine, and 100 μM glycine/10 μM strychnine) was applied to the suspended cell using an  
568 Octaflow II system (ALA Scientific Instruments), allowing 10-30 ms for equilibration. The  
569 external buffer for spinal cord neurons was (in mM): 142 NaCl, 8.1 KCl, 1 CaCl<sub>2</sub>, 6 MgCl<sub>2</sub>,  
570 10 glucose, 10 HEPES, pH adjusted to 7.4 with NaOH. To block neuronal excitability and  
571 ligand-gated ion channels, the external buffer was complemented with 1 μM TTX, 10 μM

572 bicuculline, 10  $\mu$ M CNQX, and 25  $\mu$ M AP-5. The internal buffer was (in mM): 153 KCl, 1  
573  $\text{MgCl}_2$ , 5 EGTA, 10 HEPES, pH adjusted to 7.4 with CsOH. Recording pipettes were  
574 fabricated from borosilicate capillaries with an open resistance of 4–6  $\text{M}\Omega$ . Currents were  
575 measured at a holding potential of -70 mV. All experiments were performed at 22°C. The  
576 mean current at each glycine concentration was determined from the peak current amplitudes  
577 measured in N = 10-11 cells per genotype from three independent preparations (biological  
578 replicates).

579

### 580 **Spinal cord and brain tissue preparation and vibratome slices**

581 Mice were sacrificed at 2 and 10 months of age by perfusion with 4% w/v paraformaldehyde  
582 (PFA; Polysciences, EM grade) and 0.1% v/v glutaraldehyde (GA; Clinisciences) in  
583 phosphate buffered saline (PBS, pH 7.4). Perfused animals were kept on ice for 30 min,  
584 followed by the dissection of the brain and spinal cord in PBS. Tissue was post-fixed in 4%  
585 w/v PFA in PBS overnight at 4 °C. Brain and spinal cord tissue was rinsed in PBS, cut into  
586 smaller segments of thoracic and lumbar regions of the spinal cord and sliced on a vibratome  
587 (Leica) at a thickness of 40  $\mu$ m (for confocal imaging) and 300  $\mu$ m (for Tokuyasu  
588 preparation), and stored in PBS at 4 °C.

589

### 590 **Confocal imaging and analysis**

591 In order to label neuronal cells in brain slices (Fig. S3) and inhibitory synapses in *oscillator*  
592 and WT littermates (Fig. 4), free-floating vibratome slices (40  $\mu$ m thickness) were blocked  
593 and permeabilized in PBS containing 0.25% Triton X100 (Sigma) and 0.1% fish gelatin  
594 (Sigma) for 1 h, and immunolabeled with either a primary antibody against NeuN (guinea pig  
595 polyclonal, 1:500 dilution, Millipore, #ABN90) or gephyrin (mouse monoclonal, mAb7a,  
596 1:500 dilution, Synaptic Systems, #147011) in PBS containing 0.1% Triton X100 and 0.1%  
597 fish gelatin overnight, followed by 3 hour incubation with Alexa Fluor 647-conjugated  
598 secondary antibody (donkey anti guinea pig, 1:1000) or Cy3-conjugated secondary antibody  
599 (goat anti mouse, 1:1000, Invitrogen) respectively.

600

601 Glass slides (Vector Laboratories) were cleaned with 70% v/v ethanol (Sigma) and vibratome  
602 sections were rinsed 3 times in PBS and mounted onto the glass slides. The glass slides were  
603 then briefly rinsed in distilled water and dried. A drop of VectaShield (Vector Laboratories)  
604 was added to each spinal cord section and covered with a #1.5 glass coverslip, which was

605 sealed with PicoDent Twinsil Speed (equal weights of catalyst and base). Slides were stored  
606 at 4 °C for confocal imaging.

607

608 Confocal imaging was carried out on a Leica SP8 TCX microscope using a Leica HC PL  
609 APO 40x/1.30 NA oil-immersion objective (Leica) and captured in 8-Bit using the Leica  
610 LAS-X software with setting HyD3. Images were captured sequentially, with laser  
611 illumination at wavelength 570 nm (mRFP, Cy3) imaged first, followed by laser illumination  
612 at 491 nm wavelength (mEos4). A cross-section from the dorsal horn to the ventral horn was  
613 imaged at a zoom of 5, speed of 25, 512 x 512 pixel (px) format. For decay analysis, 8  
614 consecutive frames were captured at a zoom of 5, speed 25, 512 x 512 px format. To tile the  
615 whole spinal cord, images were captured in at a zoom of 1, speed 100, 256 x 256 px format.

616

617 To ensure alignment of the clusters for the decay traces, images were opened in the image  
618 analysis software ICY, and the rigid registration plug-in used, taking the first frame of mRFP-  
619 gephyrin as reference. The mRFP-gephyrin/ and mEos4b-GlyR $\beta$  channels were then  
620 separated and the Spot Detector plug-in (de Chaumont et al., 2012) used to identify the  
621 clusters in each frame in the mRFP-gephyrin channel, with the identified clusters saved as a  
622 region of interest (ROI) set. Using the image analysis software FIJI, the identified mRFP-  
623 gephyrin positive cluster ROI-Set was used to identify inhibitory synapses in the first frame of  
624 the mEos4b-GlyR $\beta$  channel. These inhibitory synapses were binned based on mEos4b  
625 intensity gray levels (5-12, 13-24, 25-49, 50-74, 75-99, 100-124, 125-255) in frame 1 and a  
626 new ROI-Set generated for each bin. Using the frame 1 intensity ROI-Sets, the integrated  
627 intensity of mEos4b was then measured at individual clusters across the 8 frames. This  
628 enabled decay analysis of mEos4b intensity at synapses relative to their starting intensity, see  
629 Fig. 1C.

630

631 In order to analyze the intensity of mRFP-gephyrin and mEos4b-GlyR $\beta$  clusters within the  
632 spinal cords from mice of different genotypes, the identified mRFP-gephyrin clusters from the  
633 first frame of the decay traces (as measured by the ICY Spot Detector plug-in, see above)  
634 were used to measure the relative intensity of mRFP-gephyrin and mEos4b-GlyR $\beta$  clusters at  
635 those locations. The ROI-Set of all mRFP-gephyrin positive clusters was used in FIJI to  
636 identify inhibitory synapses, where the integrated intensity of mRFP and mEos4b was  
637 measured for each synapse (Fig. 1B).

638

639 For the cross-sectional analysis, the mRFP-gephyrin/gephyrin-7a clusters were identified  
640 across the imaged tissue using the ICY Spot Detector plug-in, as described above, and saved  
641 as an ROI-Set. In FIJI the integrated intensity of these identified clusters was measured in the  
642 mRFP-gephyrin/gephyrin-7a channel and the mEos4b-GlyR $\beta$  channel (Fig. 1D and 1F).

643

#### 644 **Cryosectioning of sucrose impregnated spinal cord tissue**

645 Sucrose impregnated cryosections were prepared using a ultracryotomy protocol adapted from  
646 (Tokuyasu, 1973). The 300  $\mu$ m spinal cord vibratome slices were transferred into a 2.3 M  
647 sucrose solution in PBS overnight at 4°C and micro-dissected to isolate gray matter of the  
648 dorsal and the ventral horn region. These fragments were placed individually on top of drops  
649 of sucrose solution on aluminium EM pins (Leica) and immediately frozen in liquid nitrogen.  
650 Sections of 2  $\mu$ m thickness were sliced on an ultramicrotome (Leica EM UC6) at -80°C and  
651 placed onto gridded coverslips (type 1.5 H, Ibsidi GmbH), covered in PBS, and stored at 4°C  
652 for a maximum of 5 days before imaging.

653

#### 654 **Single molecule localization microscopy (SMLM)**

655 Sucrose cryosections on gridded coverslips were rinsed once in PBS, and imaged in PBS.  
656 Dual-colour super resolution images were acquired on an inverted Nikon Eclipse Ti  
657 microscope with a 100x/1.49 NA oil-immersion objective, with an additional 1.5x lens in the  
658 emission path, using an Andor iXon EMCCD camera (16-Bit, 107 nm pixel size), and NIS-  
659 Elements software (Nikon). An emission filter 607/36 was chosen for imaging both mRFP-  
660 gephyrin and mEos4b-GlyR $\beta$ . Brightfield images were taken of the whole grid square  
661 identifying tissue structures. Lamp images were taken of the unconverted mEos4b-GlyR $\beta$  and  
662 mRFP-gephyrin (10 frames of 100 ms, ND8). mRFP-gephyrin movies of 10,000 frames were  
663 recorded with HiLo 561 nm continuous laser illumination (output power 50% 400 mW, 50 ms  
664 frames). This was followed by 2 min of 100% 561 nm laser illumination to ensure all mRFP-  
665 gephyrin was bleached. Movies of 25,000 frames were recorded with photoconversion of  
666 mEos4b-GlyR $\beta$  by 0.5 ms pulsed 405 nm laser illumination (gradually increased to 100% by  
667 frame 22,000) with continuous 561 nm laser illumination (output power 50% 400 mW, 50 ms  
668 frames). The focal plane was maintained using a Nikon perfect focus system.

669

670

671

672



673 **SMLM image analysis (SRRF and PALM)**

674 Frames 100-6000 of the mRFP-gephyrin movies were taken for analysis (to remove saturated  
675 frames at the beginning and bleached frames at the end) and were drift corrected and  
676 reconstructed using NanoJ-SRRF plugin for FIJI (Gustafsson et al., 2016).

677 Quantification of mEos4b-GlyR $\beta$  was carried out using a lab script for MATLAB  
678 (Mathworks). The mEos4b single fluorophores were detected by Gaussian fitting. The  
679 resulting pointillist images were drift corrected in the x/y plane using 5 dense clusters of  
680 detections over a sliding window of 2000 frames. Rendered images were produced with a  
681 pixel size of 10 nm, sigma 0.01.

682  
683 Fourier ring correlation (FRC) was used to estimate the spatial resolution, by dividing the odd  
684 and even frames of a raw mRFP-gephyrin movie and a raw mEos4b-GlyR $\beta$  movie and  
685 analyzing the resulting image stacks by SRRF and PALM, respectively. The images  
686 reconstructed from the odd and even frames were then compared using the FRC tool of the  
687 NanoJ-SQUIRREL plugin for FIJI (Culley et al., 2018).

688  
689 The mRFP-gephyrin and mEos4b-GlyR $\beta$  rendered images were aligned by rigid registration  
690 using the FIJI plug-in TurboReg. The co-localization of mRFP-gephyrin and mEos4b-GlyR $\beta$   
691 was carried out by individually cropping each synapse as separate images. The FIJI plug-in  
692 Intensity correlation quotient (ICQ) was then applied to each synapse (Li et al., 2004). The  
693 occupancy analysis was analyzed by thresholding the synapses in the mEos4b-GlyR $\beta$  images  
694 and measuring the intensity of each synapse in both channels. To analyse the PALM mEos4b-  
695 GlyR $\beta$  clusters, a lab written script for MATLAB (CountMol; (Patrizio et al., 2017)) was used  
696 to identify synapses (minimum number of detections 250, minimum cluster size 200 nm,  
697 maximum cluster size 3000 nm) and an intensity threshold of 0.1. For molecule conversion,  
698 CountMol was used to identify extrasynaptic receptor complexes (minimum number of  
699 detections 5, minimum cluster size 10 nm, maximum cluster size 120 nm). The number of  
700 detections per burst (identified as a minimum of 2 detections, with 1 burst per 1000 frames)  
701 and the probability of detection  $P_{det} = \frac{2}{N_1/N_2+2}$  were calculated, and used to convert the  
702 detections to mEos4b-GlyR $\beta$  molecules (Durisic et al., 2014, Patrizio et al., 2017), see Fig.  
703 S7.

704

705

706 **Electron microscopy (EM)**

707 Cryosections used for SMLM imaging on gridded coverslips were postfixated by incubation in  
708 1% osmium tetroxide for 1 h at 4 °C, dehydrated in graded ethanol concentrations, and  
709 embedded in araldite epoxy resin. Grid squares imaged in SMLM were identified using the  
710 grid pattern imprinted in the resin. Serial ultra-thin 70 nm sections of these regions were cut,  
711 transferred onto formvar-coated EM grids (0.432 mm slot grids) using a UC6 ultramicrotome  
712 (Leica). Sections were counterstained with 5% uranyl acetate in 70% methanol for 10 min,  
713 then washed in distilled water and air dried before observation on a Philips TECNAI 12  
714 microscope (Thermo Fisher Scientific).

715

716 For 3D synapse reconstruction, synapses were manually outlined in each serial section image  
717 using FIJI, followed by manual rotation and coarse alignment using the software GIMP, then  
718 fine alignment of the synaptic area with the Microscopy Image Browser (MIB) software. The  
719 aligned images were then opened in IMOD software to generate the 3D reconstruction.

720

721 The length of the synaptic junction of identified synapses was measured in high magnification  
722 EM images with ImageJ software. The total area of the postsynaptic surface was calculated as  
723 the cumulative length of the postsynaptic domain in the entire stack of serial sections  
724 multiplied by the thickness of each section (70 nm). The segmentation index corresponds to  
725 the number of gaps in the postsynaptic site that were detected in the x/y plane of the images or  
726 along the z-axis (i.e. an interruption of the postsynaptic site in one or several continuous  
727 sections in the stack), and represents an estimate of the morphological complexity of the  
728 synapse.

729

730 **Graphing and statistical analysis**

731 All graphing and statistical analysis was carried out using the software GraphPad Prism v.8  
732 for all except the electrophysiology experiments which were carried out in v.9. Data were  
733 tested for normality of distribution using D'Agostino-Pearson and Kolmogorov-Smirnov  
734 tests. Data is represented as dot plots with median  $\pm$  interquartile range (IQR), or histograms,  
735 unless otherwise stated. \* $p < 0.05$ , \*\*  $p < 0.01$ , \*\*\*  $p < 0.001$ , ns = not significant.

736

737 **References**

- 738 Alvarez FJ (2017) Gephyrin and the regulation of synaptic strength and dynamics at glycinergic inhibitory  
739 synapses. *Brain Res Bull* 129: 50-65
- 740 Alvarez FJ, Dewey DE, Harrington DA, Fyffe RE (1997) Cell-type specific organization of glycine receptor  
741 clusters in the mammalian spinal cord. *J Comp Neurol* 379: 150-70
- 742 Alvarez FJ, Taylor-Blake B, Fyffe RE, De Blas AL, Light AR (1996) Distribution of immunoreactivity for the  
743 beta 2 and beta 3 subunits of the GABAA receptor in the mammalian spinal cord. *J Comp Neurol* 365: 392-  
744 412
- 745 Beato M (2008) The time course of transmitter at glycinergic synapses onto motoneurons. *J Neurosci* 28: 7412-  
746 25
- 747 Bhumbra GS, Bannatyne BA, Watanabe M, Todd AJ, Maxwell DJ, Beato M (2014) The recurrent case for the  
748 Renshaw cell. *J Neurosci* 34: 12919-32
- 749 Broadhead MJ, Bonthron C, Arcinas L, Bez S, Zhu F, Goff F, Nylk J, Dholakia K, Gunn-Moore F, Grant SGN,  
750 Miles GB (2020) Nanostructural Diversity of Synapses in the Mammalian Spinal Cord. *Sci Rep* 10: 8189
- 751 Buckwalter MS, Cook SA, Davisson MT, White WF, Camper SA (1994) A frameshift mutation in the mouse  
752 alpha 1 glycine receptor gene (*Glr1*) results in progressive neurological symptoms and juvenile death. *Hum*  
753 *Mol Genet* 3: 2025-30
- 754 Chapdelaine T, Hakim V, Triller A, Ranft J, Specht CG (2021) Reciprocal stabilization of glycine receptors and  
755 gephyrin scaffold proteins at inhibitory synapses. *Biophys J* 120: 805-817
- 756 Chery N, de Koninck Y (1999) Junctional versus extrajunctional glycine and GABA(A) receptor-mediated  
757 IPSCs in identified lamina I neurons of the adult rat spinal cord. *J Neurosci* 19: 7342-55
- 758 Chow DM, Zuchowski KA, Fetcho JR (2017) In vivo measurement of glycine receptor turnover and synaptic  
759 size reveals differences between functional classes of motoneurons in zebrafish. *Curr Biol* 27: 1173-1183
- 760 Chung SK, Bode A, Cushion TD, Thomas RH, Hunt C, Wood SE, Pickrell WO, Drew CJ, Yamashita S, Shiang  
761 R, Leiz S, Longardt AC, Raile V, Weschke B, Puri RD, Verma IC, Harvey RJ, Ratnasinghe DD, Parker M,  
762 Rittey C et al. (2013) *GLRB* is the third major gene of effect in hyperekplexia. *Hum Mol Genet* 22: 927-40
- 763 Chung SK, Vanbellinghen JF, Mullins JG, Robinson A, Hantke J, Hammond CL, Gilbert DF, Freilinger M,  
764 Ryan M, Kruer MC, Masri A, Gurses C, Ferrie C, Harvey K, Shiang R, Christodoulou J, Andermann F,  
765 Andermann E, Thomas RH, Harvey RJ et al. (2010) Pathophysiological mechanisms of dominant and  
766 recessive *GLRA1* mutations in hyperekplexia. *J Neurosci* 30: 9612-20
- 767 Compans B, Camus C, Kallergi E, Sposini S, Martineau M, Butler C, Kechkar A, Klaassen RV, Retailleau N,  
768 Sejnowski TJ, Smit AB, Sibarita JB, Bartol TM, Jr., Perrais D, Nikolettou V, Choquet D, Hosi E (2021)  
769 NMDAR-dependent long-term depression is associated with increased short term plasticity through  
770 autophagy mediated loss of PSD-95. *Nat Commun* 12: 2849
- 771 Crosby KC, Gookin SE, Garcia JD, Hahm KM, Dell'Acqua ML, Smith KR (2019) Nanoscale subsynaptic  
772 domains underlie the organization of the inhibitory synapse. *Cell Rep* 26: 3284-3297 e3
- 773 Culley S, Albrecht D, Jacobs C, Pereira PM, Leterrier C, Mercer J, Henriques R (2018) Quantitative mapping  
774 and minimization of super-resolution optical imaging artifacts. *Nat Methods* 15: 263-266
- 775 de Chaumont F, Dallongeville S, Chenouard N, Herve N, Pop S, Provoost T, Meas-Yedid V, Pankajakshan P,  
776 Lecomte T, Le Montagner Y, Lagache T, Dufour A, Olivo-Marin JC (2012) Icy: an open bioimage  
777 informatics platform for extended reproducible research. *Nat Methods* 9: 690-6
- 778 Durisic N, Laparra-Cuervo L, Sandoval-Alvarez A, Borbely JS, Lakadamyali M (2014) Single-molecule  
779 evaluation of fluorescent protein photoactivation efficiency using an in vivo nanotemplate. *Nat Methods* 11:  
780 156-62
- 781 Dzyubenko E, Rozenberg A, Hermann DM, Faissner A (2016) Colocalization of synapse marker proteins  
782 evaluated by STED-microscopy reveals patterns of neuronal synapse distribution in vitro. *J Neurosci*  
783 *Methods* 273: 149-159
- 784 Fujita M, Sato K, Sato M, Inoue T, Kozuka T, Tohyama M (1991) Regional distribution of the cells expressing  
785 glycine receptor beta subunit mRNA in the rat brain. *Brain Res* 560: 23-37
- 786 Goncalves J, Bartol TM, Camus C, Levet F, Menegolla AP, Sejnowski TJ, Sibarita JB, Vivaudou M, Choquet D,  
787 Hosi E (2020) Nanoscale co-organization and coactivation of AMPAR, NMDAR, and mGluR at excitatory  
788 synapses. *Proc Natl Acad Sci U S A* 117: 14503-14511
- 789 Gustafsson N, Culley S, Ashdown G, Owen DM, Pereira PM, Henriques R (2016) Fast live-cell conventional  
790 fluorophore nanoscopy with ImageJ through super-resolution radial fluctuations. *Nat Commun* 7: 12471

- 791 Haas KT, Compans B, Letellier M, Bartol TM, Grillo-Bosch D, Sejnowski TJ, Sainlos M, Choquet D, Thoumine  
792 O, Hossy E (2018) Pre-post synaptic alignment through neuroligin-1 tunes synaptic transmission efficiency.  
793 *Elife* 7
- 794 Harvey RJ, Depner UB, Wassle H, Ahmadi S, Heindl C, Reinold H, Smart TG, Harvey K, Schutz B, Abo-Salem  
795 OM, Zimmer A, Poisbeau P, Welzl H, Wolfer DP, Betz H, Zeilhofer HU, Muller U (2004) GlyR alpha3: an  
796 essential target for spinal PGE2-mediated inflammatory pain sensitization. *Science* 304: 884-7
- 797 Kim EY, Schrader N, Smolinsky B, Bedet C, Vannier C, Schwarz G, Schindelin H (2006) Deciphering the  
798 structural framework of glycine receptor anchoring by gephyrin. *Embo J* 25: 1385-95
- 799 Kling C, Koch M, Saul B, Becker CM (1997) The frameshift mutation oscillator (Glr1(spdl-ot)) produces a  
800 complete loss of glycine receptor alpha1-polypeptide in mouse central nervous system. *Neuroscience* 78:  
801 411-7
- 802 Legendre P (1998) A reluctant gating mode of glycine receptor channels determines the time course of inhibitory  
803 miniature synaptic events in zebrafish hindbrain neurons. *J Neurosci* 18: 2856-70
- 804 Li Q, Lau A, Morris TJ, Guo L, Fordyce CB, Stanley EF (2004) A syntaxin 1, Alpha(o), and N-type calcium  
805 channel complex at a presynaptic nerve terminal: analysis by quantitative immunocolocalization. *J Neurosci*  
806 24: 4070-81
- 807 Lim R, Alvarez FJ, Walmsley B (1999) Quantal size is correlated with receptor cluster area at glycinergic  
808 synapses in the rat brainstem. *J Physiol* 516 ( Pt 2): 505-12
- 809 Liu YT, Tao CL, Zhang X, Xia W, Shi DQ, Qi L, Xu C, Sun R, Li XW, Lau PM, Zhou ZH, Bi GQ (2020)  
810 Mesophasic organization of GABA(A) receptors in hippocampal inhibitory synapses. *Nat Neurosci*
- 811 Lorenzo LE, Godin AG, Wang F, St-Louis M, Carbonetto S, Wiseman PW, Ribeiro-da-Silva A, De Koninck Y  
812 (2014) Gephyrin clusters are absent from small diameter primary afferent terminals despite the presence of  
813 GABA(A) receptors. *J Neurosci* 34: 8300-17
- 814 Lu DC, Niu T, Alaynick WA (2015) Molecular and cellular development of spinal cord locomotor circuitry.  
815 *Front Mol Neurosci* 8: 25
- 816 Lushnikova I, Skibo G, Muller D, Nikonenko I (2011) Excitatory synaptic activity is associated with a rapid  
817 structural plasticity of inhibitory synapses on hippocampal CA1 pyramidal cells. *Neuropharmacology* 60:  
818 757-64
- 819 MacGillavry Harold D, Song Y, Raghavachari S, Blanpied Thomas A (2013) Nanoscale Scaffolding Domains  
820 within the Postsynaptic Density Concentrate Synaptic AMPA Receptors. *Neuron* 78: 615-622
- 821 Machado P, Rostaing P, Guigonis JM, Renner M, Dumoulin A, Samson M, Vannier C, Triller A (2011) Heat  
822 shock cognate protein 70 regulates gephyrin clustering. *J Neurosci* 31: 3-14
- 823 Malosio ML, Marquèze-Pouey B, Kuhse J, Betz H (1991) Widespread expression of glycine receptor subunit  
824 mRNAs in the adult and developing rat brain. *Embo j* 10: 2401-9
- 825 Maric HM, Mukherjee J, Tretter V, Moss SJ, Schindelin H (2011) Gephyrin-mediated gamma-aminobutyric acid  
826 type A and glycine receptor clustering relies on a common binding site. *J Biol Chem* 286: 42105-14
- 827 Meyer G, Kirsch J, Betz H, Langosch D (1995) Identification of a gephyrin binding motif on the glycine  
828 receptor beta subunit. *Neuron* 15: 563-72
- 829 Nusser Z, Cull-Candy S, Farrant M (1997) Differences in synaptic GABA(A) receptor number underlie variation  
830 in GABA mini amplitude. *Neuron* 19: 697-709
- 831 Nusser Z, Lujan R, Laube G, Roberts JD, Molnar E, Somogyi P (1998) Cell type and pathway dependence of  
832 synaptic AMPA receptor number and variability in the hippocampus. *Neuron* 21: 545-59
- 833 Oleskevich S, Alvarez FJ, Walmsley B (1999) Glycinergic miniature synaptic currents and receptor cluster sizes  
834 differ between spinal cord interneurons. *J Neurophysiol* 82: 312-9
- 835 Patrizio A, Renner M, Pizzarelli R, Triller A, Specht CG (2017) Alpha subunit-dependent glycine receptor  
836 clustering and regulation of synaptic receptor numbers. *Sci Rep* 7: 10899
- 837 Pennacchietti F, Vascon S, Nieuws T, Rosillo C, Das S, Tyagarajan SK, Diaspro A, Del Bue A, Petrini EM,  
838 Barberis A, Cella Zanacchi F (2017) Nanoscale molecular reorganization of the inhibitory postsynaptic  
839 density is a determinant of GABAergic synaptic potentiation. *J Neurosci* 37: 1747-1756
- 840 Peters A, Palay SL (1996) The morphology of synapses. *J Neurocytol* 25: 687-700
- 841 Rudolph S, Tsai MC, von Gersdorff H, Wadiche JI (2015) The ubiquitous nature of multivesicular release.  
842 *Trends Neurosci* 38: 428-38
- 843 Santuy A, Rodriguez JR, DeFelipe J, Merchán-Pérez A (2018) Study of the size and shape of synapses in the  
844 juvenile rat somatosensory cortex with 3D electron microscopy. *eNeuro* 5

- 845 Schaefer N, Langhofer G, Kluck CJ, Villmann C (2013) Glycine receptor mouse mutants: model systems for  
846 human hyperekplexia. *Br J Pharmacol* 170: 933-52
- 847 Schaefer N, Roemer V, Janzen D, Villmann C (2018) Impaired glycine receptor trafficking in neurological  
848 diseases. *Front Mol Neurosci* 11: 291
- 849 Schaefer N, Vogel N, Villmann C (2012) Glycine receptor mutants of the mouse: what are possible routes of  
850 inhibitory compensation? *Front Mol Neurosci* 5: 98
- 851 Singer JH, Berger AJ (1999) Contribution of single-channel properties to the time course and amplitude variance  
852 of quantal glycine currents recorded in rat motoneurons. *J Neurophysiol* 81: 1608-16
- 853 Specht CG (2020) Fractional occupancy of synaptic binding sites and the molecular plasticity of inhibitory  
854 synapses. *Neuropharmacology* 169: 107493
- 855 Specht CG, Izeddin I, Rodriguez PC, El Beheiry M, Rostaing P, Darzacq X, Dahan M, Triller A (2013)  
856 Quantitative nanoscopy of inhibitory synapses: counting gephyrin molecules and receptor binding sites.  
857 *Neuron* 79: 308-21
- 858 Takahashi T (1992) The minimal inhibitory synaptic currents evoked in neonatal rat motoneurons. *J Physiol*  
859 450: 593-611
- 860 Tang AH, Chen H, Li TP, Metzbower SR, MacGillavry HD, Blanpied TA (2016) A trans-synaptic nanocolumn  
861 aligns neurotransmitter release to receptors. *Nature* 536: 210-4
- 862 Todd AJ, Watt C, Spike RC, Sieghart W (1996) Colocalization of GABA, glycine, and their receptors at  
863 synapses in the rat spinal cord. *J Neurosci* 16: 974-82
- 864 Tokuyasu KT (1973) A technique for ultracyotomy of cell suspensions and tissues. *J Cell Biol* 57: 551-65
- 865 Weltzien F, Puller C, O'Sullivan GA, Paarmann I, Betz H (2012) Distribution of the glycine receptor beta-  
866 subunit in the mouse CNS as revealed by a novel monoclonal antibody. *J Comp Neurol* 520: 3962-81
- 867 Yang X, Le Corrionc H, Legendre P, Triller A, Specht CG (2021) Differential regulation of glycinergic and  
868 GABAergic nanocolumns at mixed inhibitory synapses. *EMBO Rep* 22: e52154
- 869 Yang X, Specht CG (2019) Subsynaptic domains in super-resolution microscopy: The treachery of images. *Front*  
870 *Mol Neurosci* 12: 161
- 871 Zeilhofer HU, Studler B, Arabadzisz D, Schweizer C, Ahmadi S, Layh B, Bosl MR, Fritschy JM (2005)  
872 Glycinergic neurons expressing enhanced green fluorescent protein in bacterial artificial chromosome  
873 transgenic mice. *J Comp Neurol* 482: 123-41
- 874
- 875



876 **Figures and Legends**  
877

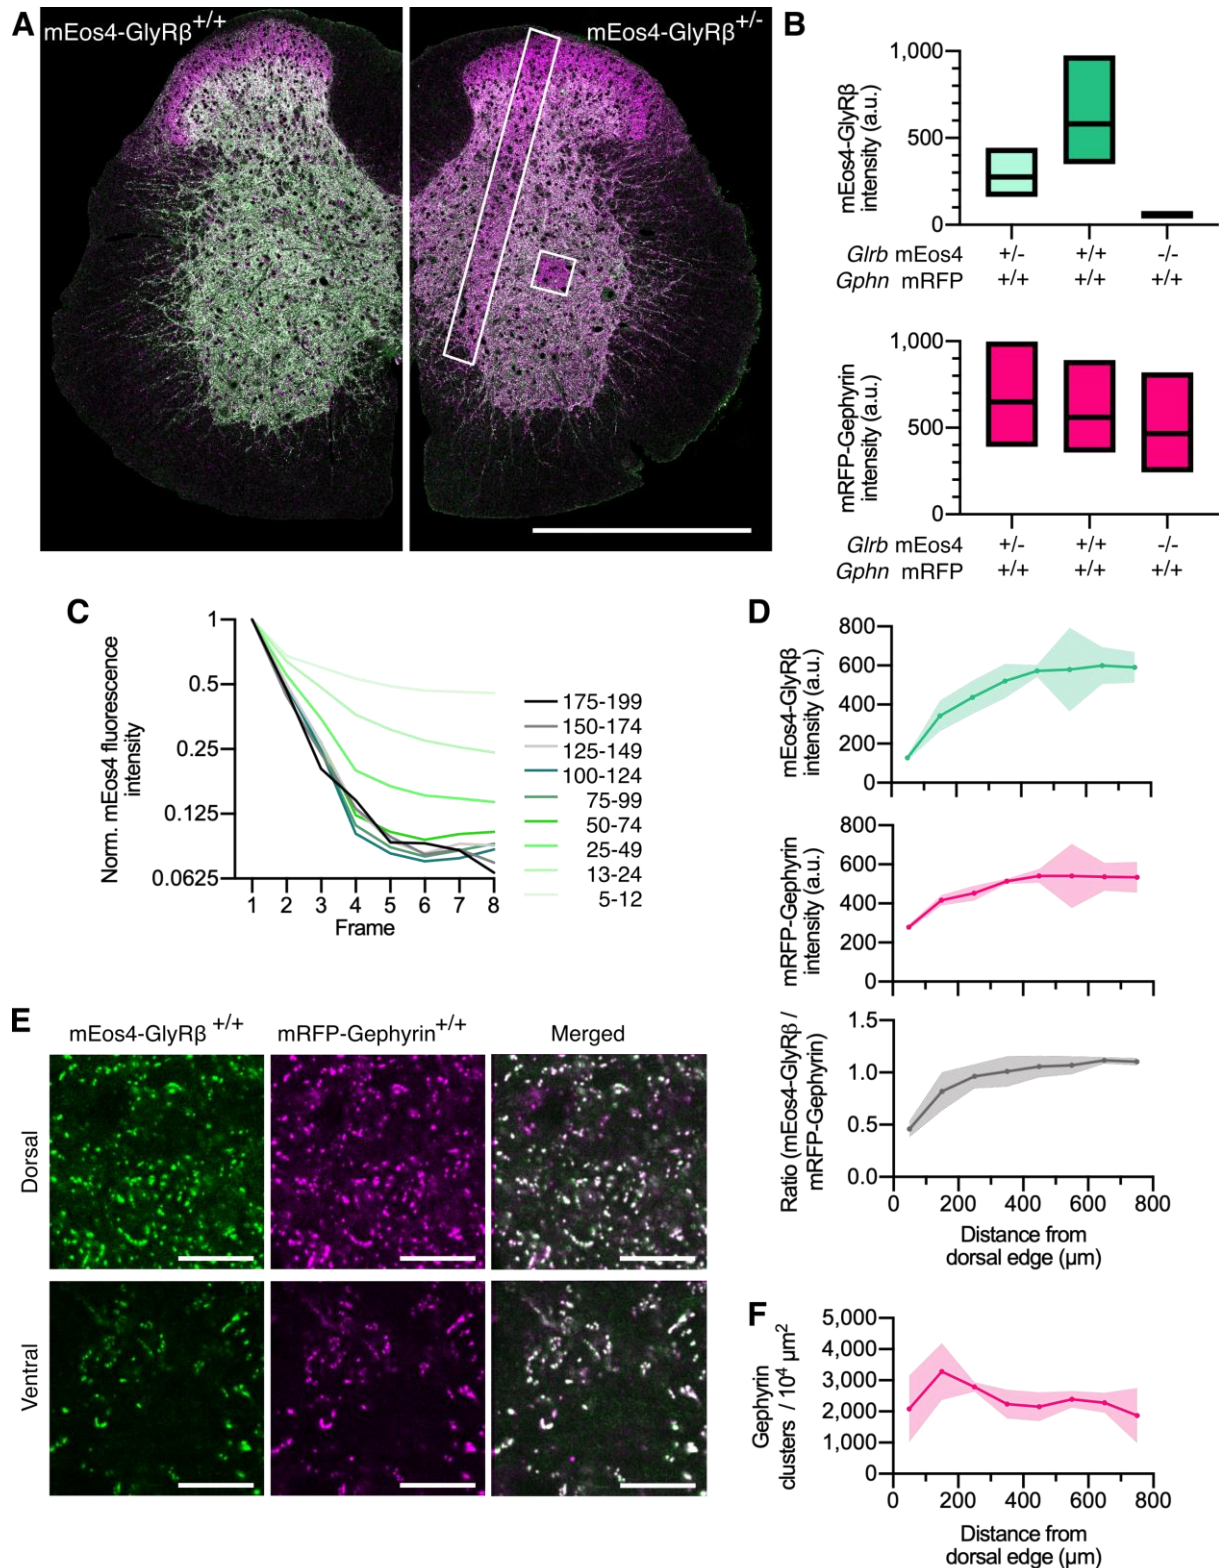

878  
879  
880 **Fig. 1. Quantitative confocal imaging of endogenous GlyRs in spinal cord tissue.** (A)  
881 Representative confocal images of 40  $\mu$ m spinal cord tissue sections from homozygous (+/+) and heterozygous (+/-) mEos4b-GlyR $\beta$  mice (green). Both mice are homozygous for mRFP-gephyrin (magenta). Scale bar = 0.5 mm. (B) Quantification of mEos4b-GlyR $\beta$  and mRFP-gephyrin fluorescent intensity of homozygous and heterozygous 2 month old animals  
882  
883  
884



885 measured in the area indicated by the white square in (A). Plots show median and quartiles. N  
886 = 5-6 images from 5-6 tissue slices per genotype from 2 mice per age group. (C) Normalized  
887 fluorescent decay traces of homozygous mEos4b measured in the area indicated by the white  
888 square in (A) over 8 consecutive frames. Intensities were binned in the first image and tracked  
889 on an individual synapse basis across the 8 frames. (D) Mean intensity  $\pm$  95% confidence  
890 interval of mEos4b-GlyR $\beta$  and mRFP-gephyrin measured from distal edge of spinal cord in 2  
891 month old homozygous mice. Intensities measured in region as indicated by white rectangle  
892 in (A). N = 3 images from 3 tissue slices from 2 mice per condition. (E) Representative  
893 images of homozygous mEos4b-GlyR $\beta$  and mRFP-gephyrin at dorsal and ventral synapses.  
894 Scale bar = 10  $\mu$ m. (F) Quantification of numbers of gephyrin clusters across the spinal cord.  
895 Plot shows mean  $\pm$  95% confidence interval. N = 3 images from 3 tissue slices from 2 mice  
896 per condition.  
897

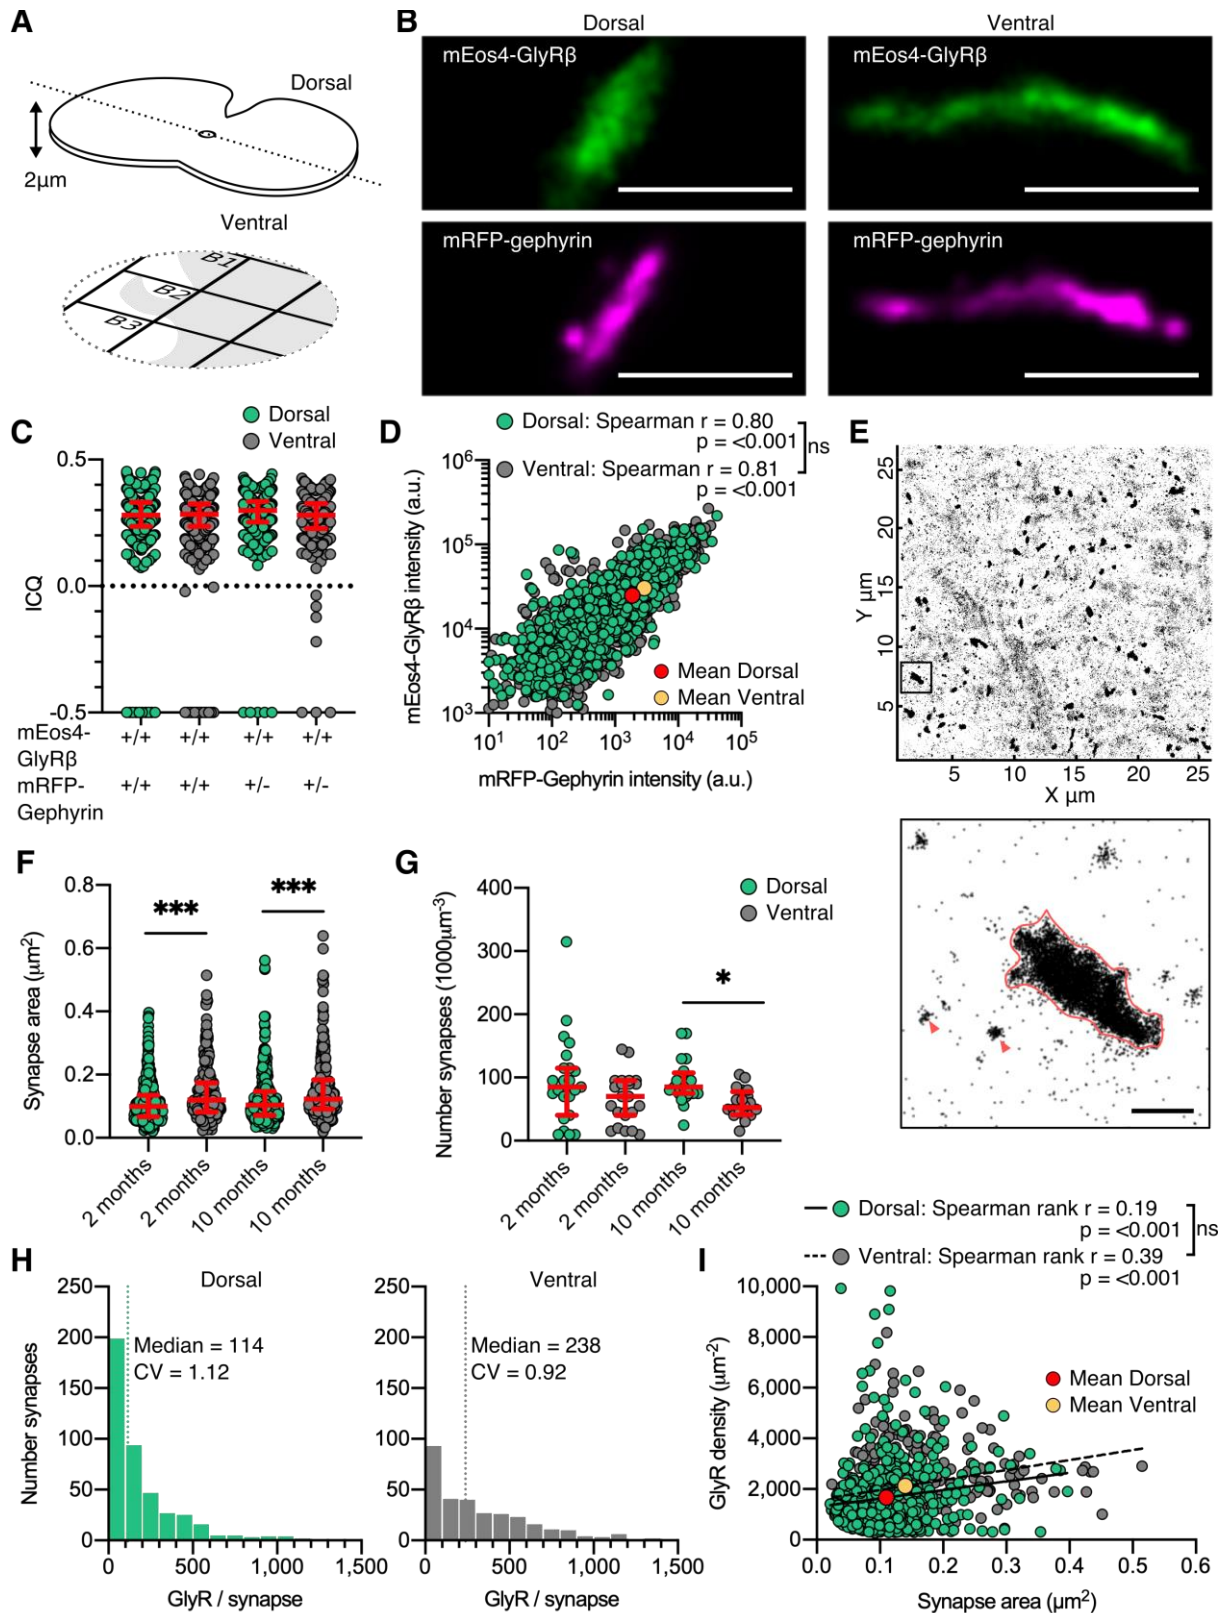

898  
899

900 **Fig. 2. Dual-color super-resolution imaging of mEos4b-GlyR $\beta$  and mRFP-gephyrin.** (A)  
901 2  $\mu\text{m}$  cryosections of spinal cord tissue were cut from dorsal and ventral tissue and placed on  
902 gridded glass coverslips. (B) Representative PALM reconstruction of mEos4b-GlyR $\beta$  and  
903 SRRF reconstruction of mRFP-gephyrin at single dorsal and ventral synapses. Scale bar =  
904 500 nm. (C) Intensity correlation quotient (ICQ) of mEos4b-GlyR $\beta$  and mRFP-gephyrin in

905 heterozygous and homozygous 2 month old mice. Plot shows median  $\pm$  interquartile range. N  
906 = 357-604 synapses from 23 dorsal and 23 ventral images from 9 and 8 tissue slices  
907 respectively from 2 mice per condition. (D) Quantification of GlyR-gephyrin occupancy in 2  
908 month old homozygous mice (*Glr<sup>b</sup>*<sup>Eos/Eos</sup> / *Gphn*<sup>mRFP/mRFP</sup>). Non-parametric Spearman's rank  
909 shows the same positive correlation at dorsal and ventral synapses. N = 1115 dorsal synapses  
910 and 1107 ventral synapses. (E) Pointillist reconstruction of mEos4b-GlyR $\beta$  detections. Insert  
911 shows a single synapse; red arrows indicate extrasynaptic receptor complexes. Scale bar =  
912 500 nm. (F) Area of dorsal vs ventral synapses in 2 and 10 month old homozygous mice. Plot  
913 shows median  $\pm$  interquartile range. N = 234-433 synapses from 20-23 images from 7-9 tissue  
914 slices from 2 mice per age per condition. Nonparametric Kruskal-Wallis ANOVA with  
915 Dunn's multiple comparison test. (G) Number of synapses in dorsal and ventral tissue in 2  
916 and 10 month old homozygous mice. Plot shows median  $\pm$  interquartile range. N = 20-23  
917 images from 7-9 tissue slices from 2 mice per age per condition. Nonparametric Kruskal-  
918 Wallis ANOVA with Dunn's multiple comparison test. (H) Histogram of the number of  
919 GlyRs per synapse calculated from the molecular conversion of detections (see Fig. S6 and  
920 S7) in 2 month old homozygous mice. N = 433 dorsal synapses and 304 ventral synapses  
921 from 23 dorsal and 23 ventral images from 9 and 8 tissue slices respectively from 2 mice. CV  
922 = coefficient of variation. (I) Scatter plot of GlyR density vs synapse area in 2 month old  
923 homozygous mice shows no difference between dorsal and ventral synapse densities. N = 433  
924 dorsal synapses and 304 ventral synapses. \*p < 0.05, \*\*p < 0.01, \*\*\*p < 0.001.  
925

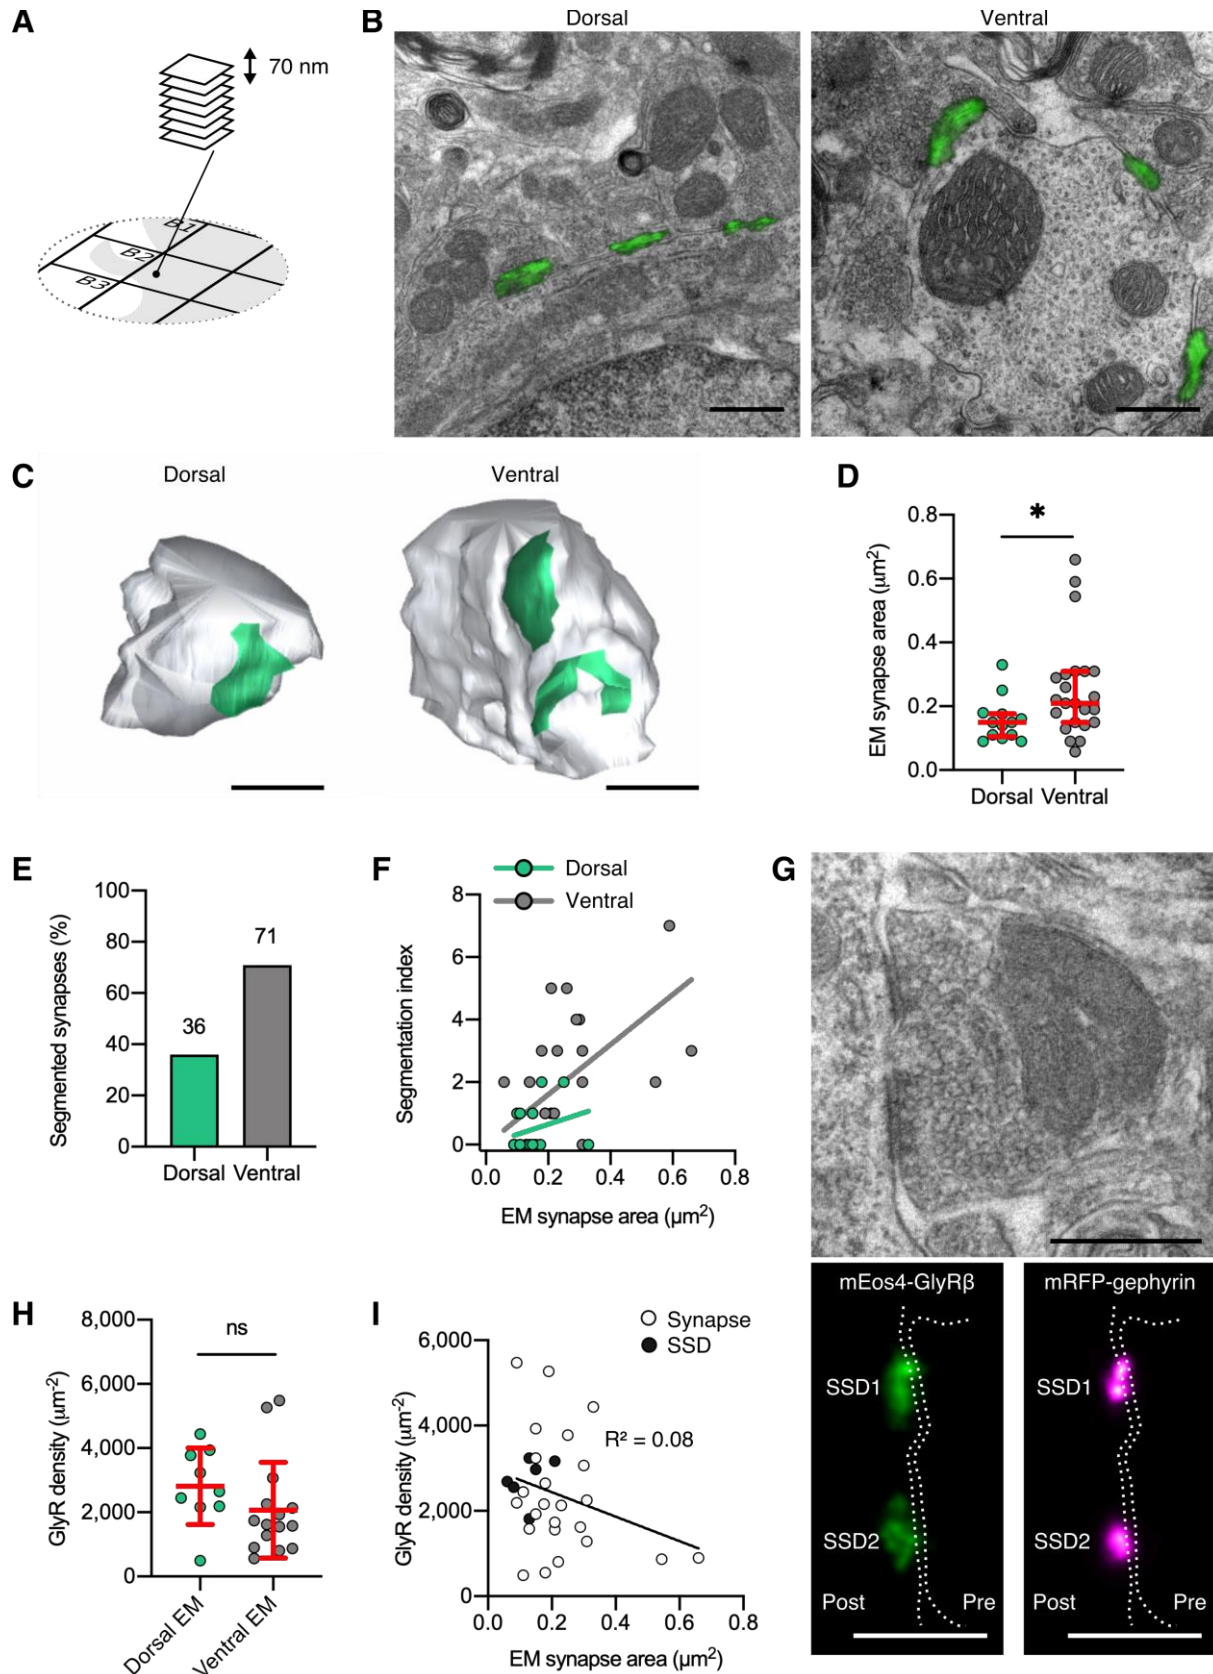

926  
927

928 **Fig. 3. Quantitative SR-CLEM of endogenous GlyR molecular organization.** (A) Samples  
929 used for PALM were re-sectioned as serial ultra-thin 70 nm sections for CLEM. (B)  
930 Representative dorsal and ventral synapses imaged with PALM (mEos4b-GlyR $\beta$ ; green) and  
931 super-imposed with their corresponding electron micrographs. Scale bar = 500 nm. (C)

932 Representative 3D reconstructions of dorsal and ventral synapses. Green = postsynaptic site,  
933 gray = presynaptic bouton. Scale bar = 500 nm. (D) Area of dorsal and ventral synapses  
934 measured by EM. Plot shows median  $\pm$  interquartile range. Nonparametric unpaired two-  
935 tailed t-test, Mann-Whitney post hoc. (E) Percentage of total synapses measured in EM with  
936 segmented shapes. (F) Comparison of segmentation index with synaptic area in dorsal and  
937 ventral synapses. (G) Juxtaposition of a raw electron micrograph and reconstructed  
938 PALM/SRRF images of sub-synaptic domains (SSDs) in the same ventral synapse. Scale bar  
939 = 500 nm. (H) Analysis of GlyR density following correction for EM area measurements. Plot  
940 shows mean  $\pm$  SD. (I) Combined scatter plot of dorsal and ventral synapse densities shows  
941 density is independent of synapse size. White = all synapses, black = SSDs. N = 13 dorsal and  
942 23 ventral synapses from 2 mice. \* $p < 0.05$ , ns = not significant.



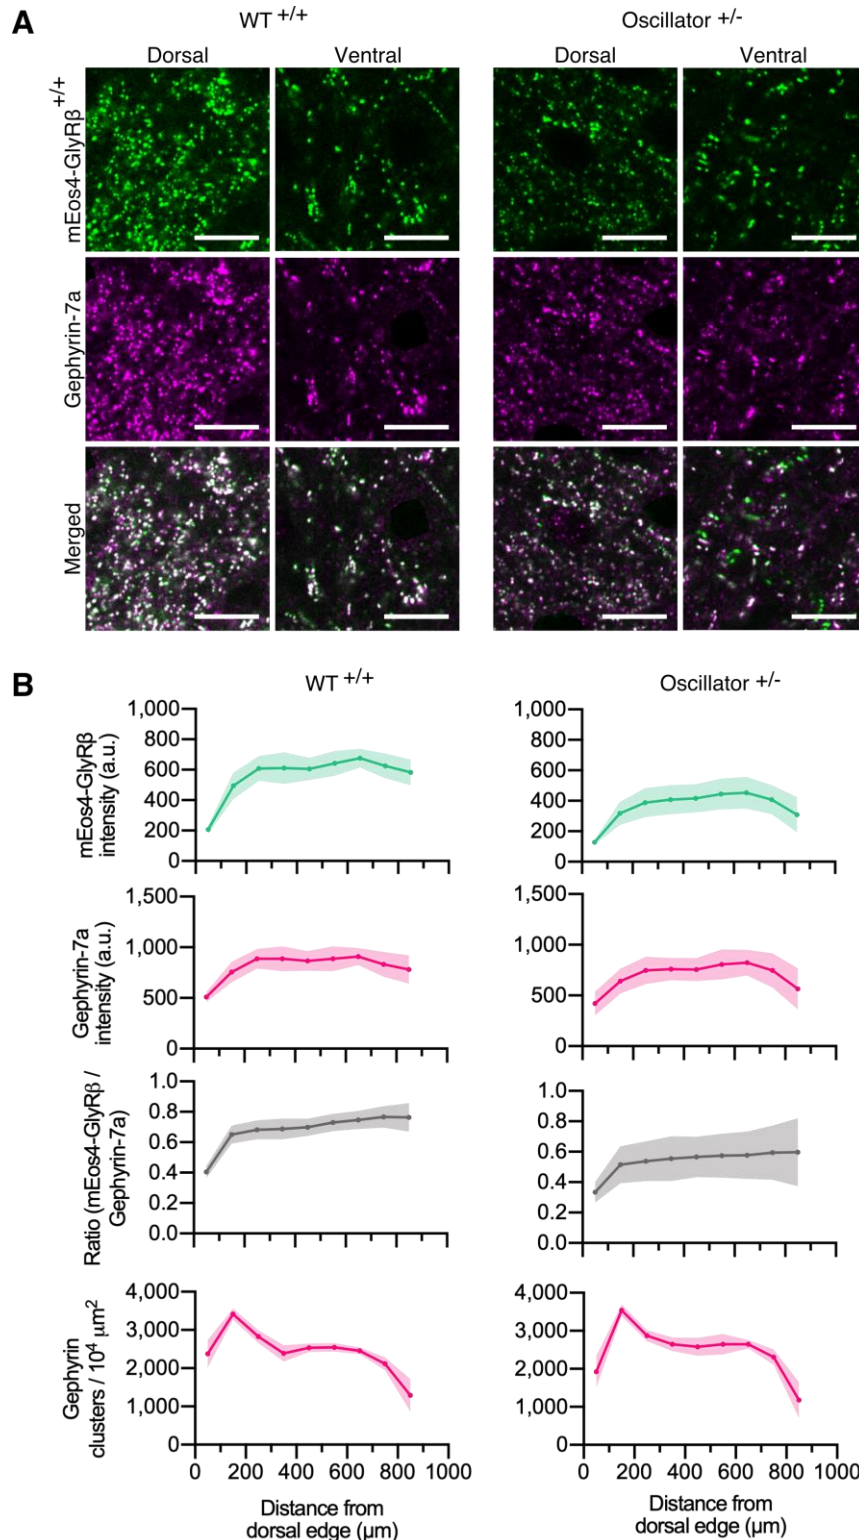

943  
944  
945  
946  
947  
948  
949  
950  
951

**Fig. 4. Quantitative confocal imaging of endogenous GlyRs in the *oscillator* mouse model.** (A) Representative confocal images of dorsal and ventral synapses from heterozygous *oscillator* mice ( $+/-$ ) compared to homozygous WT ( $+/+$ ) littermates. All mice are homozygous for mEos4b-GlyR $\beta$  (green), with gephyrin-7a immunolabeling (magenta). Scale bar = 10  $\mu\text{m}$ . (B) Mean intensity  $\pm$  95% confidence interval of mEos4b-GlyR $\beta$  and gephyrin-7a at gephyrin-positive puncta, and numbers of gephyrin clusters measured from distal edge of spinal cord in 2 month old mice. N = 9-11 images from 9-11 tissue slices from 2 mice per genotype.



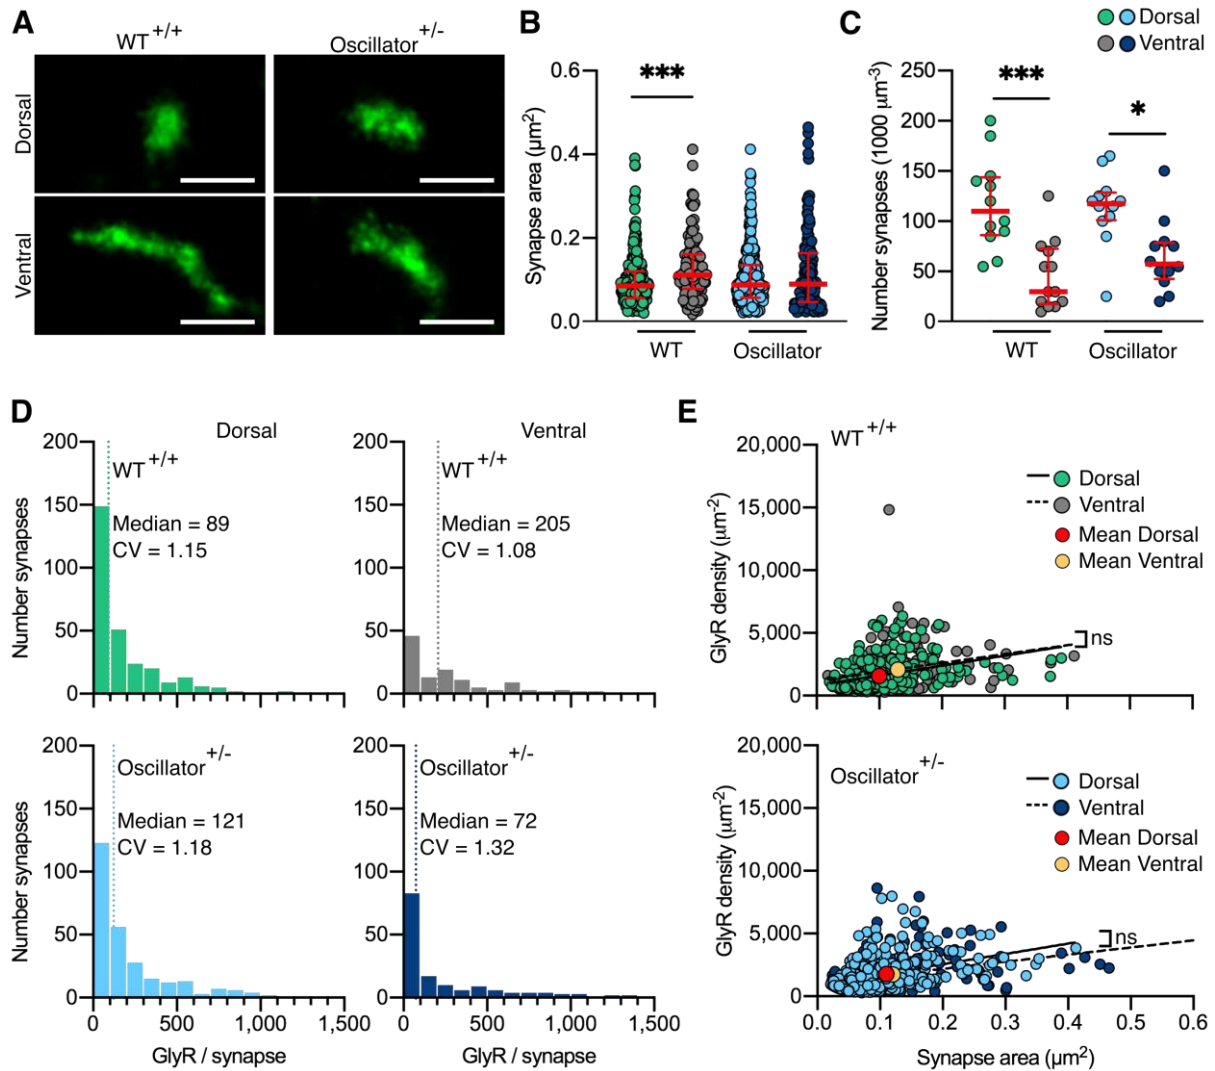

952  
953  
954  
955  
956  
957  
958  
959  
960  
961  
962  
963  
964  
965  
966  
967  
968  
969  
970  
971

**Fig. 5. PALM imaging of the GlyR in the oscillator mouse model.** (A) Representative PALM reconstructions of mEos4b-GlyR $\beta$  at single dorsal and ventral synapses in heterozygous (+/-) oscillator and homozygous (+/+) WT littermates. All mice are homozygous for mEos4b-GlyR $\beta$ . Scale bar = 500 nm. (B) Area of dorsal vs ventral synapses in heterozygous oscillator vs WT littermates. Plot shows median  $\pm$  interquartile range. N = 120-282 synapses from 24 images from 9-11 tissue slices from 2 mice per genotype. Nonparametric Kruskal Wallis ANOVA with Dunn's multiple comparison test. (C) Number of synapses in dorsal and ventral tissue in heterozygous oscillator vs WT mice. Plot shows median  $\pm$  interquartile range. N = 12-13 images from 2 mice per genotype. Parametric one-way ANOVA with Tukey's multiple comparison test. (D) Histogram of the number of GlyRs per synapse calculated from the molecular conversion of detections (see Fig. S7, S11 and S12). N = 282 WT dorsal and 120 ventral synapses, 273 oscillator dorsal and 156 ventral synapses from 24 images from 9-11 tissue slices from 2 mice per genotype. CV = coefficient of variation. (E) Scatter plots of GlyR density vs synapse area show no difference between dorsal and ventral synapse densities in WT and oscillator. N = same as in (D). \*p < 0.05, \*\*\*p < 0.001, ns = not significant.
