# Supplementary material for: Identification of a stereotypic molecular arrangement of endogenous glycine receptors at spinal cord synapses
Source: bioRxiv or medRxiv preprint supplement (doi:10.1101/2021.09.09.459599), 2021-09-13
Supplement: Supplementary file [file media-1.pdf]

# **Identification of a stereotypic molecular arrangement of endogenous glycine receptors at spinal cord synapses**

**Stephanie A Maynard<sup>1</sup>, Philippe Rostaing<sup>1</sup>, Natascha Schaefer<sup>2</sup>, Olivier Gemin<sup>1</sup>,  
Adrien Candat<sup>1</sup>, Andréa Dumoulin<sup>1</sup>, Carmen Villmann<sup>2</sup>, Antoine Triller<sup>1\*</sup>,  
Christian G Specht<sup>1,3\*</sup>**

<sup>1</sup>Institut de Biologie de l'ENS (IBENS), Ecole Normale Supérieure, CNRS, Inserm, Université PSL, Paris, France

<sup>2</sup>Institute for Clinical Neurobiology, University Hospital, Julius-Maximilians-University, Würzburg, Germany

<sup>3</sup>Diseases and Hormones of the Nervous System (DHNS), Inserm, Université Paris-Saclay, Le Kremlin-Bicêtre, Paris, France

\* correspondence: [christian.specht@inserm.fr](mailto:christian.specht@inserm.fr), [triller@biologie.ens.fr](mailto:triller@biologie.ens.fr)

## **Supplementary Information**

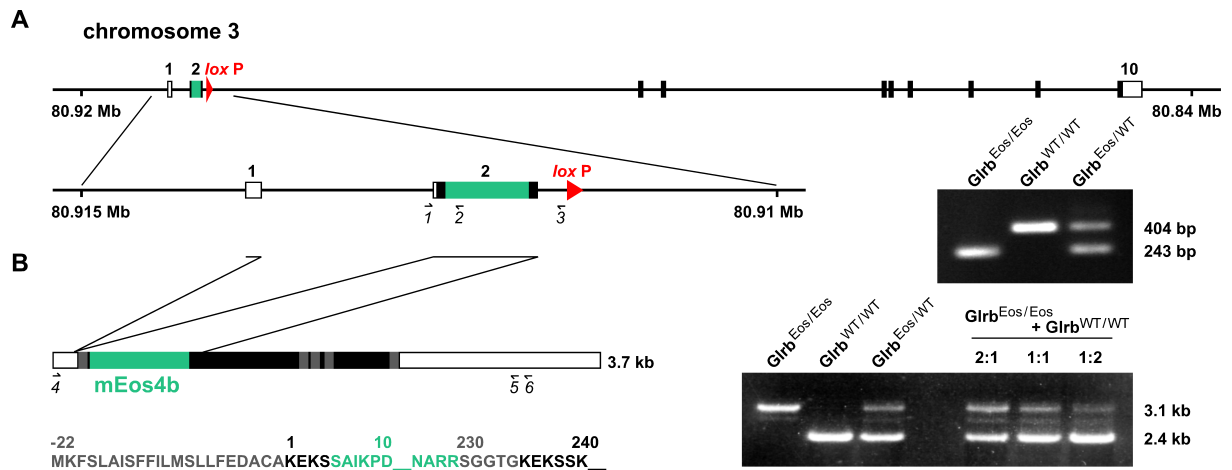

**Fig. S1. Generation of the mEos4b-GlyR $\beta$  knock-in mouse model.**

(A) The coding sequence of mEos4b (green) was inserted in exon 2 of the *Glr $\beta$*  gene by homologous recombination, as shown by the amplification of a 243 bp PCR product in genomic DNA from *Glr $\beta$ <sup>Eos/Eos</sup>* and *Glr $\beta$ <sup>Eos/WT</sup>* animals using the primers 1, 2 and 3. (B) Splicing and transcript expression. The mEos4b sequence is inserted after the signal peptide (shown in gray) before the extracellular domain of the GlyR $\beta$  subunit. Right panel: Semi-quantitative RT-PCR. Mixing of spinal cord mRNA from *Glr $\beta$ <sup>Eos/Eos</sup>* and *Glr $\beta$ <sup>WT/WT</sup>* animals at a 1:1 ratio and amplification with primers 4 and 5 produces a PCR pattern that matches the amplification of the two alleles from the heterozygous *Glr $\beta$ <sup>Eos/WT</sup>* mRNA.

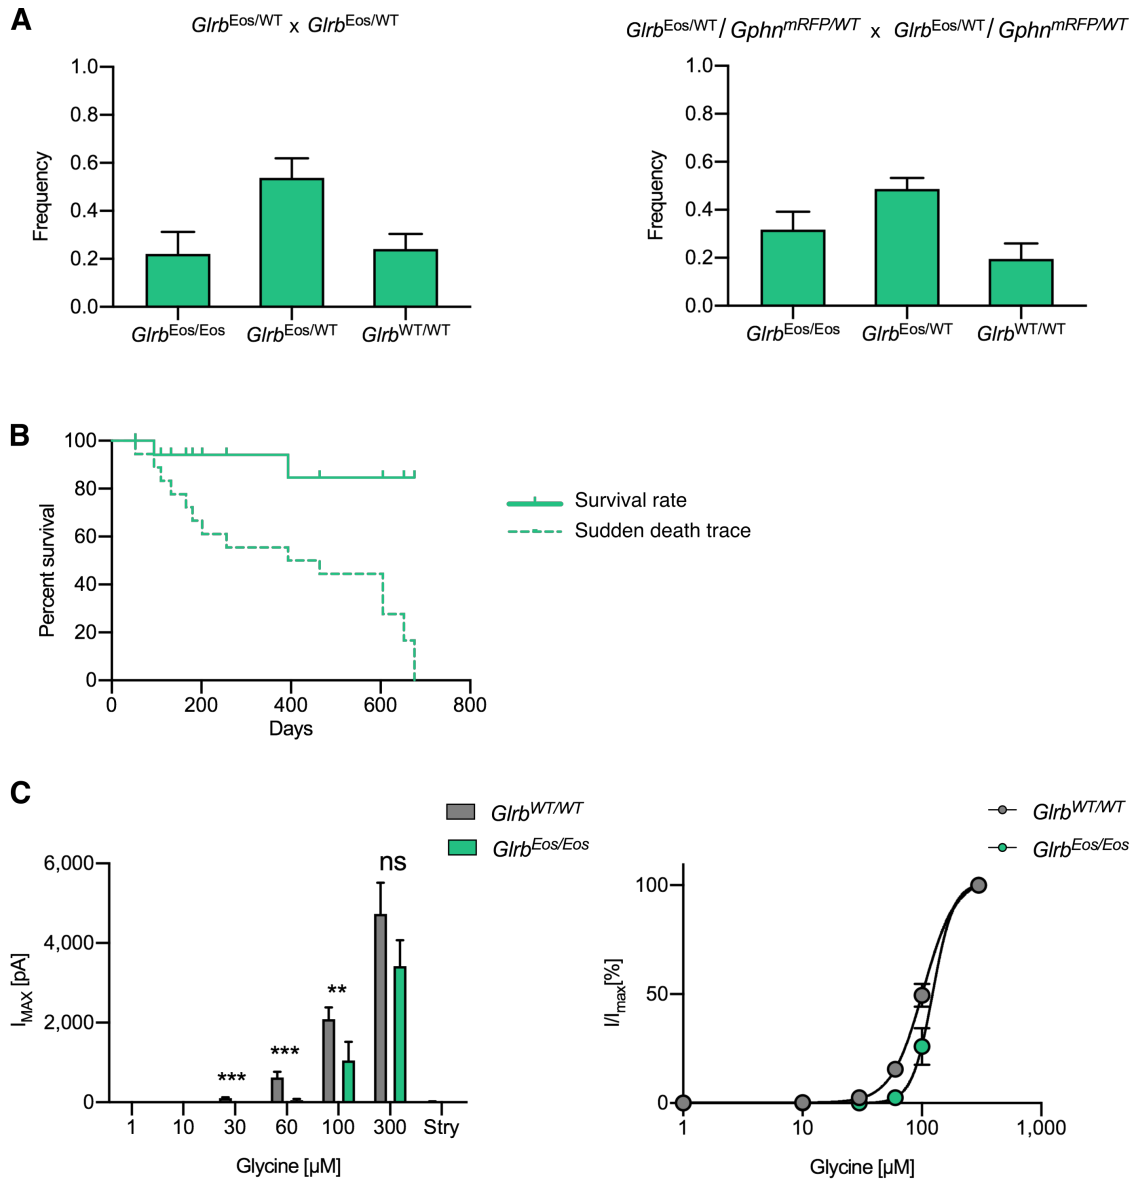

**Fig. S2. Physiological and functional characterization of mEos4b-GlyR $\beta$  knock-in mice.**

(A) Mendelian inheritance of  $Glr^{Eos/Eos}$ ,  $Glr^{Eos/WT}$  and  $Glr^{WT/WT}$  genotypes in the offspring of heterozygous single KI matings  $Glr^{Eos/WT} \times Glrb^{Eos/WT}$  (left panel), and heterozygous double KI matings  $Glr^{Eos/WT}/Gphn^{mRFP/WT} \times Glrb^{Eos/WT}/Gphn^{mRFP/WT}$  (right panel). Left panel: N = 42 pups from 5 litters, plot shows mean  $\pm$  SEM; right panel: N = 45 pups from 7 litters. (B) Survival plot of homozygous knock-in mEos4b-GlyR $\beta$  mice ( $Glr^{Eos/Eos}$ ). N = 19 mice. (C) Left panel: Comparison of mean maximal currents ( $I_{max}$ ) at different concentrations of glycine (1-300  $\mu$ M) for  $Glr^{WT/WT}$  (N = 10) and  $Glr^{Eos/Eos}$  (N = 11 neurons). Glycinergic currents were blocked with 10  $\mu$ M strychnine (Stry) at the end of each recording. Right panel: Normalized dose response curves for  $Glr^{WT/WT}$  and  $Glr^{Eos/Eos}$  show a subtle shift in the  $EC_{50}$  of mEos4b-GlyR $\beta$  containing receptors compared to the wild type. Plots show mean  $\pm$  SEM. \*\*p < 0.01, \*\*\*p < 0.001.

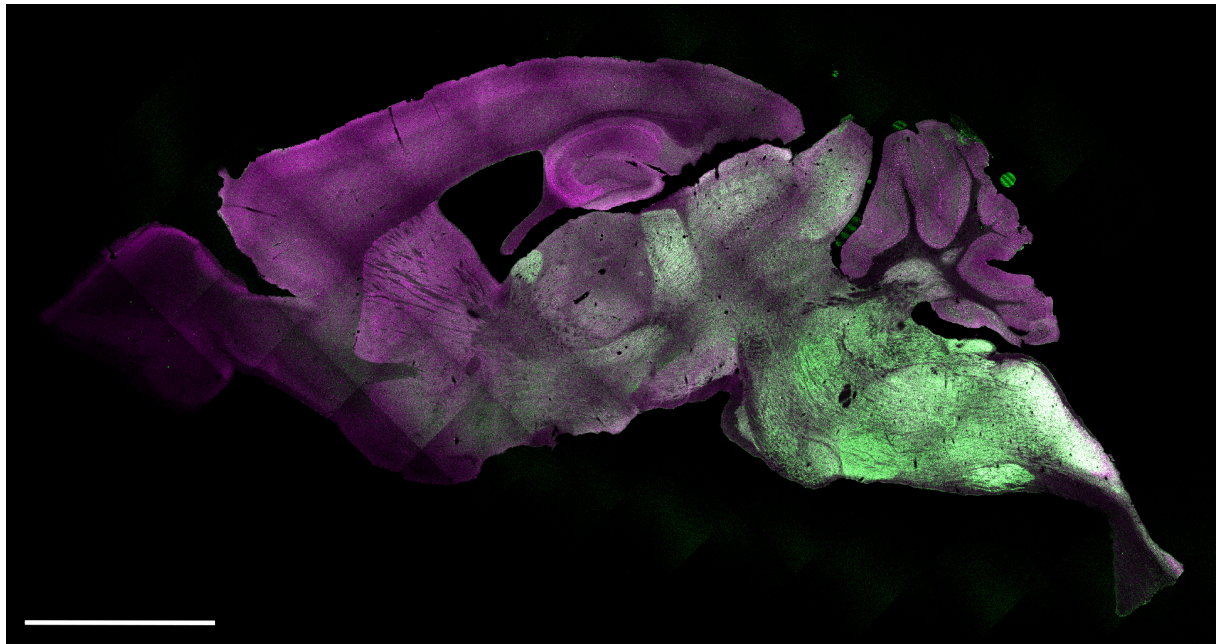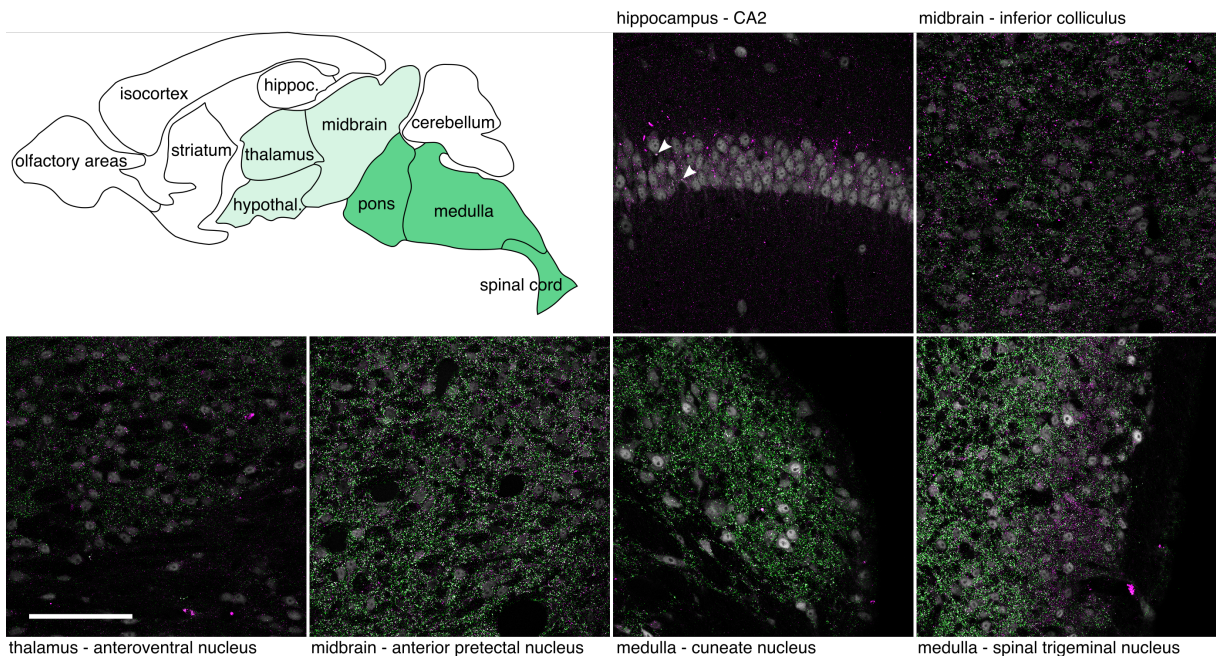

**Fig. S3. Protein expression of mEos4b-GlyR $\beta$  in brain sections of knock-in mice.**

Expression of mEos4b-GlyR $\beta$  (green) and mRFP-gephyrin (magenta) across brain regions (confocal image of a sagittal vibratome section of a double knock-in *Glrb*<sup>Eos/Eos</sup> / *Gphn*<sup>mRFP/mRFP</sup> mouse at 2 months of age). Scale bar = 2.5 mm. The brain atlas depicts the various brain regions with reference to the overall mEos4b-GlyR $\beta$  expression levels (white = none-low expression, light green = medium expression, darker green = high expression). High magnification images: Confocal images of various brain regions from the same vibratome section, showing the expression of mEos4b-GlyR $\beta$  (green) and mRFP-gephyrin (magenta), as well as NeuN immunolabeling (grey). Arrowheads depict synaptic puncta in the pyramidal cell body layer of the hippocampus that are positive for mEos4b-GlyR $\beta$ . Scale bar = 100  $\mu$ m.

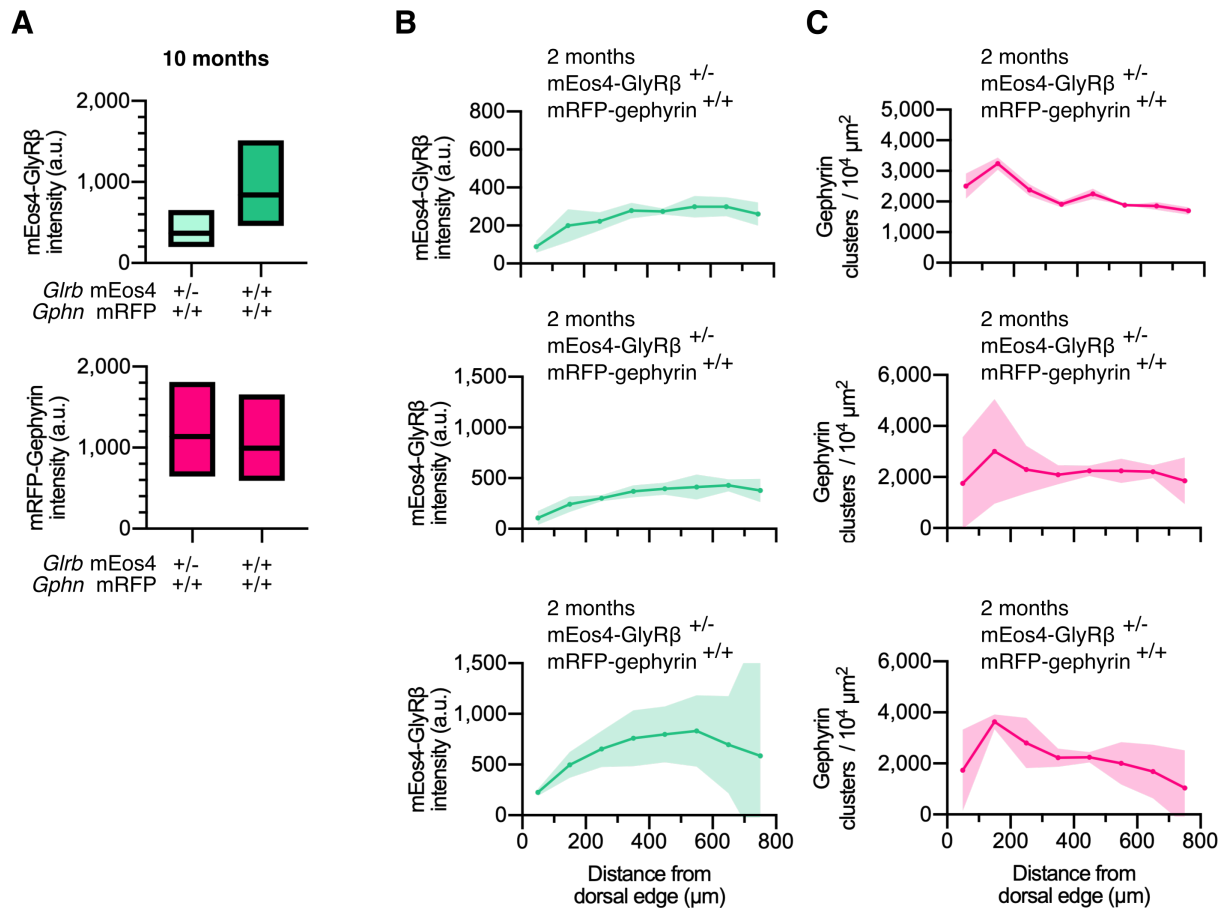

**Fig. S4. Quantitative confocal imaging in 10 month old animals.**

(A) Intensity of mEos4b-GlyRβ and mRFP-gephyrin at spinal cord synapses in homozygous and heterozygous mEos4b-GlyRβ mice, measured in the area indicated by the white square in Fig. 1A. Plots show median and quartiles. N = 5 images per condition from 5 tissue slices per genotype from 2 mice per age group. (B) Quantification of mEos4b-GlyRβ intensity at gephyrin-positive puncta across the spinal cord in 2 month old heterozygous (+/-; *Glr*<sup>Eos/WT</sup>) and 10 old month homozygous (+/+; *Glr*<sup>Eos/Eos</sup>) and heterozygous animals. Intensities measured in regions as indicated by rectangle in (Fig.1.A). Plots show mean ± 95% confidence interval. N = 2-4 images from 2-4 tissue slices from 2 mice per genotype. (C) Quantification of numbers of gephyrin clusters across the spinal cord in 2 month old heterozygous and 10 month old homozygous and heterozygous animals. Plots show mean ± 95% confidence interval. N = 2-4 images from 2-4 tissue slices from 2 mice per genotype.

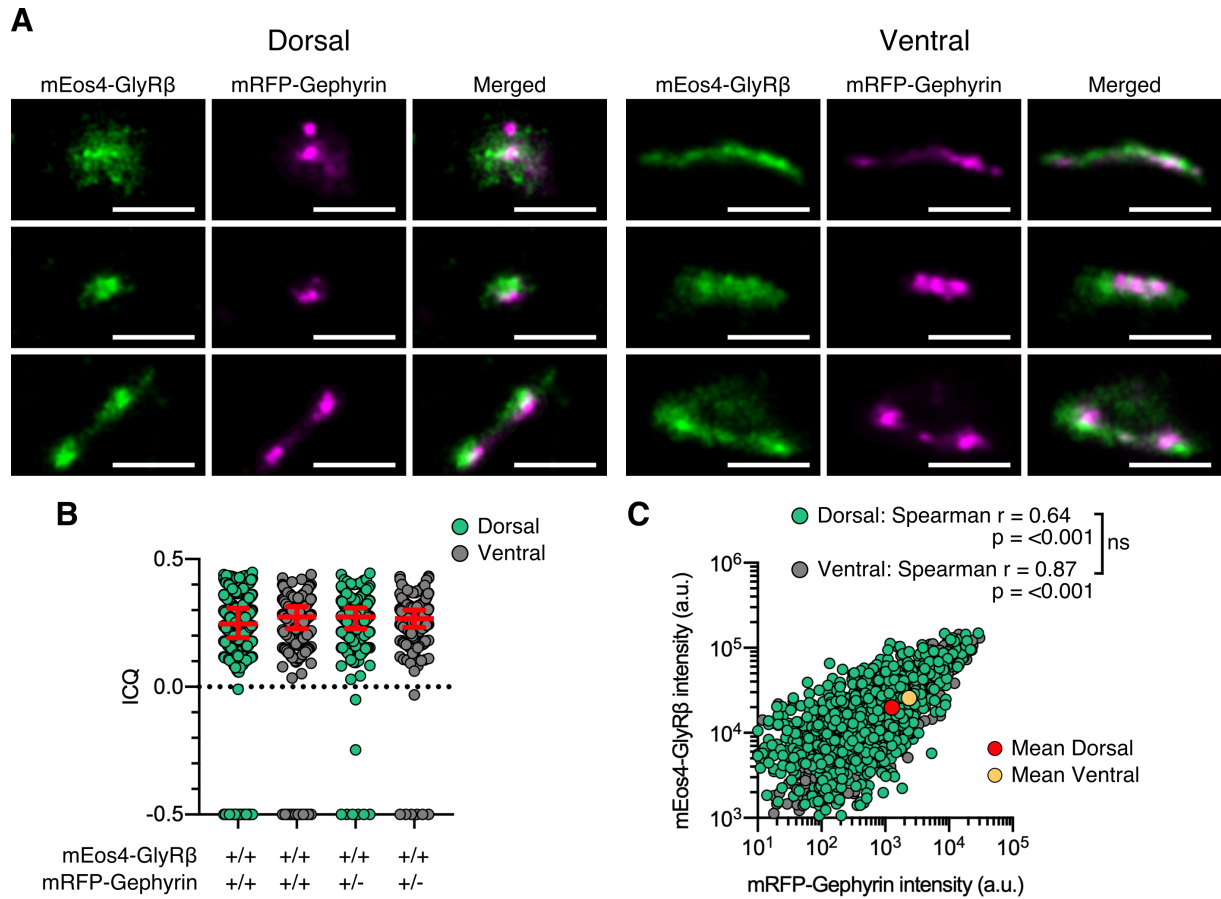

**Fig. S5. Dual-color super-resolution synapse shape & 10 month correlation analysis.**

(A) Examples of synapse shapes and sizes in dorsal and ventral tissue. Scale bar = 500 nm. (B) Intensity correlation quotient (ICQ) of mEos4b-GlyR $\beta$  and mRFP-gephyrin in 10 month old heterozygous and homozygous mice. Plot shows median  $\pm$  interquartile range.  $N = 466$ - $611$  synapses from 17 dorsal and 19 ventral images from 7 tissue slices per spinal cord region from 2 mice per condition. (C) Quantification of GlyR-gephyrin occupancy in 10 month old homozygous mice ( $Glr^{\text{Eos/Eos}} / Gphn^{\text{mRFP/mRFP}}$ ). Non-parametric Spearman's rank shows the same positive correlation at dorsal and ventral synapses.  $N = 1241$  dorsal synapses and 813 ventral synapses. ns = not significant.

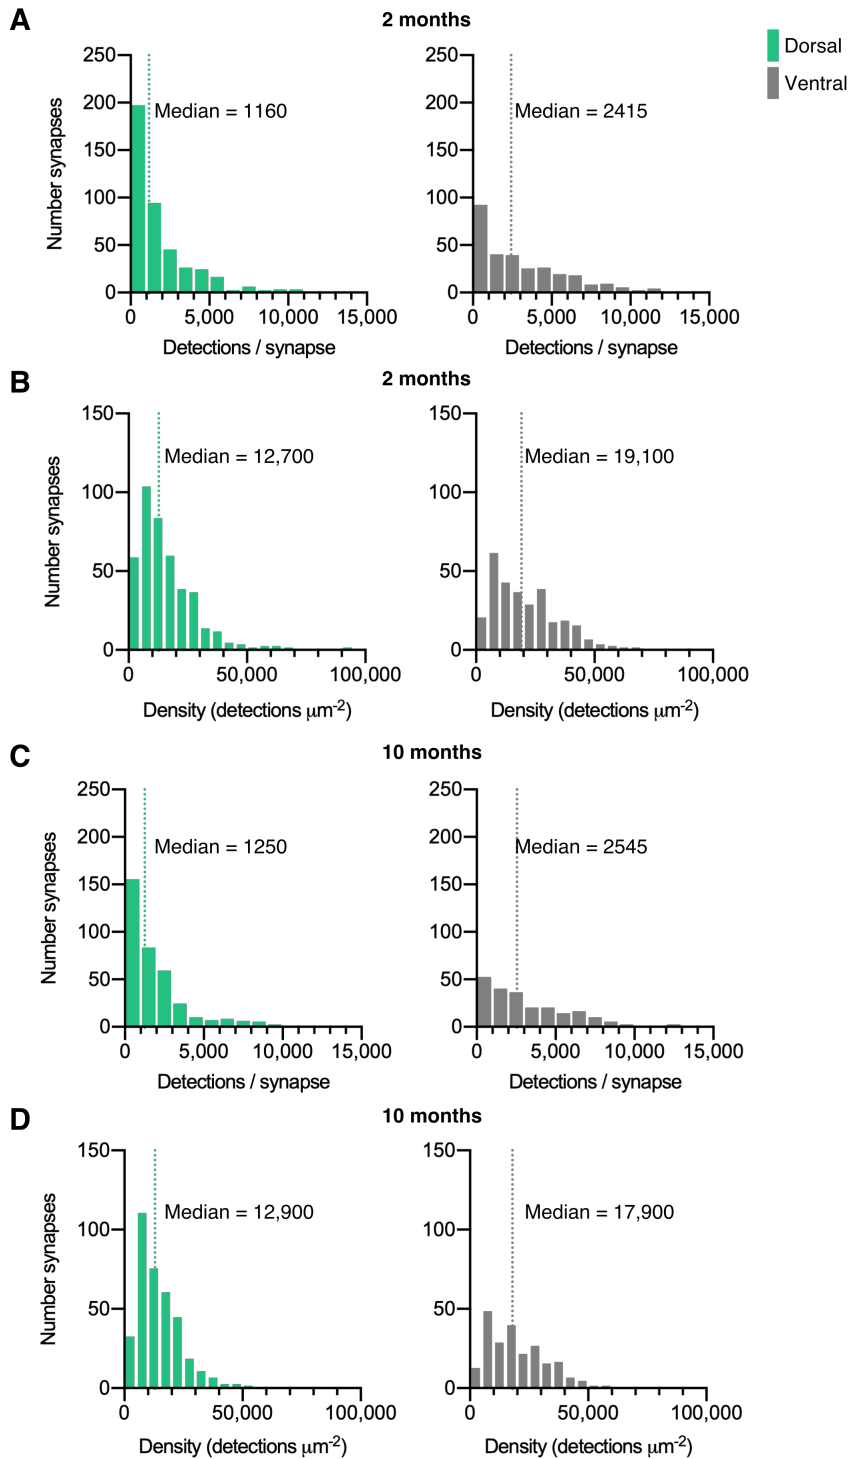

**Fig. S6. Quantification of mEos4b detections at synapses.**

Histograms of mEos4b-GlyR $\beta$  detections per synapse (A & C) and density of detections (B & D). N = 433 dorsal synapses and 304 ventral synapses in 2 month old mice. N = 372 dorsal synapses and 234 ventral synapses in 10 month old mice.

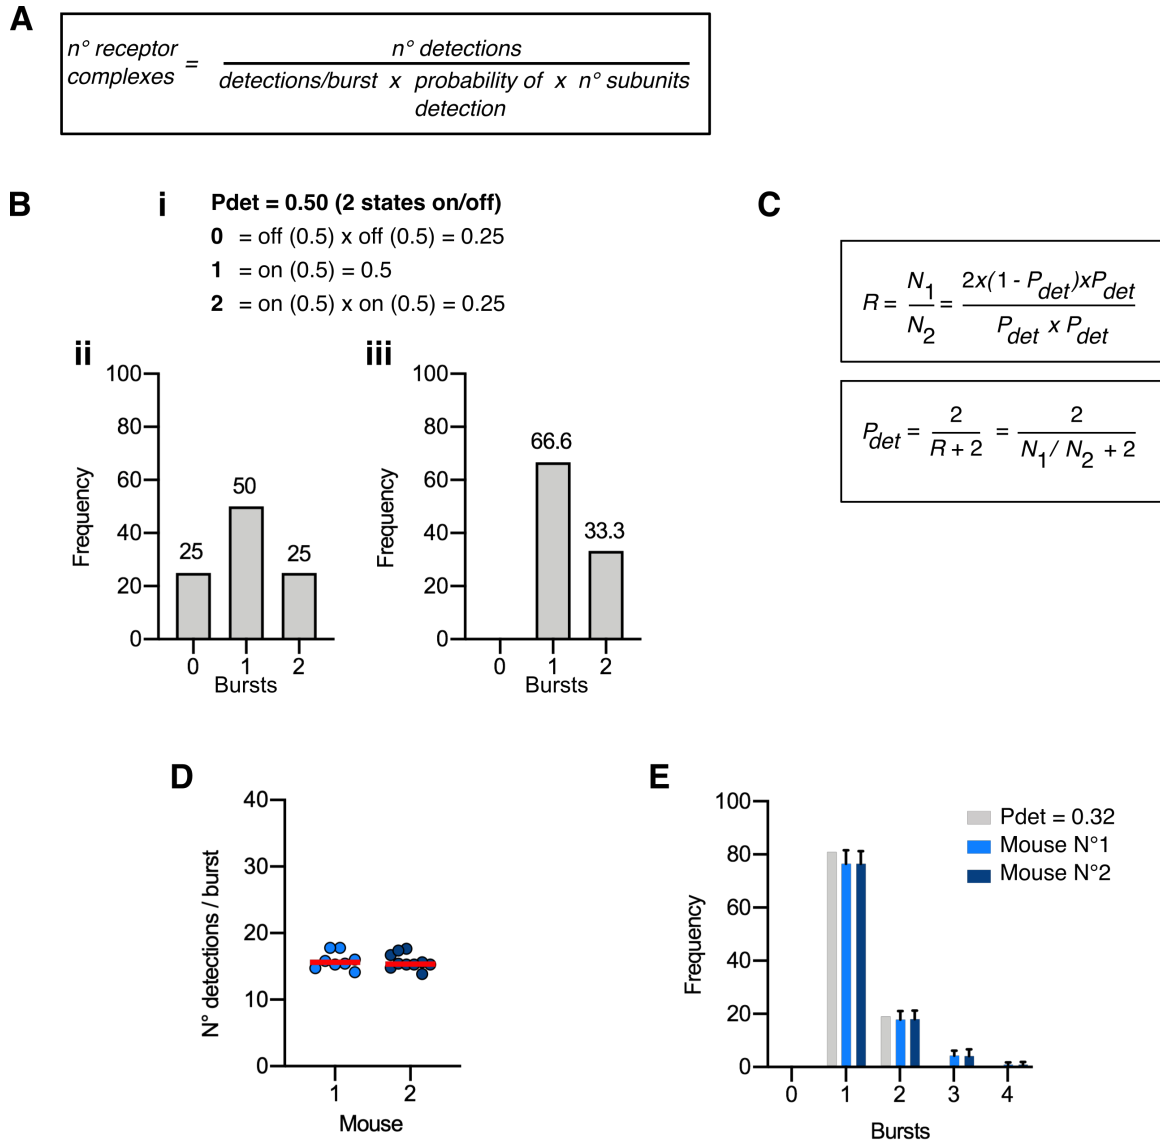

**Fig. S7. Molecule conversion of mEos4b-GlyR $\beta$  detections into GlyRs copy numbers.**

(A) Descriptive formula for converting fluorophore detections into molecule numbers based on SMLM recordings in sparsely populated, extrasynaptic membrane compartments (Patrizio et al., 2017). Three parameters are required: the number of repetitive detections of the single fluorophores (average detections per burst), the probability that the fluorophore is functional (the probability of detection  $P_{det}$ ), and the stoichiometry of the heteropentameric GlyR complex based on a  $\alpha 3:\beta 2$  receptor stoichiometry (Durisic et al., 2014, Patrizio et al., 2017). (B) Theoretical binomial distribution of the number of bursts of fluorescently labeled GlyR $\beta$  subunits (imaging 0, 1 or 2 subunits) and a  $P_{det} = 0.5$  (i, ii), adjusted for the experimental situation in which only the counts of 1 and 2 bursts per cluster are visible (iii). (C) Derivation of the formula for calculating  $P_{det}$ , using the counts of 1 and 2 bursts of detections. (D) Number of mEos4b detections per burst in homozygous  $Glr^{\text{Eos/Eos}}$  animals from our experimental data.  $N = 8-9$  images per mouse from 2 mice. (E) Distribution of the number of bursts of mEos4b detections in homozygous  $Glr^{\text{Eos/Eos}}$  mice.  $N = 8-9$  images per mouse from 2 mice. The light gray bars represent the adjusted distribution for  $P_{det} = 0.32$  that was calculated from the experimental data (blue bars) according to the formula given in (C).



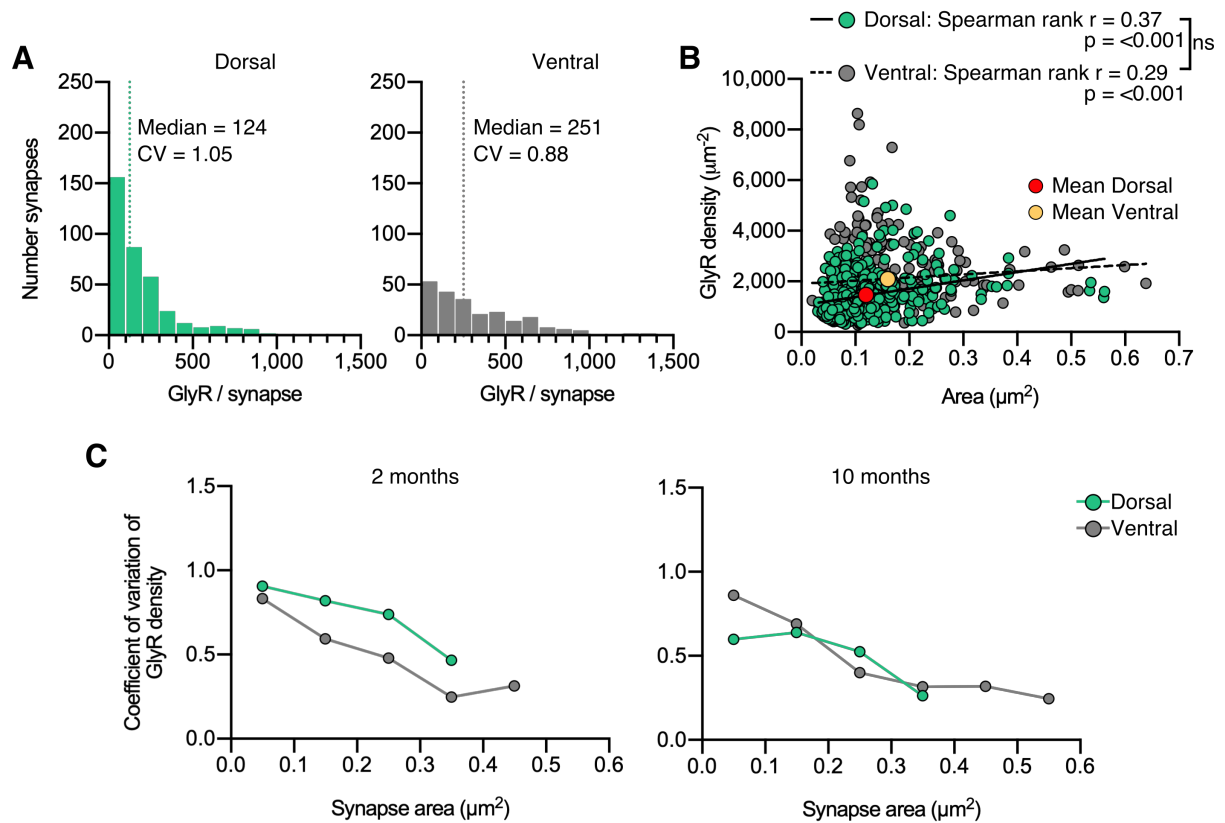

**Fig. S8. Copy numbers and GlyRs densities at synapses (10 months).**

(A) Histogram of the number of GlyRs per synapse calculated from the molecular conversion of detections in 10 month old mice (see Fig. S6 and S7).  $N = 372$  dorsal and 234 ventral synapses from 20 images from 7 tissue slices per region from 2 mice. CV = coefficient of variation. (B) Scatter plot of GlyR density vs synapse area shows no difference between dorsal and ventral synapse densities. ns = not significant. (C) Analysis of the coefficient of variation of GlyR density with respect to synapse area for dorsal and ventral synapses in 2 and 10 month old mice.

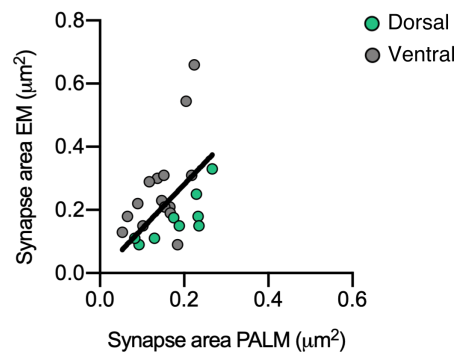

**Fig. S9. Comparison of PALM and EM area measurements.**

Comparison of synapse areas measured by PALM and EM shows a close correspondence.

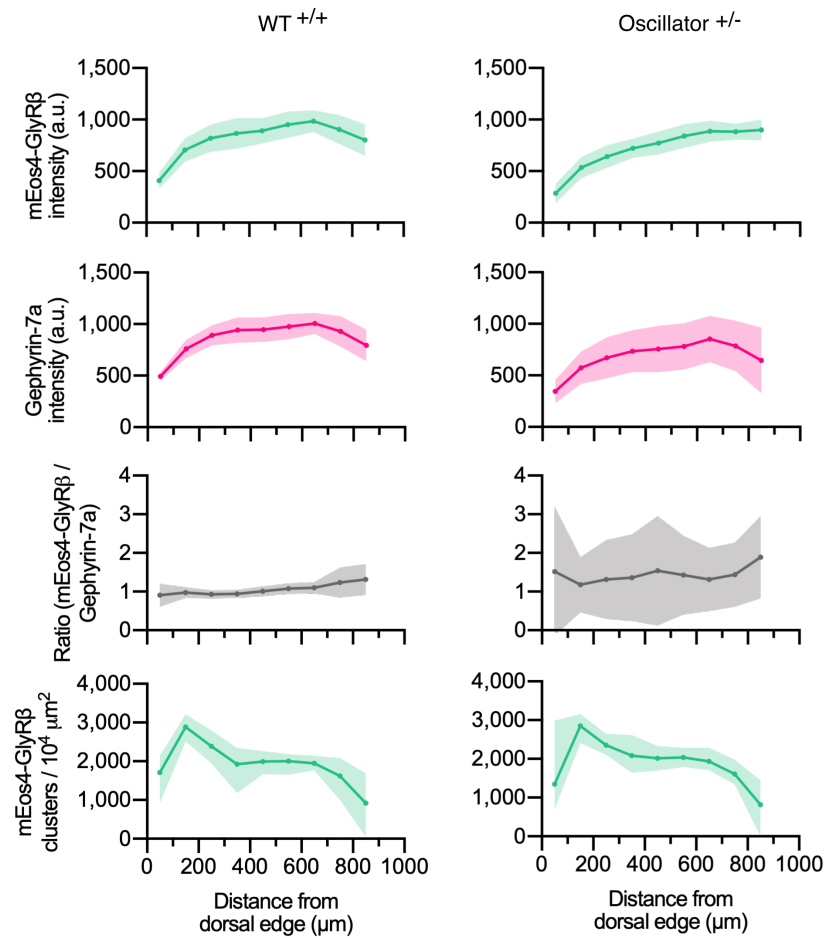

**Fig. S10. Quantitative confocal analysis at mEos4 puncta of the *oscillator* mouse model.** Intensity of mEos4b-GlyR $\beta$  and mRFP-gephyrin at mEos4-positive puncta across the spinal cord in mice heterozygous (+/-) for oscillator compared to homozygous WT (+/+) littermates. All mice are homozygous for mEos4b-GlyR $\beta$ . Intensities measured in regions as indicated by rectangle in (Fig.1.A). Plots show mean  $\pm$  95% confidence interval. N = 9-11 images from 9-11 tissue slices from 2 mice per genotype (same data as in Fig. 4, but using a mask generated in the mEos4b channel instead of the Cy3 immunolabeled gephrin).

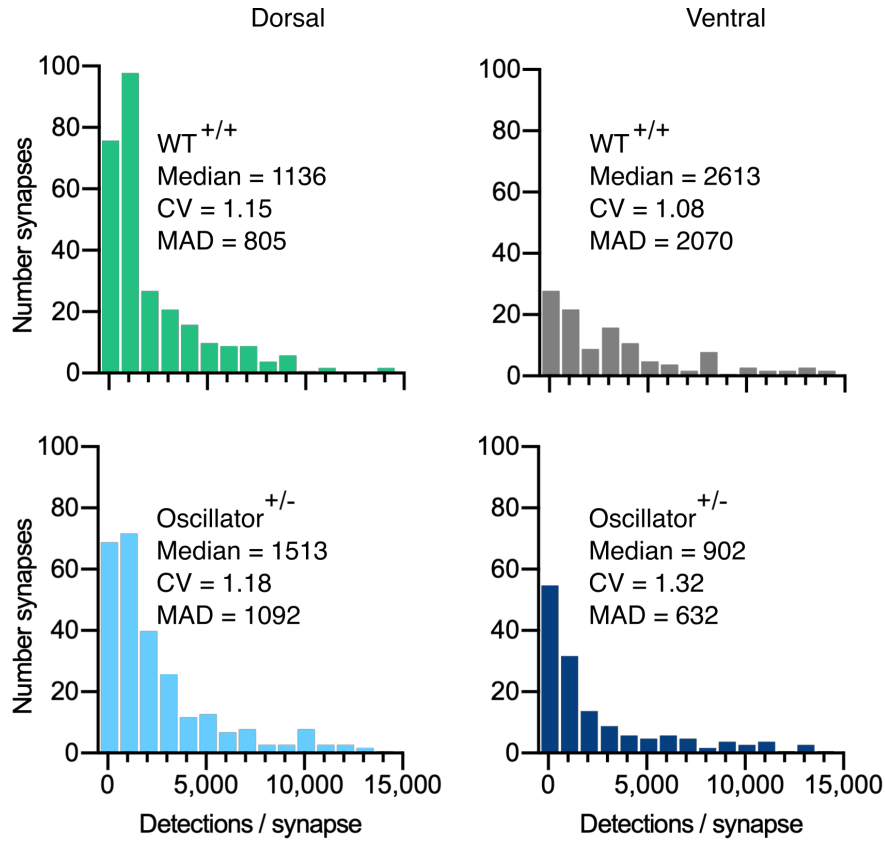

**Fig. S11. Quantification of mEos4b detections at synapses in the *oscillator* mouse model.** Histograms of mEos4b-GlyR $\beta$  detections per synapse in heterozygous (+/-) *oscillator* and homozygous (+/+) WT littermates. N = 282 WT dorsal and 120 ventral synapses, 273 *oscillator* dorsal and 156 ventral synapses from 2-4 tissue slices and 2 mice for all conditions. CV = coefficient of variation, MAD = median absolute deviation.

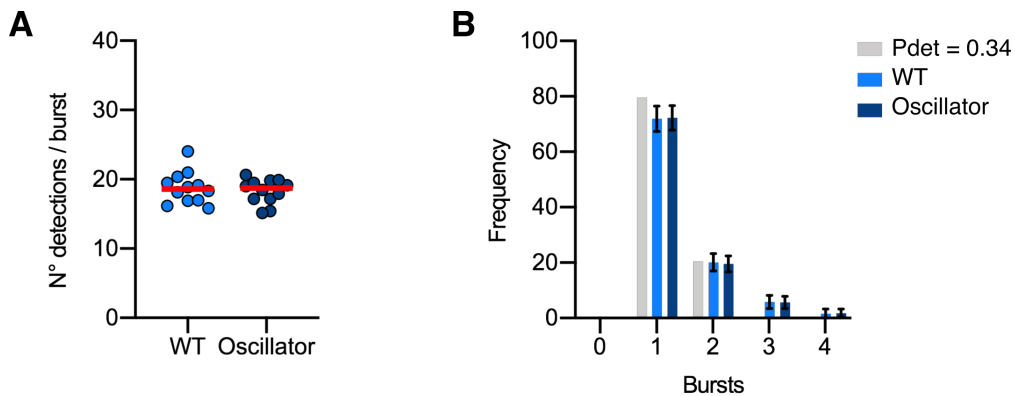

**Fig. S12. Molecule conversion of mEos4b-GlyR $\beta$  detections into GlyRs copy numbers in the *oscillator* mouse model.**

(A) Number of mEos4b detections per burst in homozygous *Glrb*<sup>Eos/Eos</sup> mice in heterozygous *oscillator* and homozygous WT littermates. N = 12 images per mouse. (B) Frequency distribution of bursts of mEos4b detections in homozygous *Glrb*<sup>Eos/Eos</sup> mice. The light gray bars indicate a binomial distribution for  $P_{det} = 0.34$  that was calculated from the experimental data as described in Fig. S7. N = 12 images per mouse.
